# Supplementary material for: New Guaiane-Type Sesquiterpenoids Biscogniauxiaols A–G with Anti-Fungal and Anti-Inflammatory Activities from the Endophytic Fungus Biscogniauxia Petrensis
Source: MDPI journal article supplement (doi:10.3390/jof9040393), 2023-03-23
Supplement: s1 [file s1]

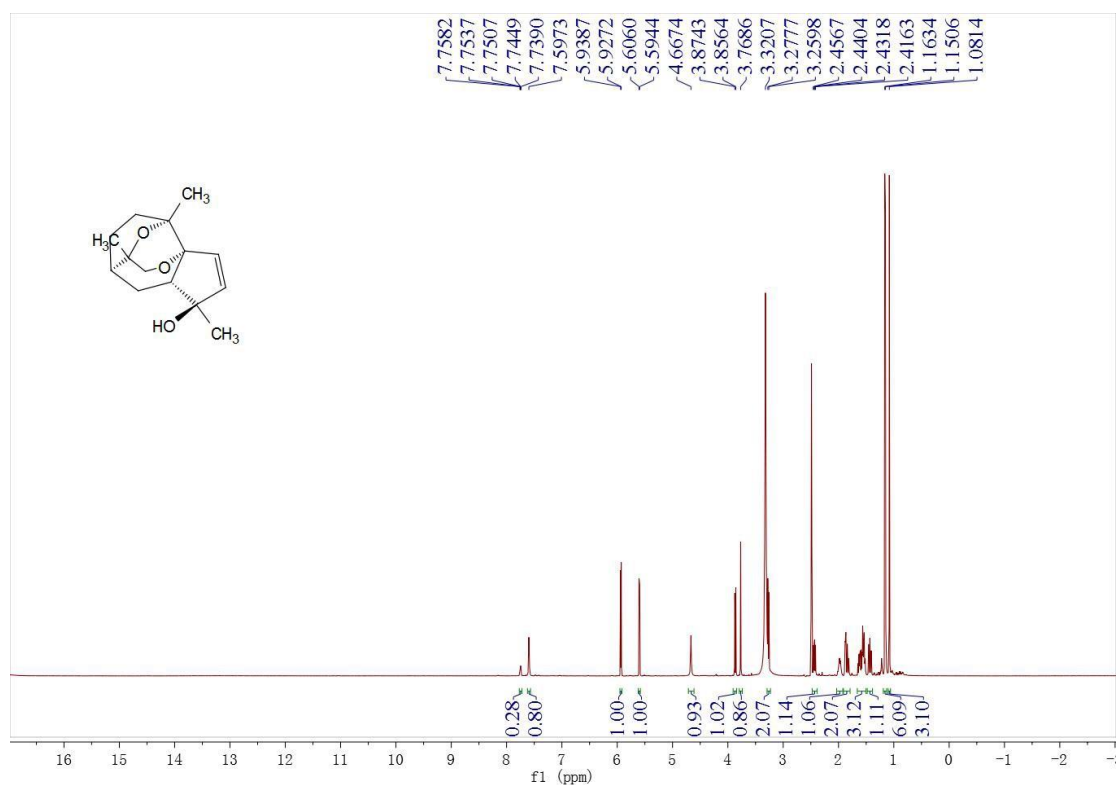

Figure S1. <sup>1</sup>H NMR spectrum of compound 1 in DMSO-*d*<sub>6</sub>.

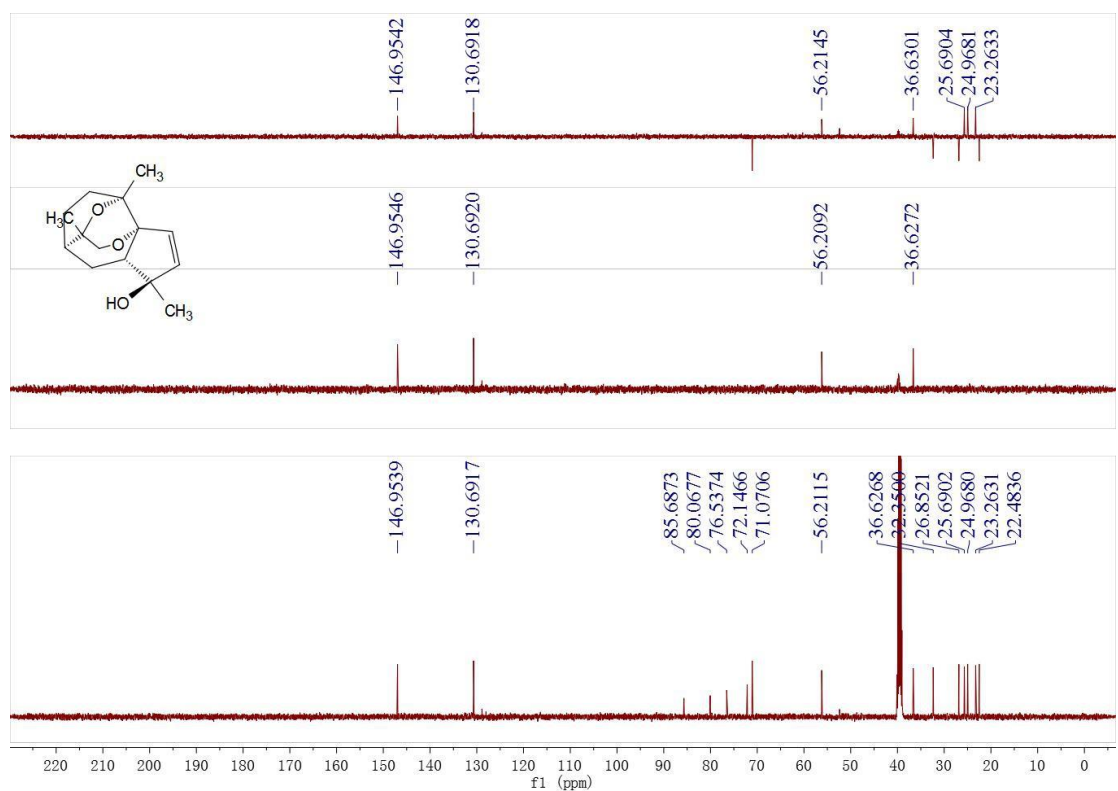

Figure S2. <sup>13</sup>C NMR and DEPT spectrum of compound 1 in DMSO-*d*<sub>6</sub>.

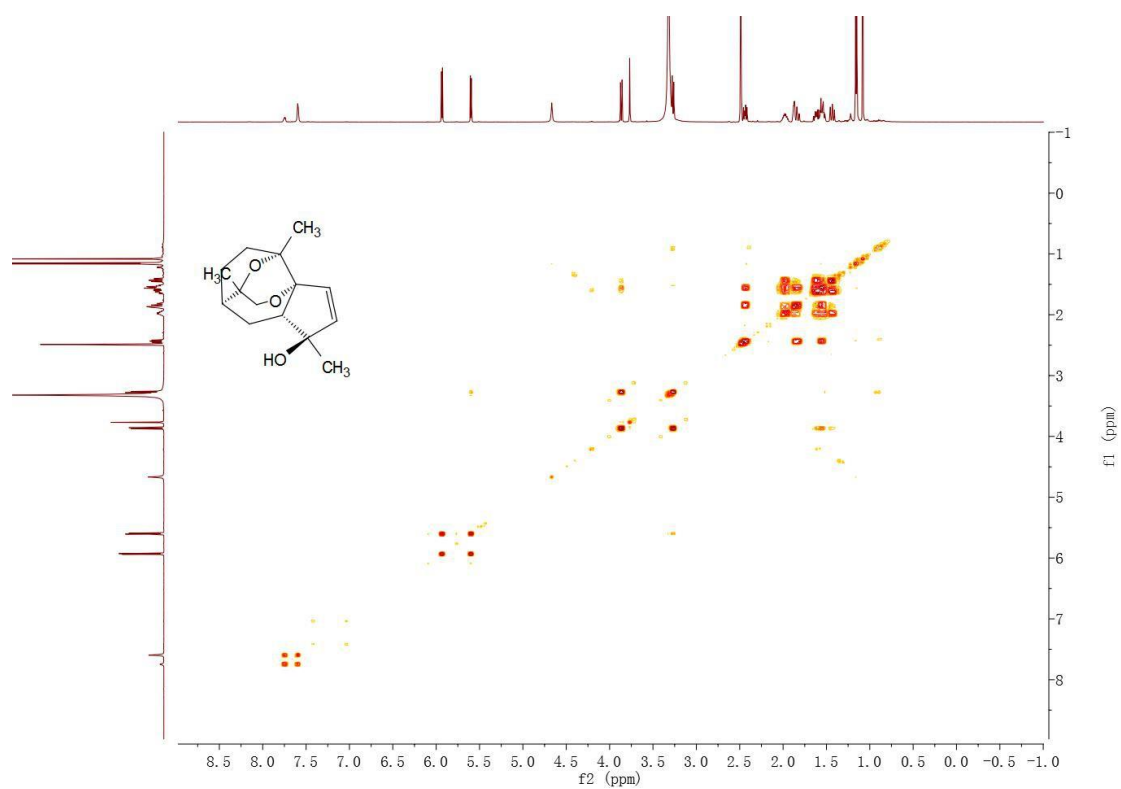

**Figure S3.**  $^1\text{H}$ - $^1\text{H}$  COSY spectrum of compound **1** in  $\text{DMSO-}d_6$ .

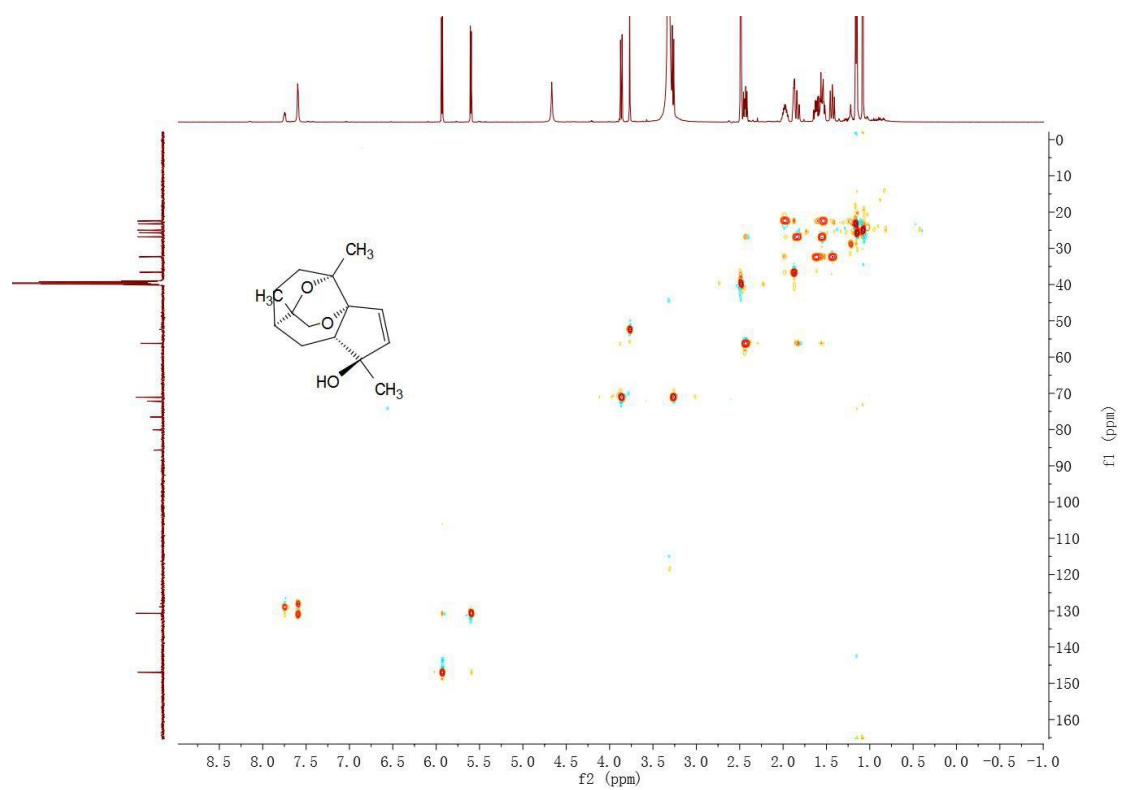

**Figure S4.** HSQC spectrum of compound **1** in  $\text{DMSO-}d_6$ .

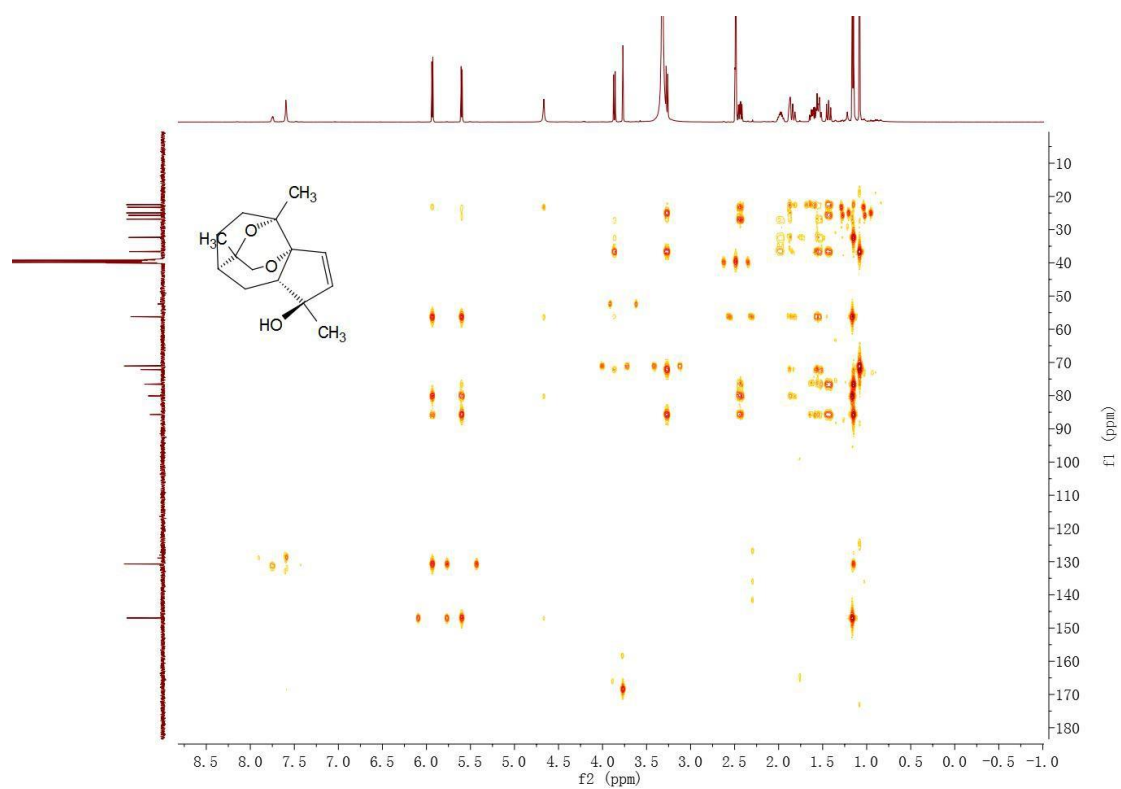

**Figure S5.** HMBC spectrum of compound **1** in DMSO-*d*<sub>6</sub>.

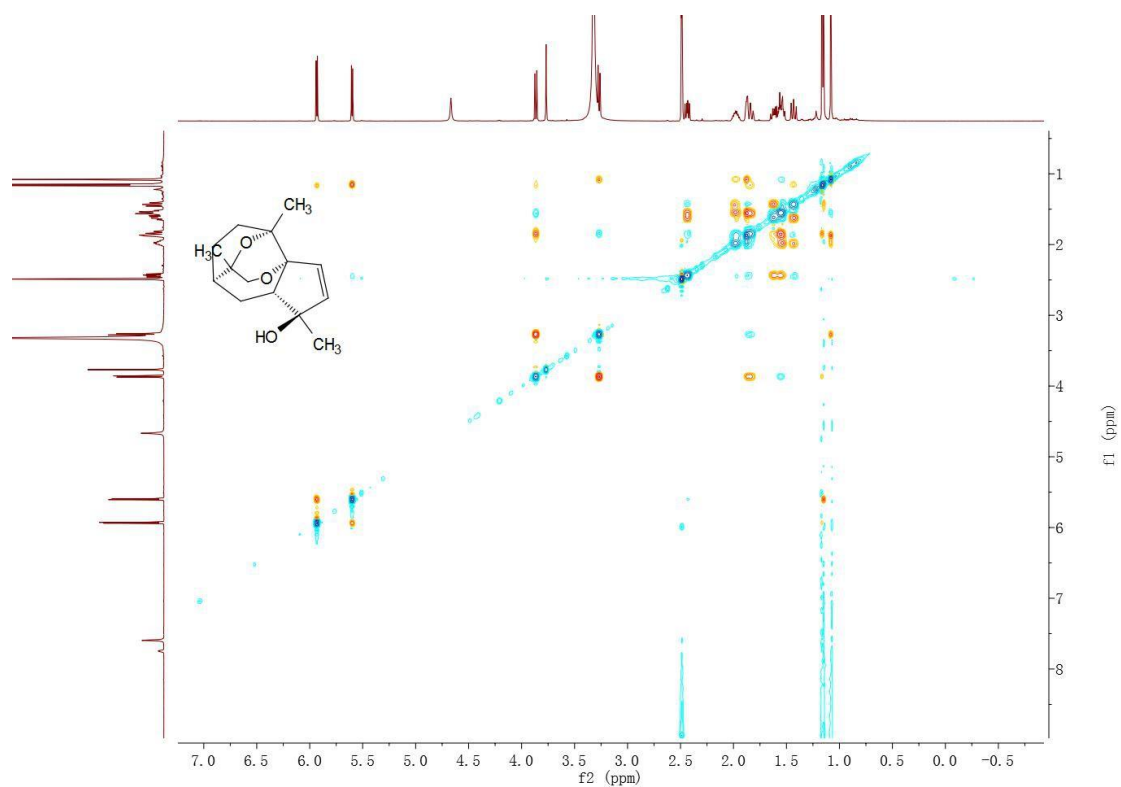

**Figure S6.** ROESY spectrum of compound **1** in DMSO-*d*<sub>6</sub>.

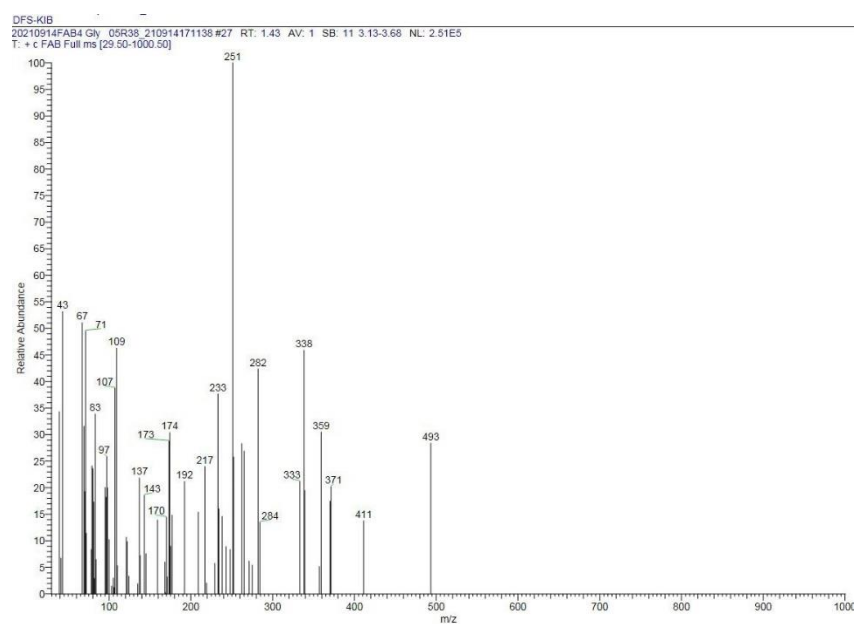

**Figure S7.** HRFABMS spectrum of compound **1**.

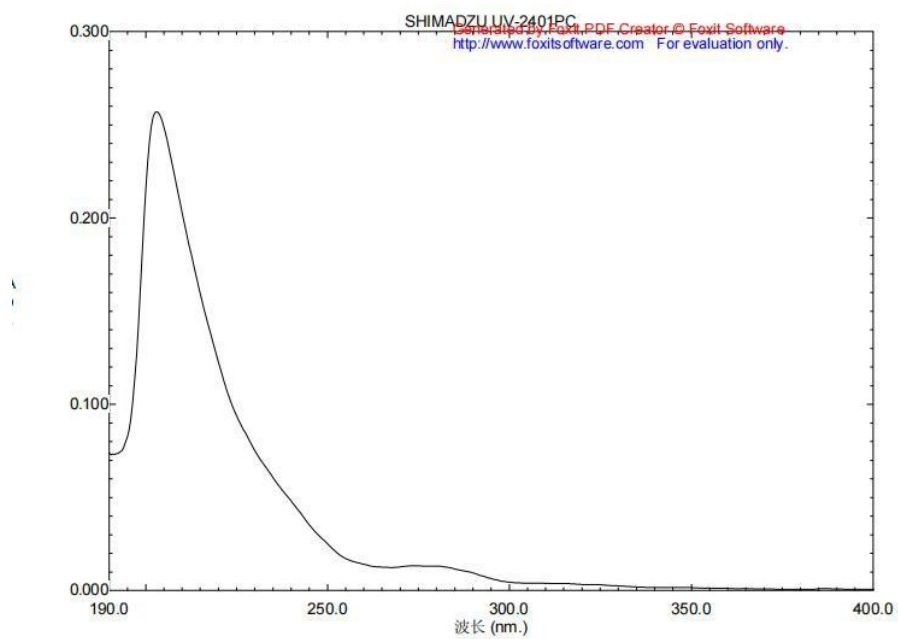

**Figure S8.** UV spectrum of **1** in methanol.

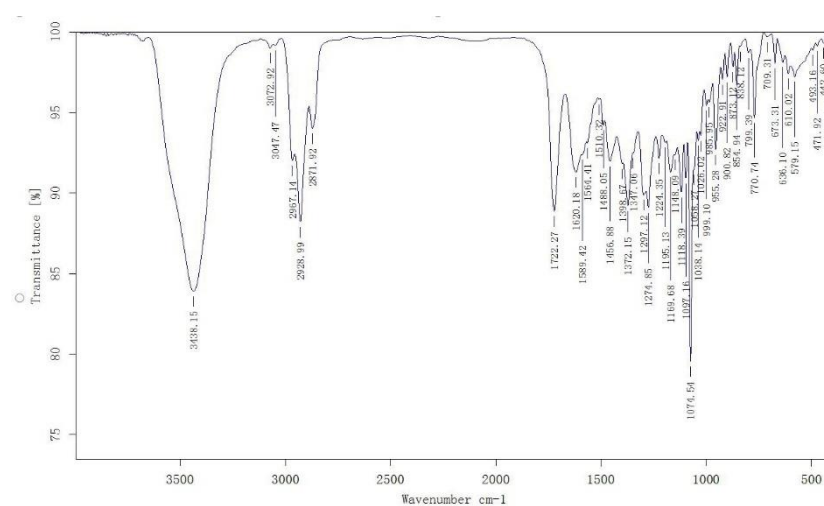

Figure S9. IR spectrum of **1** in methanol.

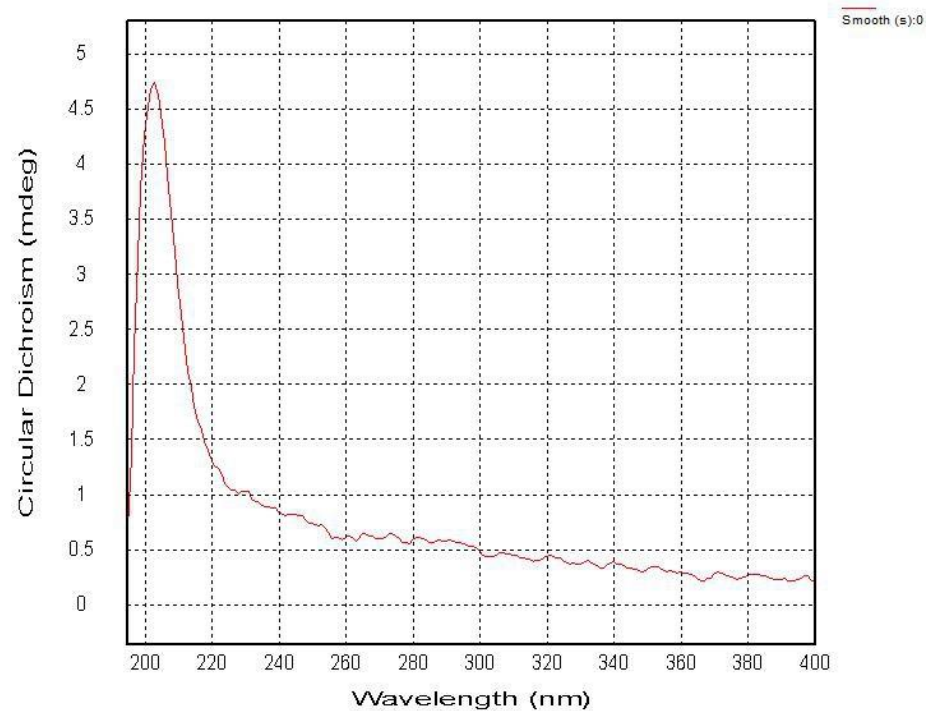

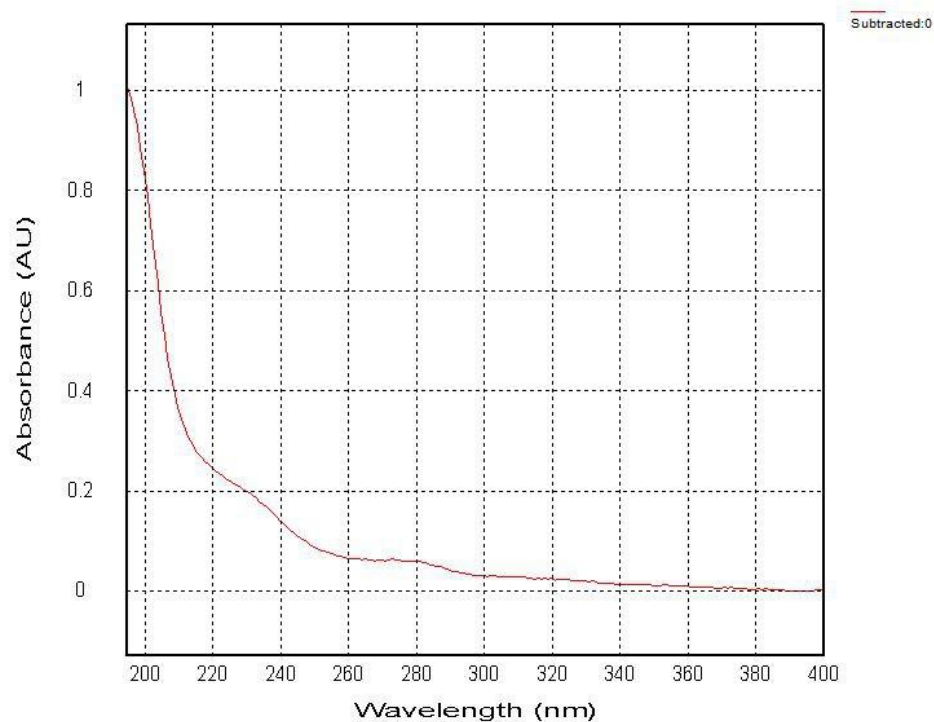

Figure S10. CD spectrum of **1** in methanol.

**Rudolph Research Analytical**

This sample was measured on an Autopol VI, Serial #91058  
Manufactured by Rudolph Research Analytical, Hackettstown, NJ, USA.

Measurement Date : Wednesday, 09-FEB-2022

Set Temperature : 20.0

Time Delay : Disabled

Delay between Measurement : Disabled

| <u>n</u>    | <u>Average</u>   | <u>Std.Dev.</u> | <u>% RSD</u>  | <u>Maximum</u> | <u>Minimum</u> |               |              |                     |              |  |
|-------------|------------------|-----------------|---------------|----------------|----------------|---------------|--------------|---------------------|--------------|--|
| 5           | 36.50            | 0.50            | 1.36          | 37.00          | 36.00          |               |              |                     |              |  |
| <u>S.No</u> | <u>Sample ID</u> | <u>Time</u>     | <u>Result</u> | <u>Scale</u>   | <u>OR °Arc</u> | <u>WLG.nm</u> | <u>Lg.mm</u> | <u>Conc.g/100ml</u> | <u>Temp.</u> |  |
| 1           | 05R38            | 05:37:12 PM     | 36.00         | SR             | 0.072          | 589           | 100.00       | 0.200               | 20.3         |  |
| 2           | 05R38            | 05:37:18 PM     | 36.00         | SR             | 0.072          | 589           | 100.00       | 0.200               | 20.2         |  |
| 3           | 05R38            | 05:37:25 PM     | 36.50         | SR             | 0.073          | 589           | 100.00       | 0.200               | 20.2         |  |
| 4           | 05R38            | 05:37:32 PM     | 37.00         | SR             | 0.074          | 589           | 100.00       | 0.200               | 20.1         |  |
| 5           | 05R38            | 05:37:39 PM     | 37.00         | SR             | 0.074          | 589           | 100.00       | 0.200               | 20.1         |  |

Figure S11. Specific Rotation of **1** in methanol.

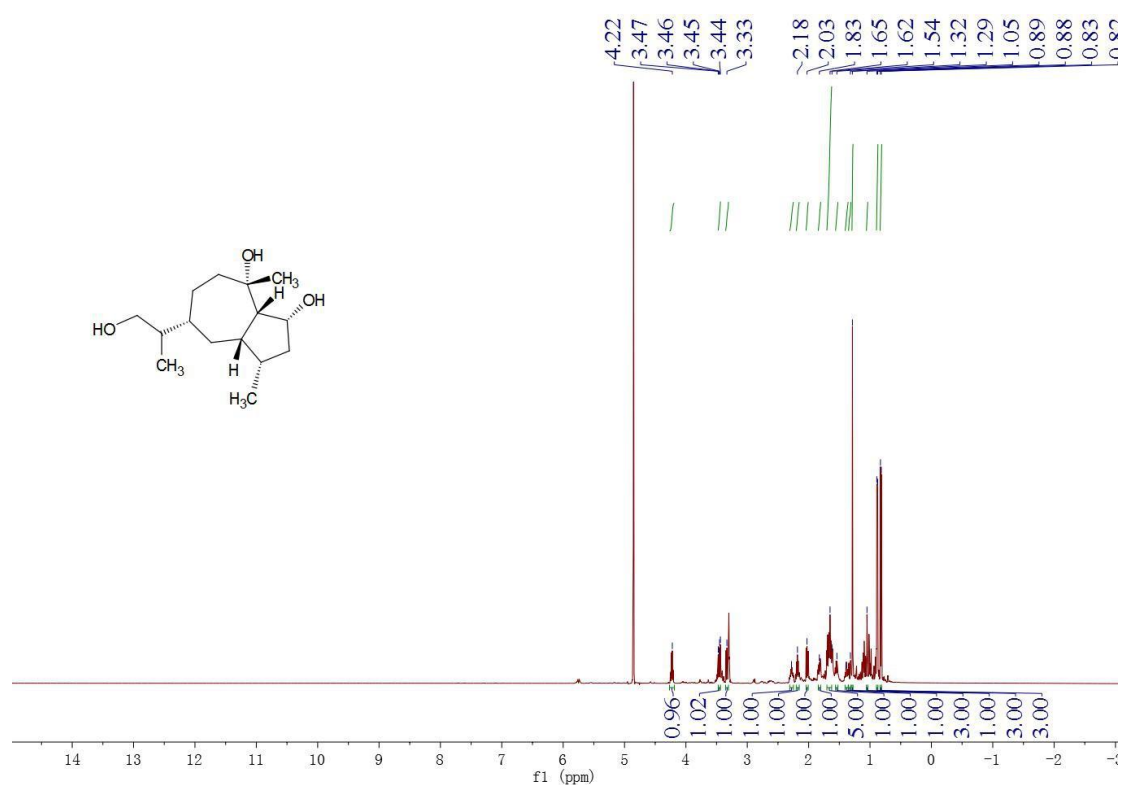

Figure S12. <sup>1</sup>H NMR spectrum of compound 2 in CD<sub>3</sub>OD.

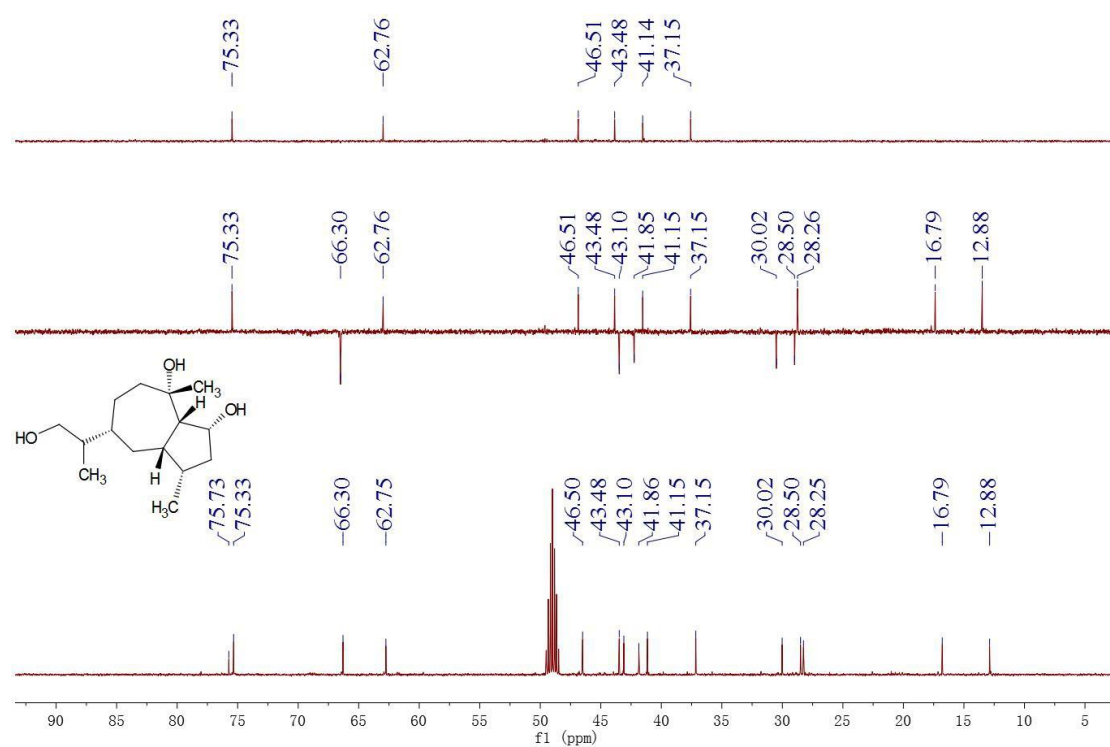

Figure S13. <sup>13</sup>C NMR and DEPT spectrum of compound 2 in CD<sub>3</sub>OD.

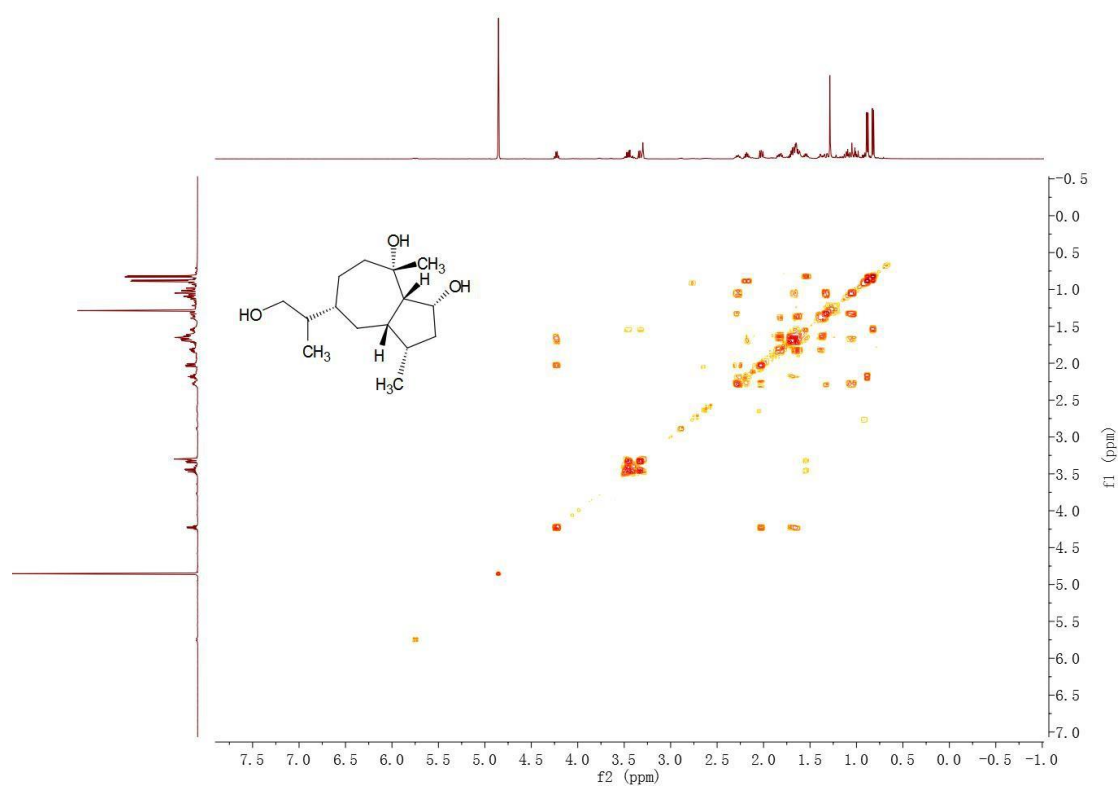

**Figure S14.**  $^1\text{H}$ - $^1\text{H}$  COSY spectrum of compound **2** in  $\text{CD}_3\text{OD}$ .

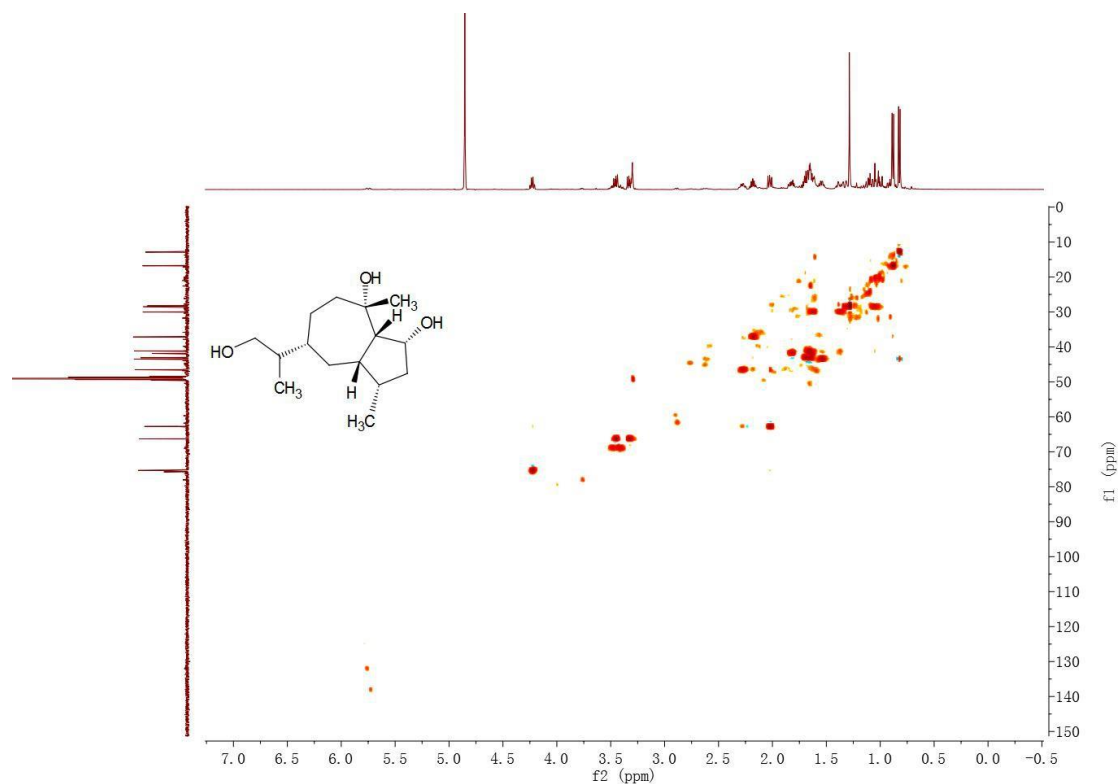

**Figure S15.** HSQC spectrum of compound **2** in  $\text{CD}_3\text{OD}$ .



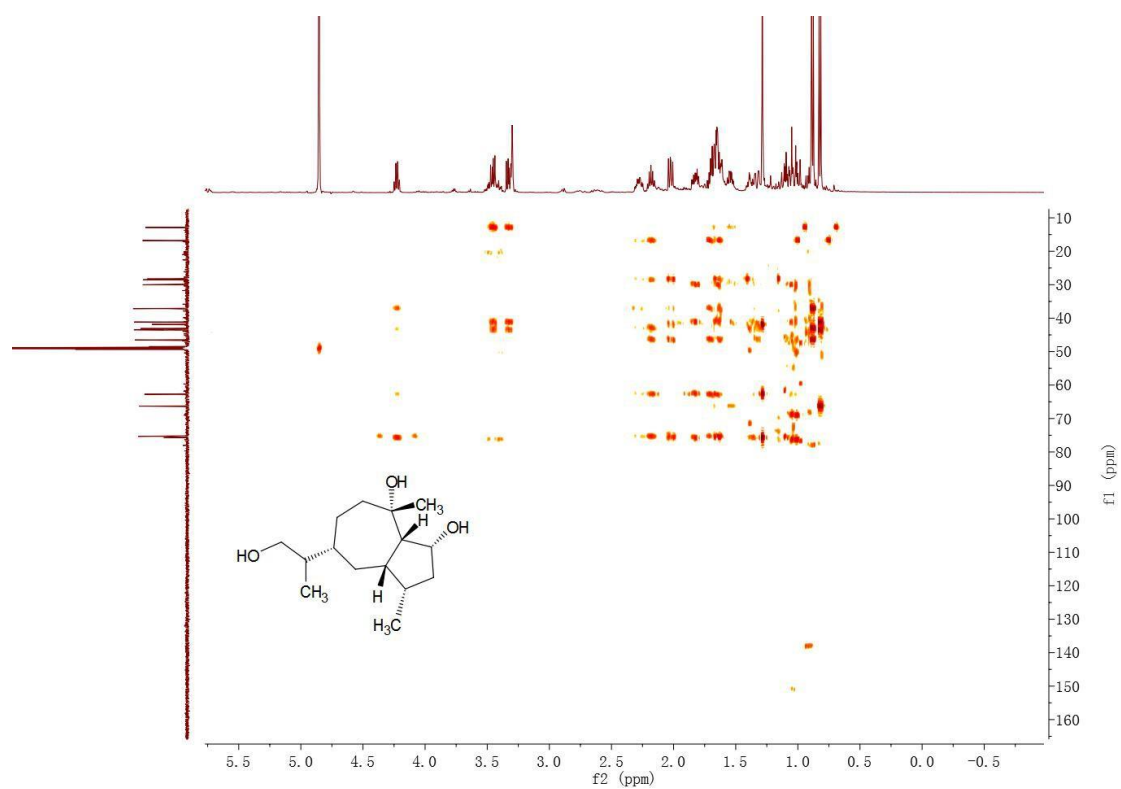

Figure S16. HMBC spectrum of compound 2 in CD<sub>3</sub>OD.

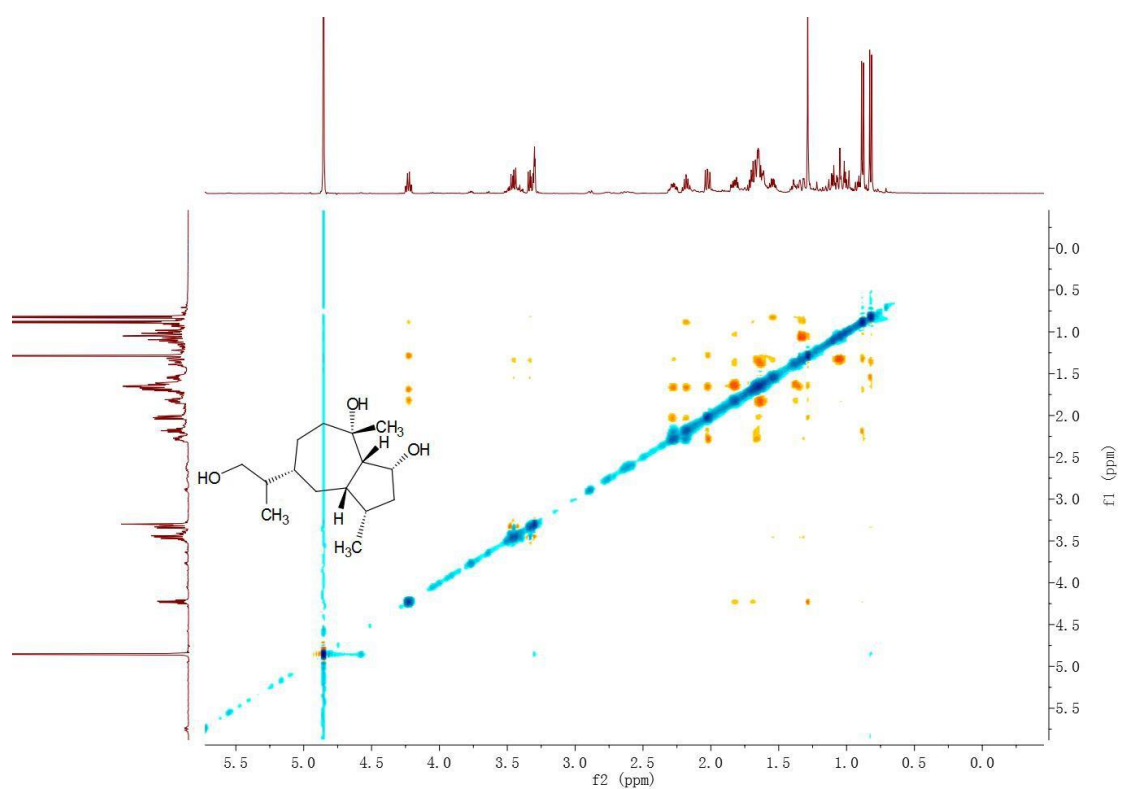

Figure S17. ROESY spectrum of compound 2 in CD<sub>3</sub>OD.

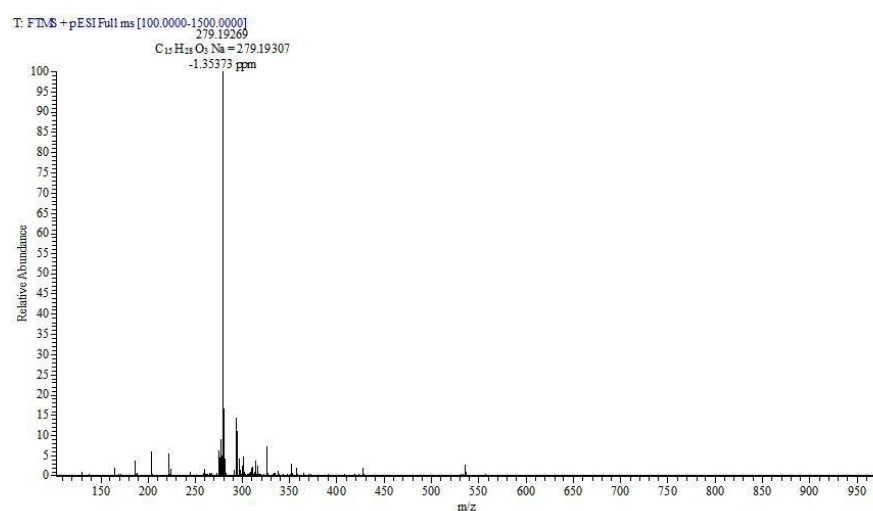

**Figure S18.** HRESIMS spectrum of compound **2**.

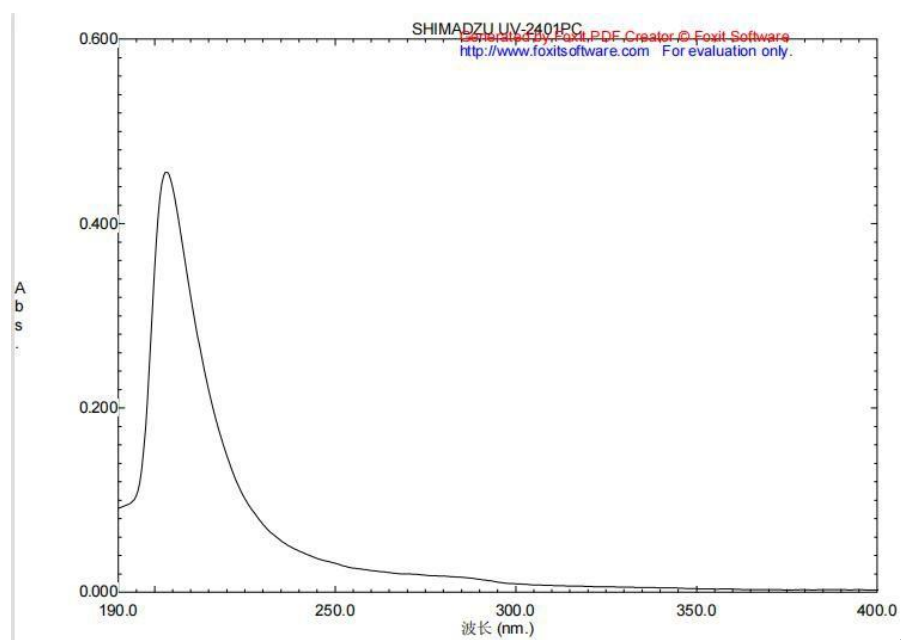

**Figure S19.** UV spectrum of **2** in methanol.

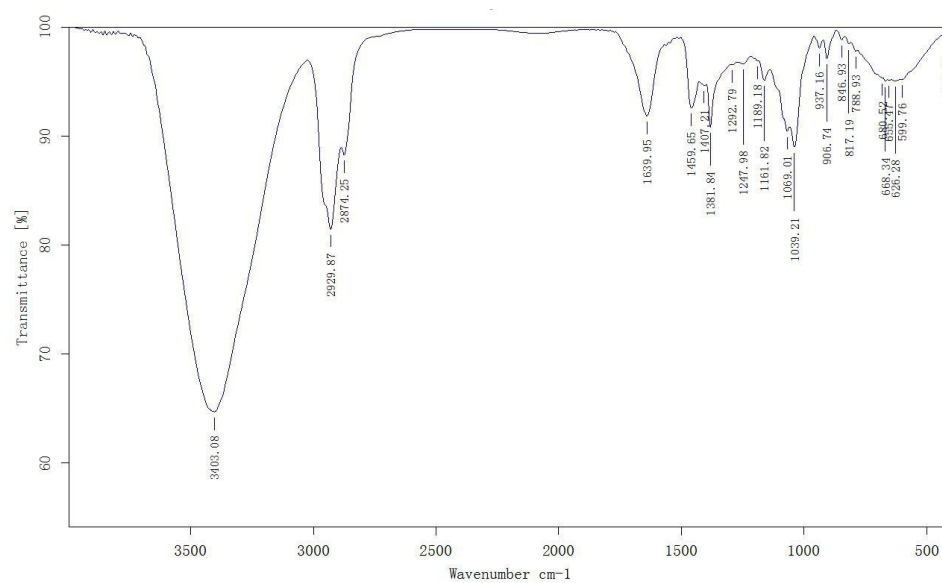

Figure S20. IR spectrum of **2** in methanol.

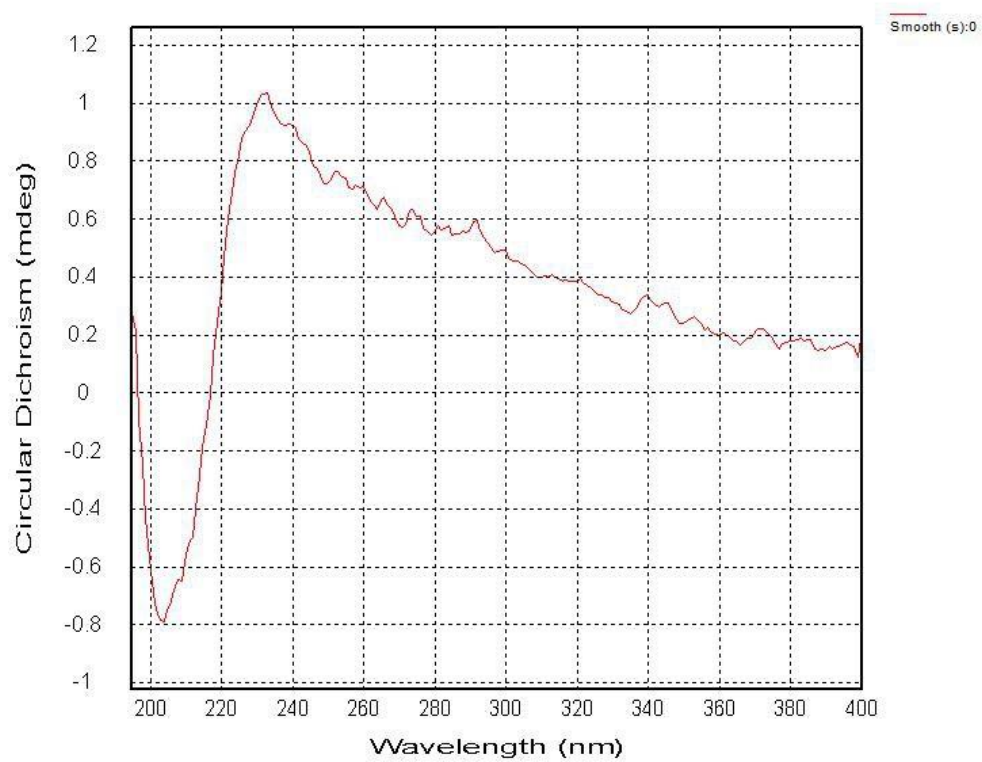

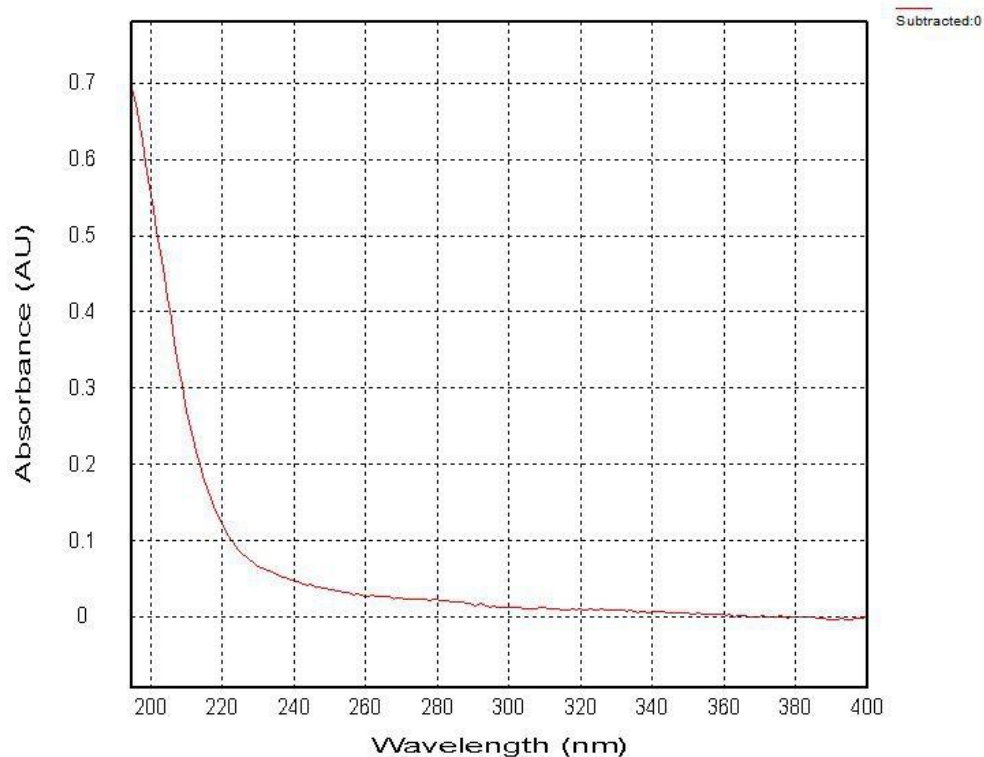

Figure S21. CD spectrum of **2** in methanol.

**Rudolph Research Analytical**

This sample was measured on an Autopol VI, Serial #91058  
Manufactured by Rudolph Research Analytical, Hackettstown, NJ, USA.

Measurement Date : Wednesday, 09-FEB-2022

Set Temperature : 20.0

Time Delay : Disabled

Delay between Measurement : Disabled

| <u>n</u>    | <u>Average</u>   | <u>Std.Dev.</u> | <u>% RSD</u>  | <u>Maximum</u> | <u>Minimum</u> |               |              |                     |              |  |
|-------------|------------------|-----------------|---------------|----------------|----------------|---------------|--------------|---------------------|--------------|--|
| 5           | -2.33            | 0.37            | -15.87        | -1.67          | -2.50          |               |              |                     |              |  |
| <u>S.No</u> | <u>Sample ID</u> | <u>Time</u>     | <u>Result</u> | <u>Scale</u>   | <u>OR °Arc</u> | <u>WLG.nm</u> | <u>Lg.mm</u> | <u>Conc.g/100ml</u> | <u>Temp.</u> |  |
| 1           | 05R47            | 05:53:55 PM     | -1.67         | SR             | -0.002         | 589           | 100.00       | 0.120               | 20.1         |  |
| 2           | 05R47            | 05:54:02 PM     | -2.50         | SR             | -0.003         | 589           | 100.00       | 0.120               | 20.1         |  |
| 3           | 05R47            | 05:54:08 PM     | -2.50         | SR             | -0.003         | 589           | 100.00       | 0.120               | 20.1         |  |
| 4           | 05R47            | 05:54:16 PM     | -2.50         | SR             | -0.003         | 589           | 100.00       | 0.120               | 20.0         |  |
| 5           | 05R47            | 05:54:22 PM     | -2.50         | SR             | -0.003         | 589           | 100.00       | 0.120               | 20.0         |  |

Figure S22. Specific Rotation of **2** in methanol.

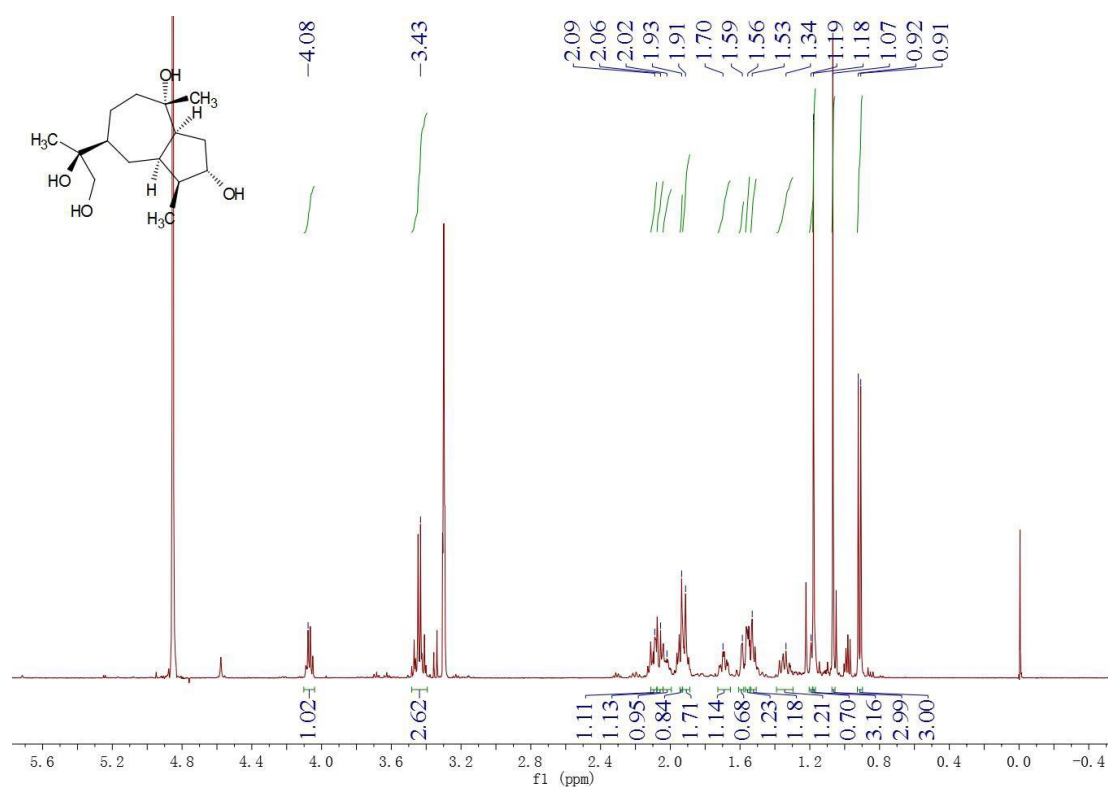

Figure S23. <sup>1</sup>H NMR spectrum of compound 3 in CD<sub>3</sub>OD.

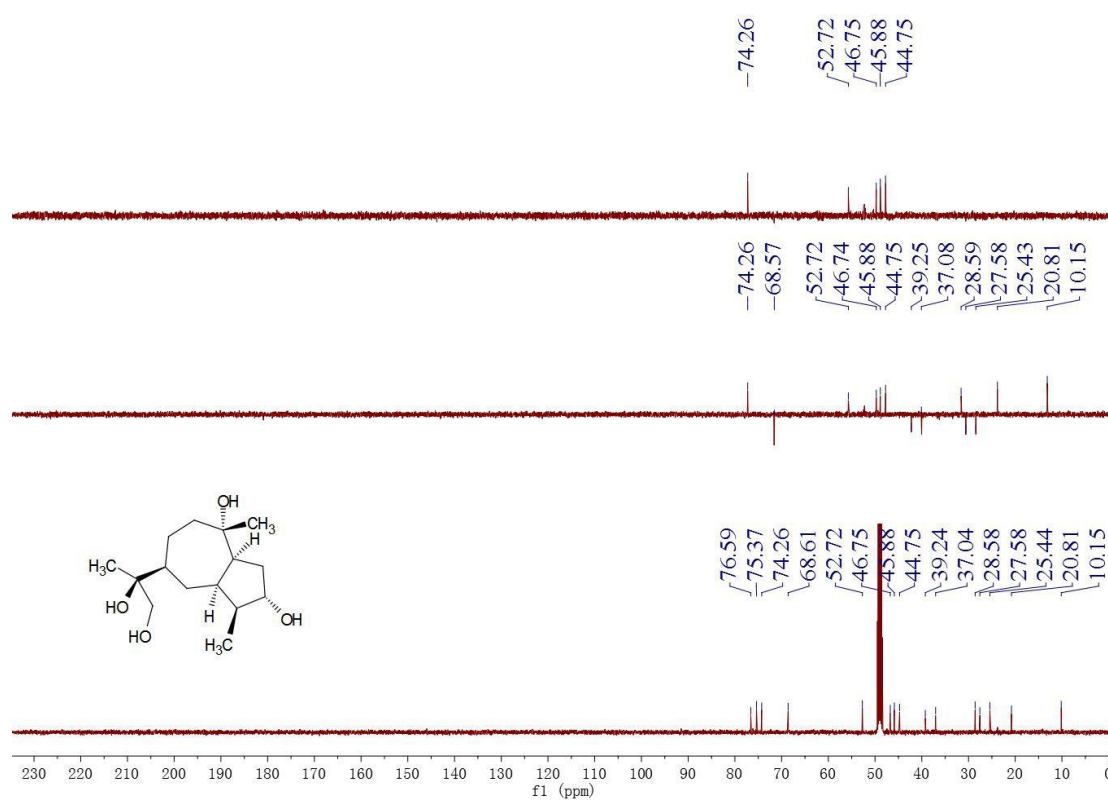

Figure S24. <sup>13</sup>C NMR and DEPT spectrum of compound 3 in CD<sub>3</sub>OD.

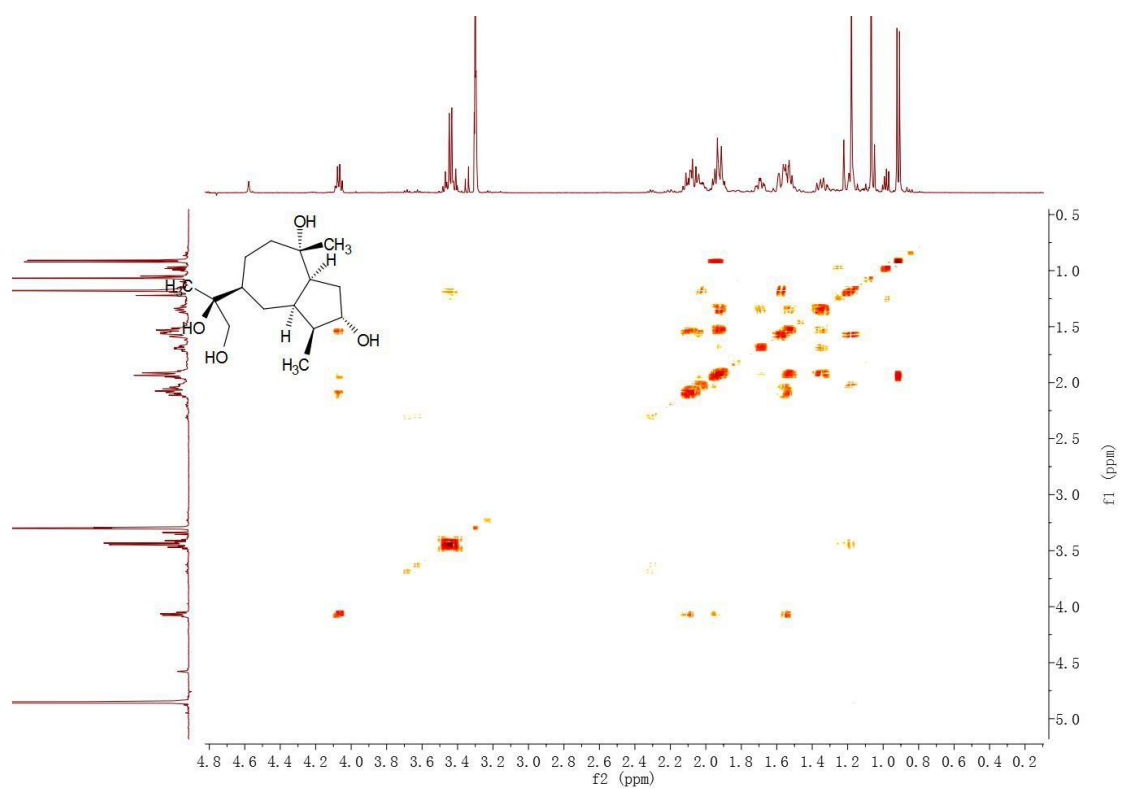

**Figure S25.**  $^1\text{H}$ - $^1\text{H}$  COSY spectrum of compound **3** in  $\text{CD}_3\text{OD}$ .

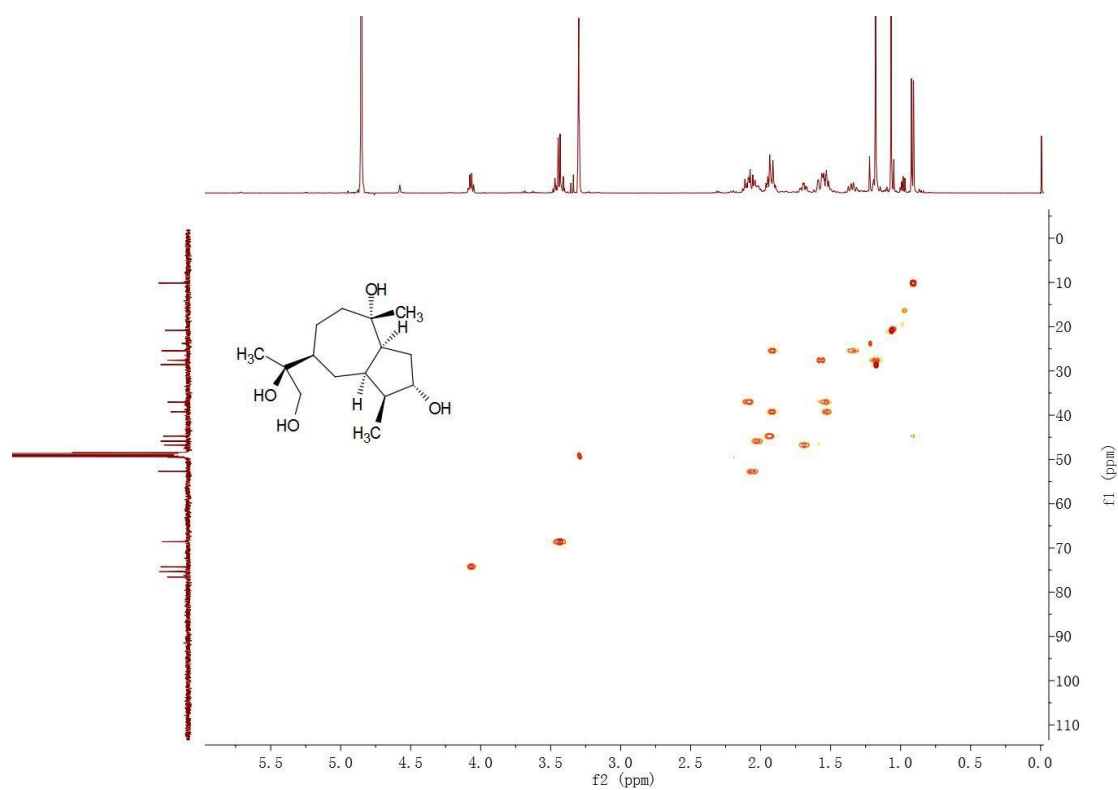

**Figure S26.** HSQC spectrum of compound **3** in  $\text{CD}_3\text{OD}$ .

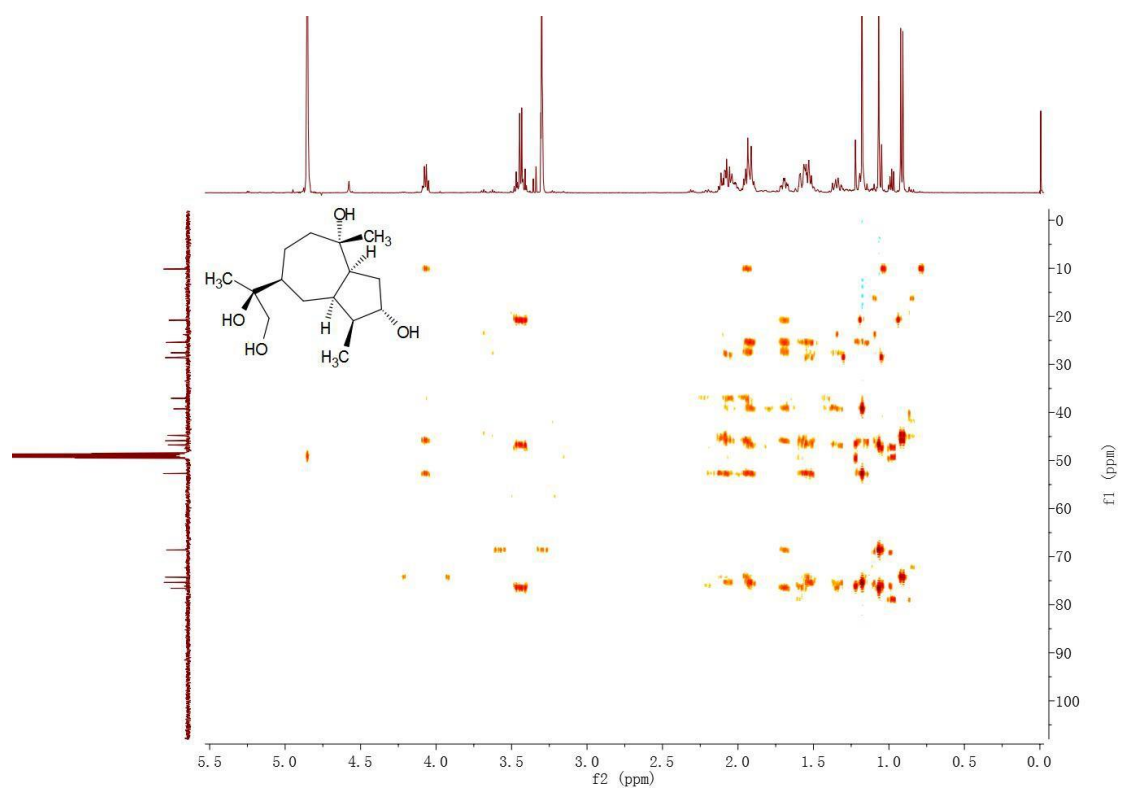

Figure S27. HMBC spectrum of compound 3 in  $\text{CD}_3\text{OD}$ .

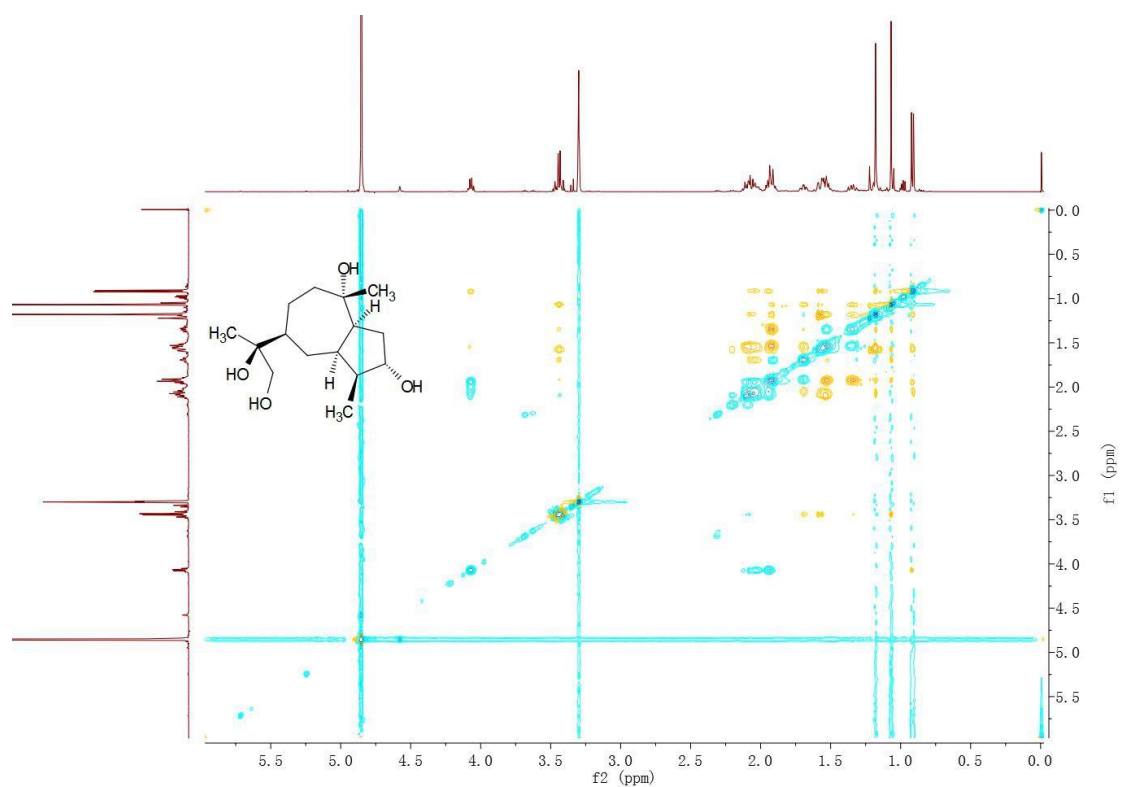

Figure S28. ROESY spectrum of compound 3 in  $\text{CD}_3\text{OD}$ .

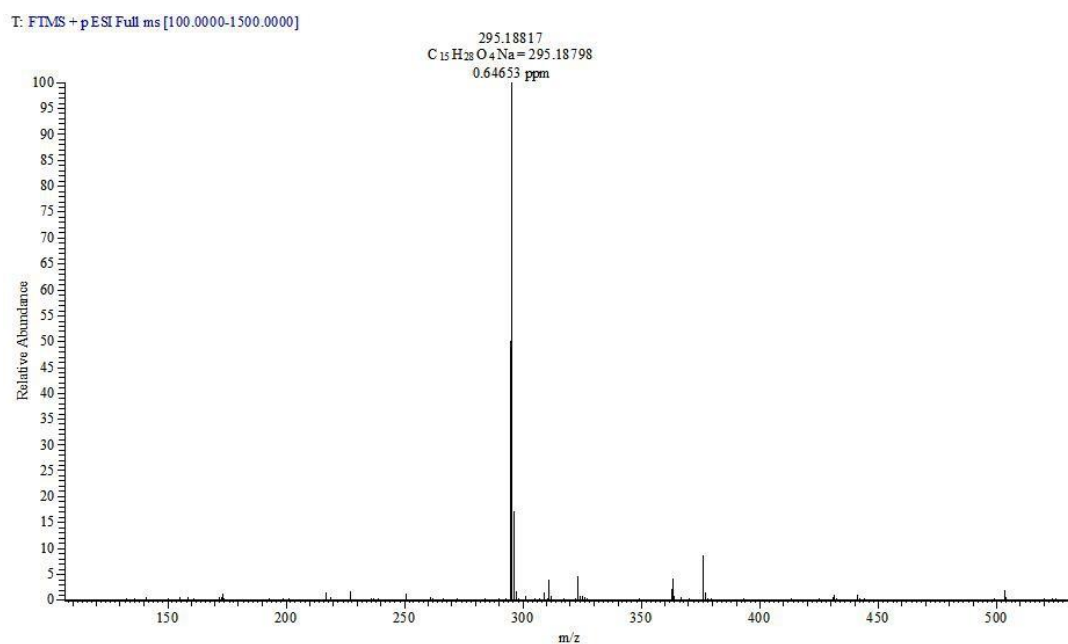

Figure S29. HRESIMS spectrum of compound 3.

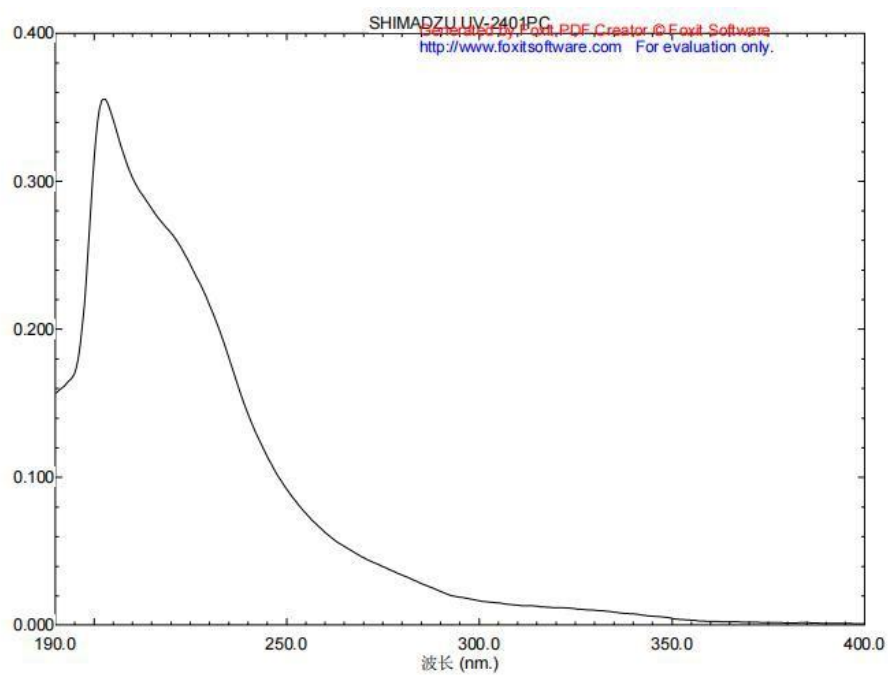

Figure S30. UV spectrum of 3 in methanol.



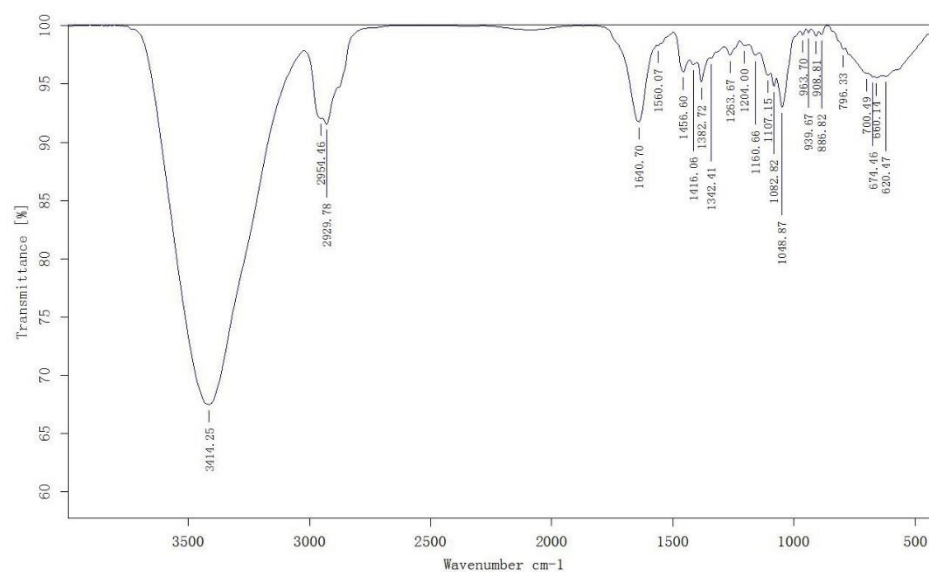

Figure S31. IR spectrum of 3 in methanol.

#### Rudolph Research Analytical

This sample was measured on an Autopol VI, Serial #91058  
Manufactured by Rudolph Research Analytical, Hackettstown, NJ, USA.

Measurement Date : Saturday, 28-MAY-2022

Set Temperature : OFF

Time Delay : Disabled

Delay between Measurement : Disabled

| <u>n</u>    | <u>Average</u>   | <u>Std.Dev.</u> | <u>% RSD</u>  | <u>Maximum</u> | <u>Minimum</u> |               |              |                     |              |  |
|-------------|------------------|-----------------|---------------|----------------|----------------|---------------|--------------|---------------------|--------------|--|
| 5           | -10.78           | 0.26            | -2.41         | -10.40         | -11.10         |               |              |                     |              |  |
| <u>S.No</u> | <u>Sample ID</u> | <u>Time</u>     | <u>Result</u> | <u>Scale</u>   | <u>OR °Arc</u> | <u>WLG.nm</u> | <u>Lq.mm</u> | <u>Conc.g/100ml</u> | <u>Temp.</u> |  |
| 1           | 05R14            | 11:10:52 AM     | -10.90        | SR             | -0.0109        | 589           | 100.00       | 0.100               | 24.4         |  |
| 2           | 05R14            | 11:11:01 AM     | -10.40        | SR             | -0.0104        | 589           | 100.00       | 0.100               | 24.4         |  |
| 3           | 05R14            | 11:11:09 AM     | -10.80        | SR             | -0.0108        | 589           | 100.00       | 0.100               | 24.4         |  |
| 4           | 05R14            | 11:11:17 AM     | -11.10        | SR             | -0.0111        | 589           | 100.00       | 0.100               | 24.4         |  |
| 5           | 05R14            | 11:11:25 AM     | -10.70        | SR             | -0.0107        | 589           | 100.00       | 0.100               | 24.4         |  |

Figure S32. Specific Rotation of 3 in methanol.

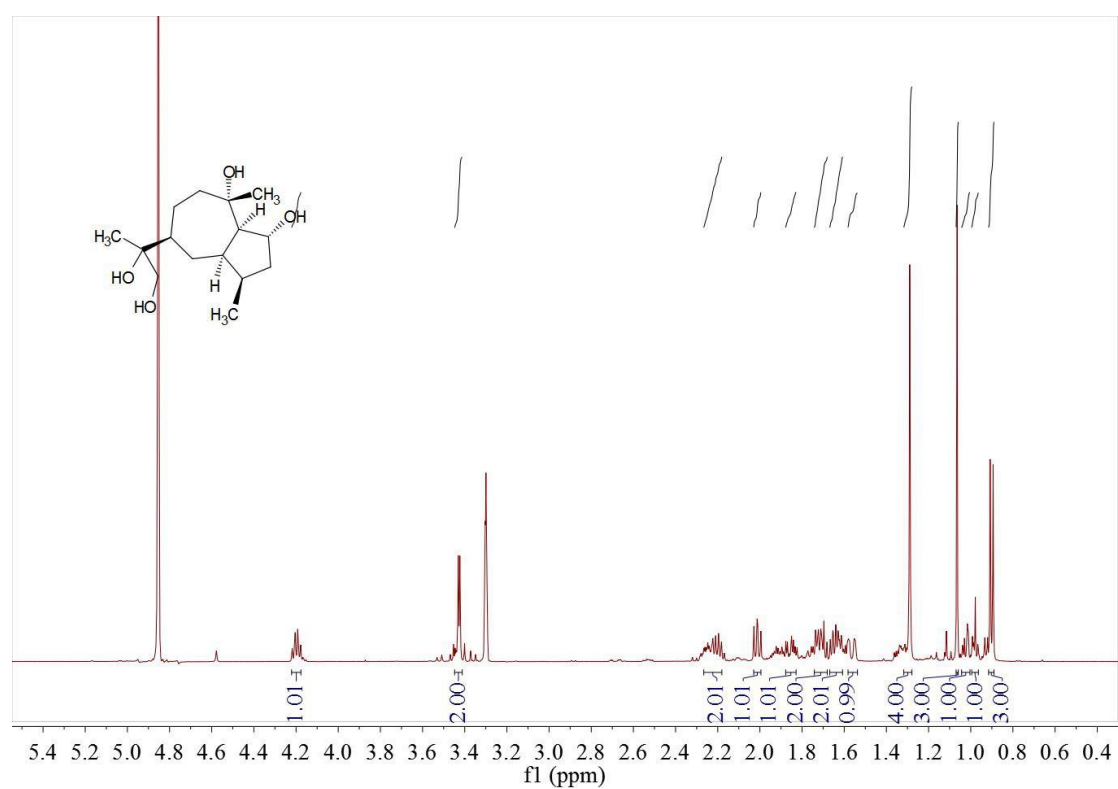

Figure S33. <sup>1</sup>H NMR spectrum of compound 4 in CD<sub>3</sub>OD.

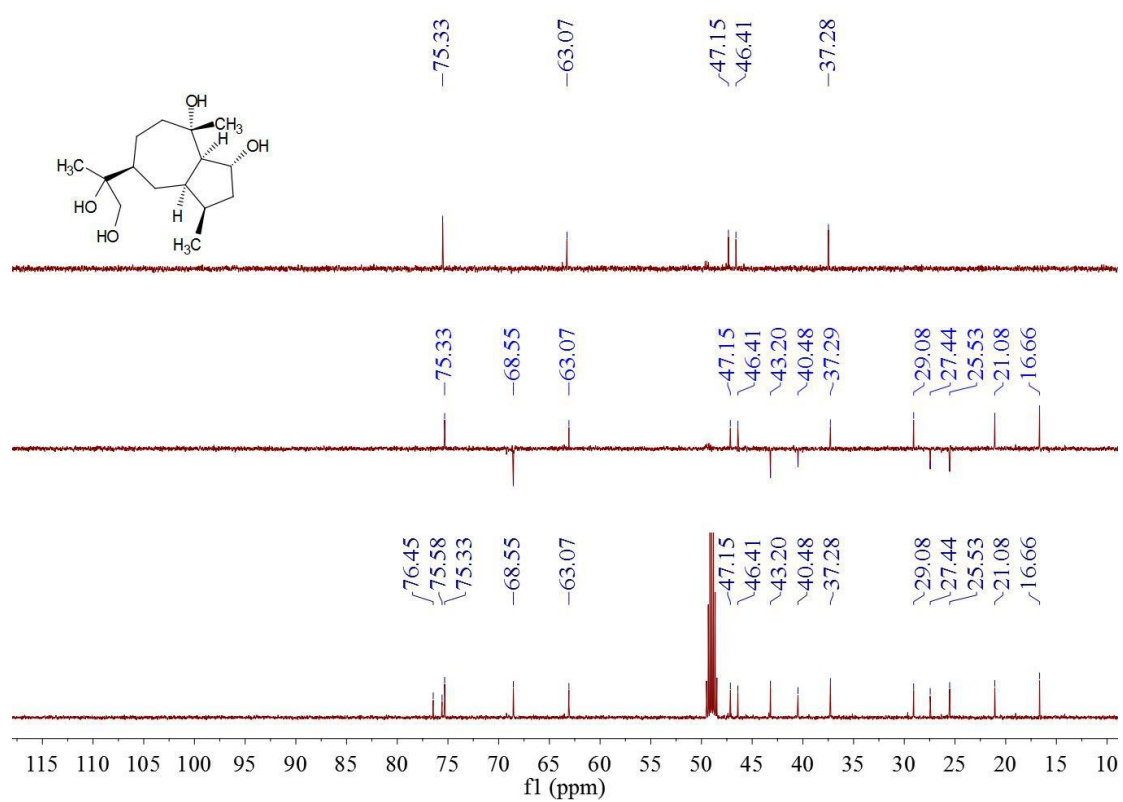

Figure S34. <sup>13</sup>C NMR and DEPT spectrum of compound 4 in CD<sub>3</sub>OD.

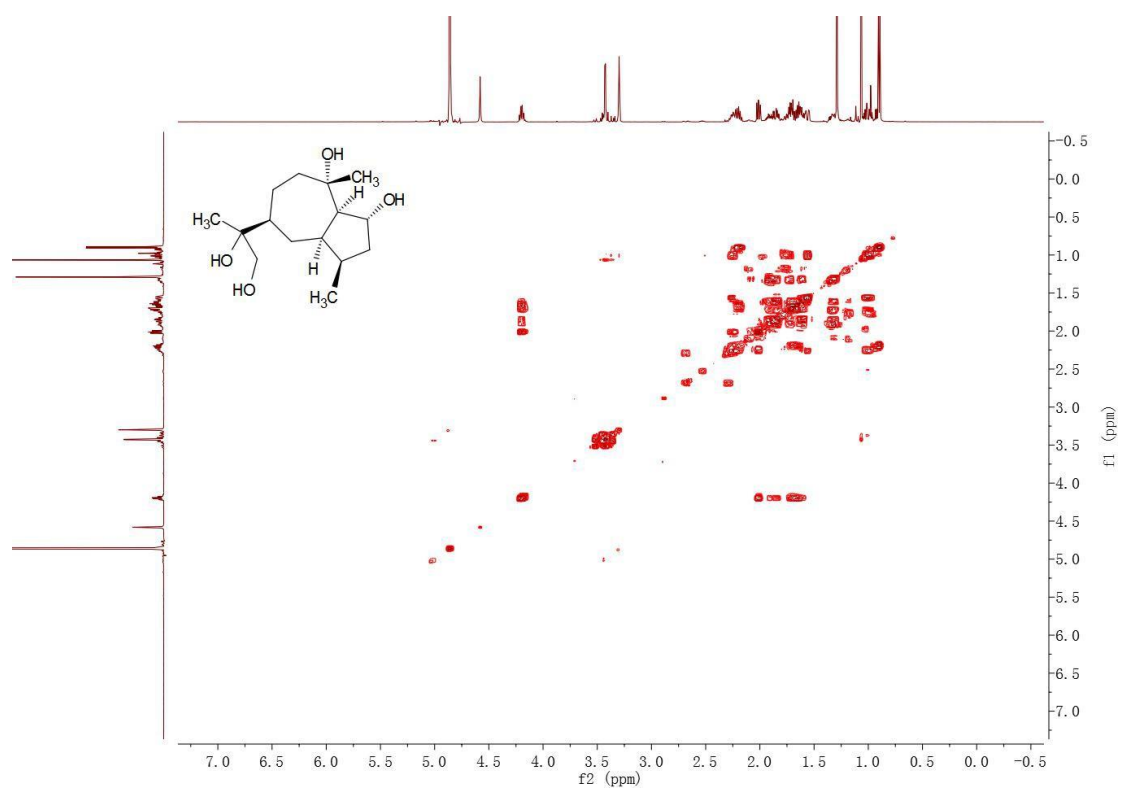

**Figure S35.**  $^1\text{H}$ - $^1\text{H}$  COSY spectrum of compound **4** in  $\text{CD}_3\text{OD}$ .

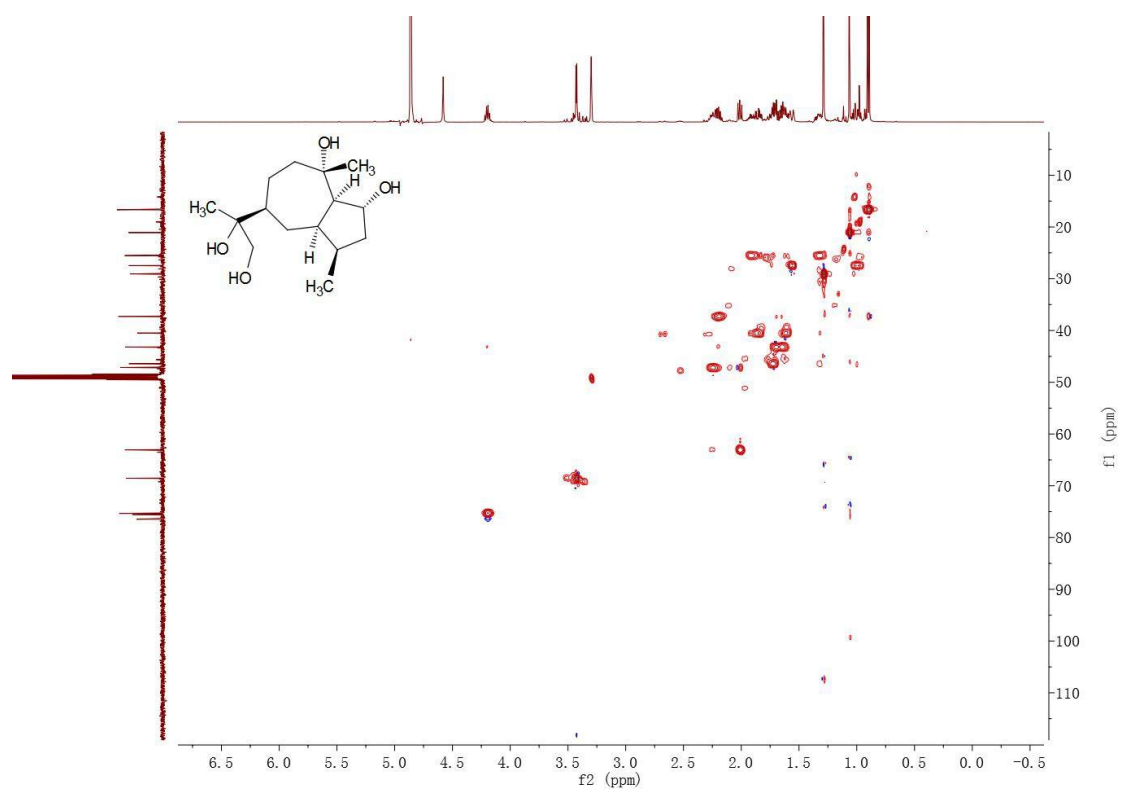

**Figure S36.** HSQC spectrum of compound **4** in  $\text{CD}_3\text{OD}$ .

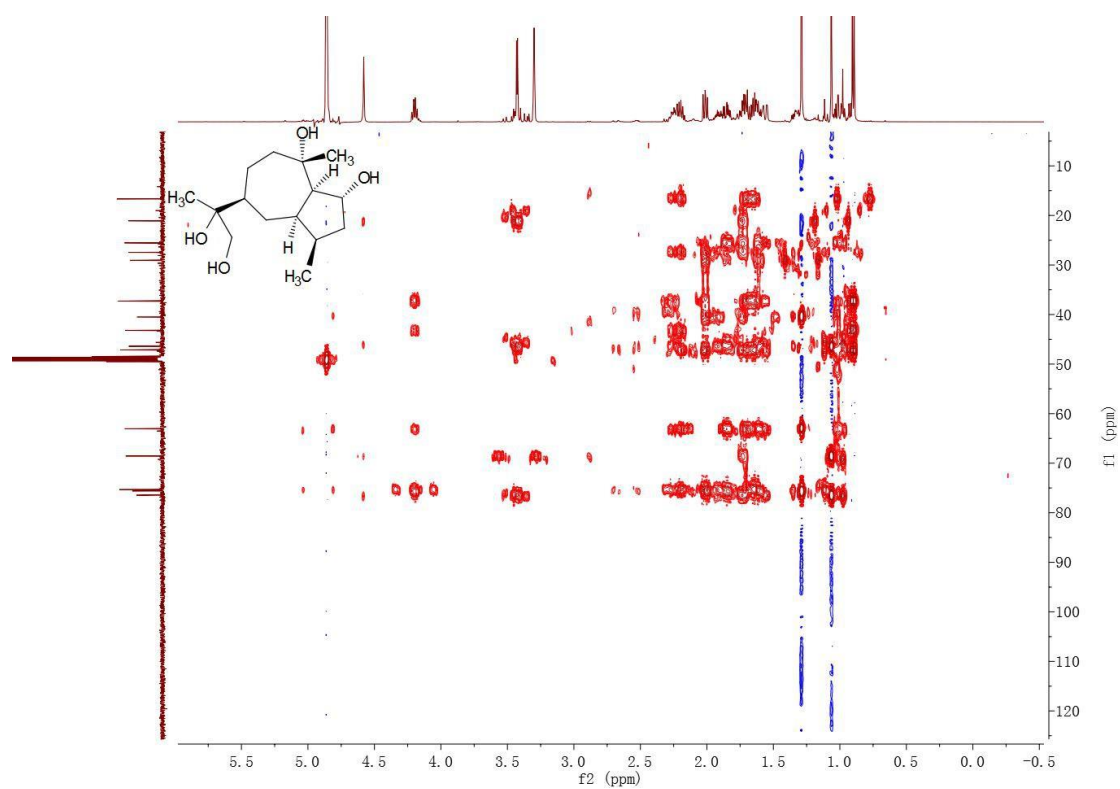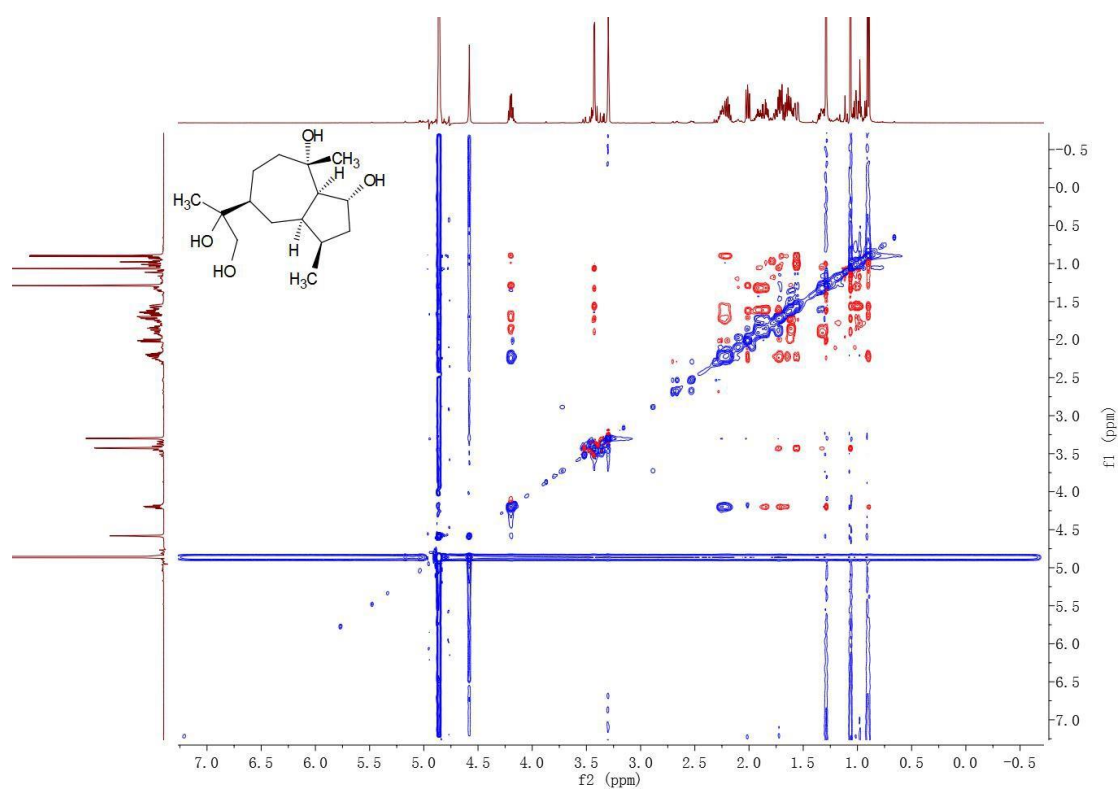

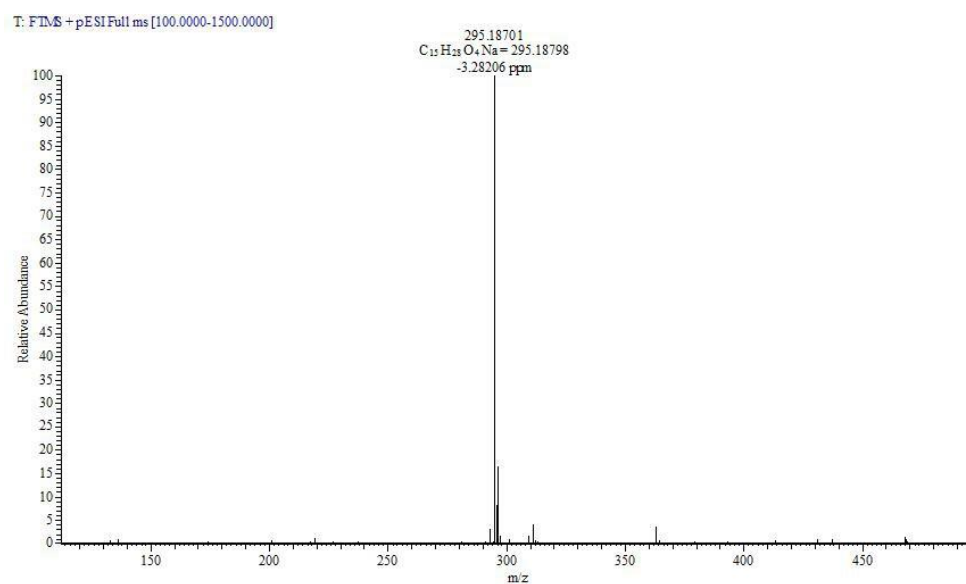

Figure S39. HRESIMS spectrum of compound 4.

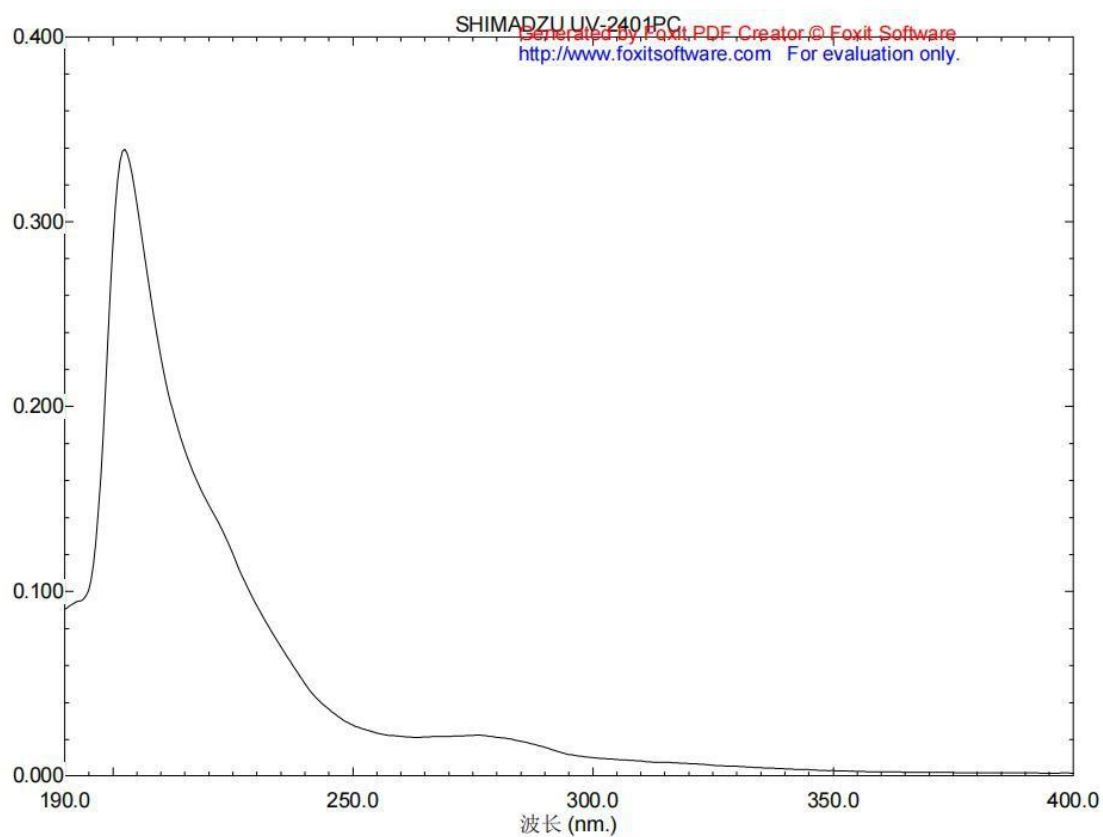

Figure S40. UV spectrum of 4 in methanol.

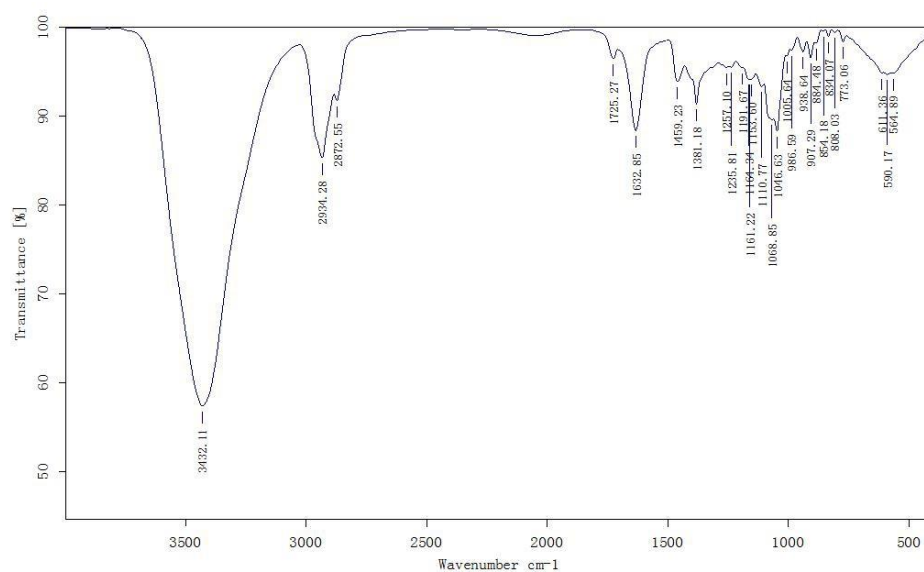

Figure S41. IR spectrum of **4** in methanol.

#### **Rudolph Research Analytical**

This sample was measured on an Autopol VI, Serial #91058  
Manufactured by Rudolph Research Analytical, Hackettstown, NJ, USA.

Measurement Date : Tuesday, 30-AUG-2022

Set Temperature : OFF

Time Delay : Disabled

Delay between Measurement : Disabled

| <b>n</b>    | <b>Average</b>   | <b>Std.Dev.</b> | <b>% RSD</b>  | <b>Maximum</b> | <b>Minimum</b> |               |              |                     |              |  |
|-------------|------------------|-----------------|---------------|----------------|----------------|---------------|--------------|---------------------|--------------|--|
| 5           | -1.88            | 0.64            | -34.04        | -0.75          | -2.33          |               |              |                     |              |  |
| <b>S.No</b> | <b>Sample ID</b> | <b>Time</b>     | <b>Result</b> | <b>Scale</b>   | <b>OR °Arc</b> | <b>WLG.nm</b> | <b>Lq.mm</b> | <b>Conc.g/100ml</b> | <b>Temp.</b> |  |
| 1           | 05R49            | 10:50:31 AM     | -0.75         | SR             | -0.0009        | 589           | 100.00       | 0.120               | 24.7         |  |
| 2           | 05R49            | 10:50:40 AM     | -2.08         | SR             | -0.0025        | 589           | 100.00       | 0.120               | 24.7         |  |
| 3           | 05R49            | 10:50:52 AM     | -2.17         | SR             | -0.0026        | 589           | 100.00       | 0.120               | 24.6         |  |
| 4           | 05R49            | 10:51:00 AM     | -2.33         | SR             | -0.0028        | 589           | 100.00       | 0.120               | 24.6         |  |
| 5           | 05R49            | 10:51:09 AM     | -2.08         | SR             | -0.0025        | 589           | 100.00       | 0.120               | 24.6         |  |

Figure S42. Specific Rotation of **4** in methanol.

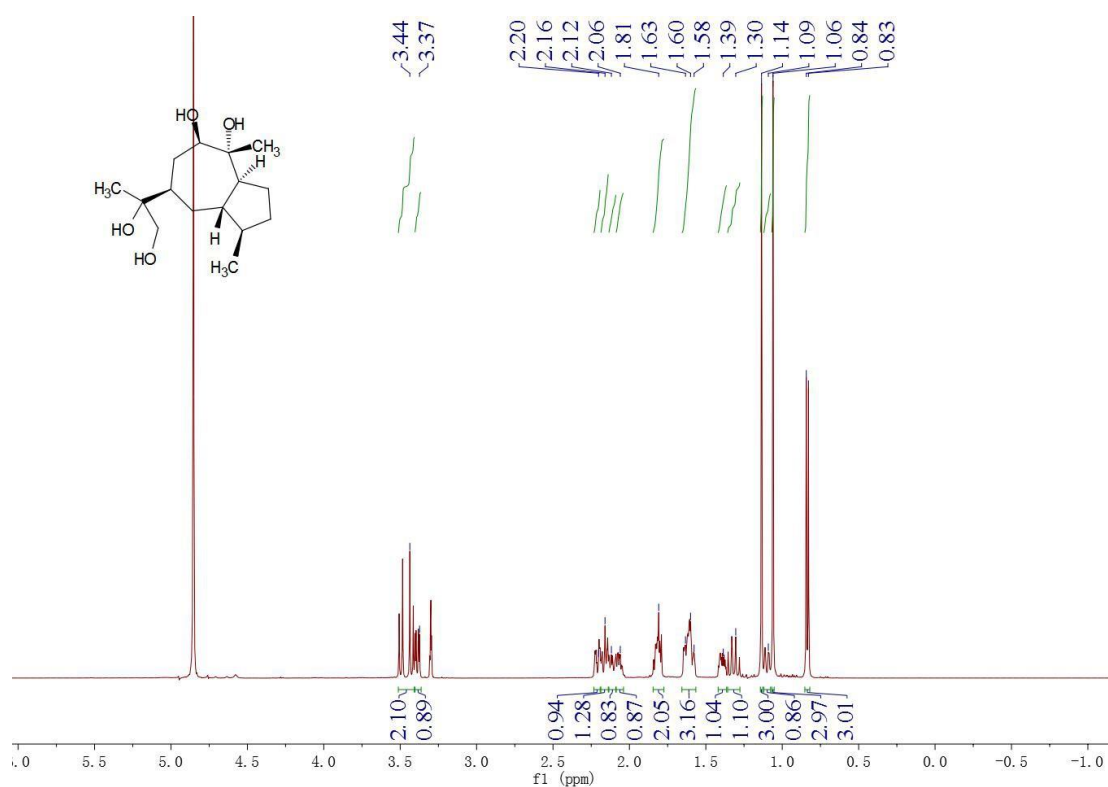

Figure S43. <sup>1</sup>H NMR spectrum of compound 5 in CD<sub>3</sub>OD.

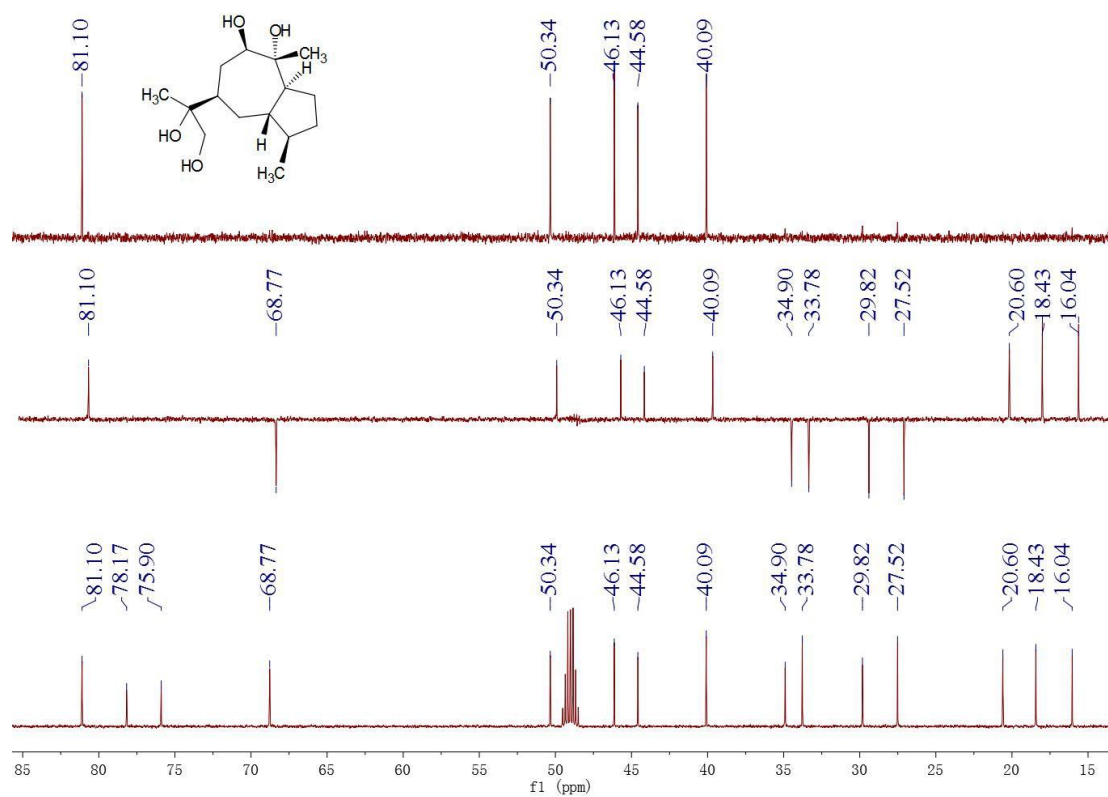

Figure S44. <sup>13</sup>C NMR and DEPT spectrum of compound 5 in CD<sub>3</sub>OD.

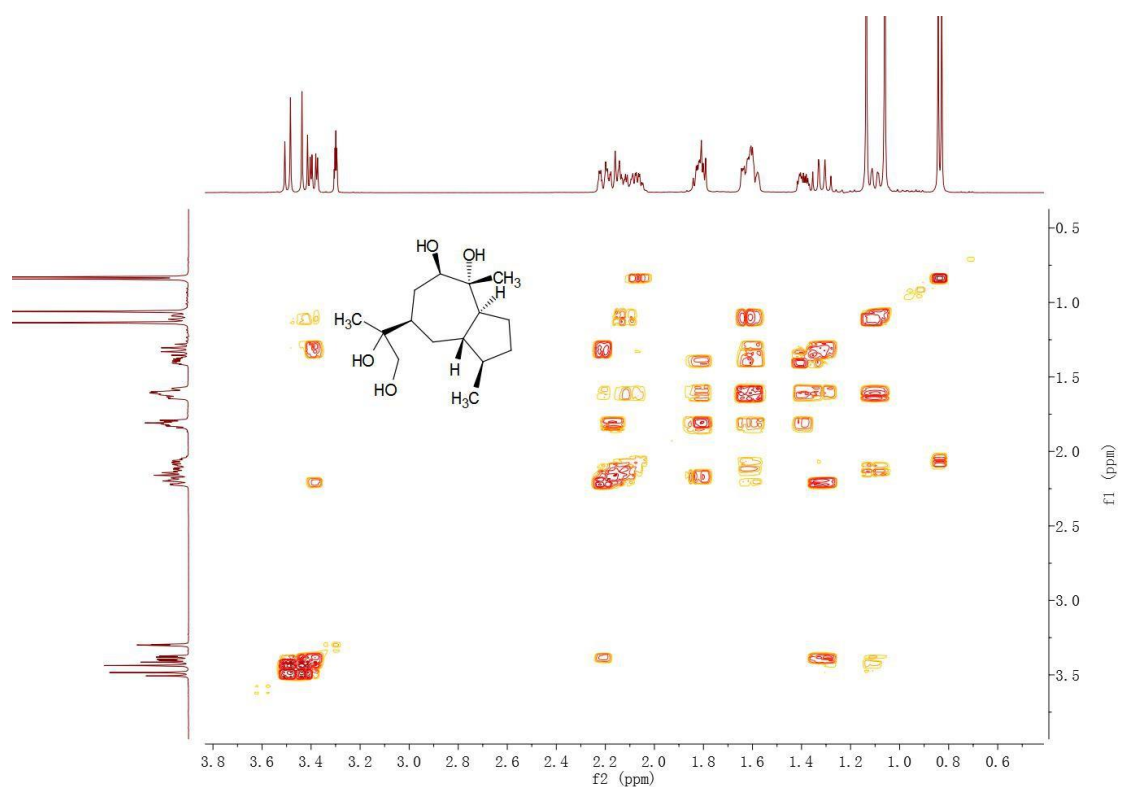

**Figure S45.**  $^1\text{H}$ - $^1\text{H}$  COSY spectrum of compound **5** in  $\text{CD}_3\text{OD}$ .

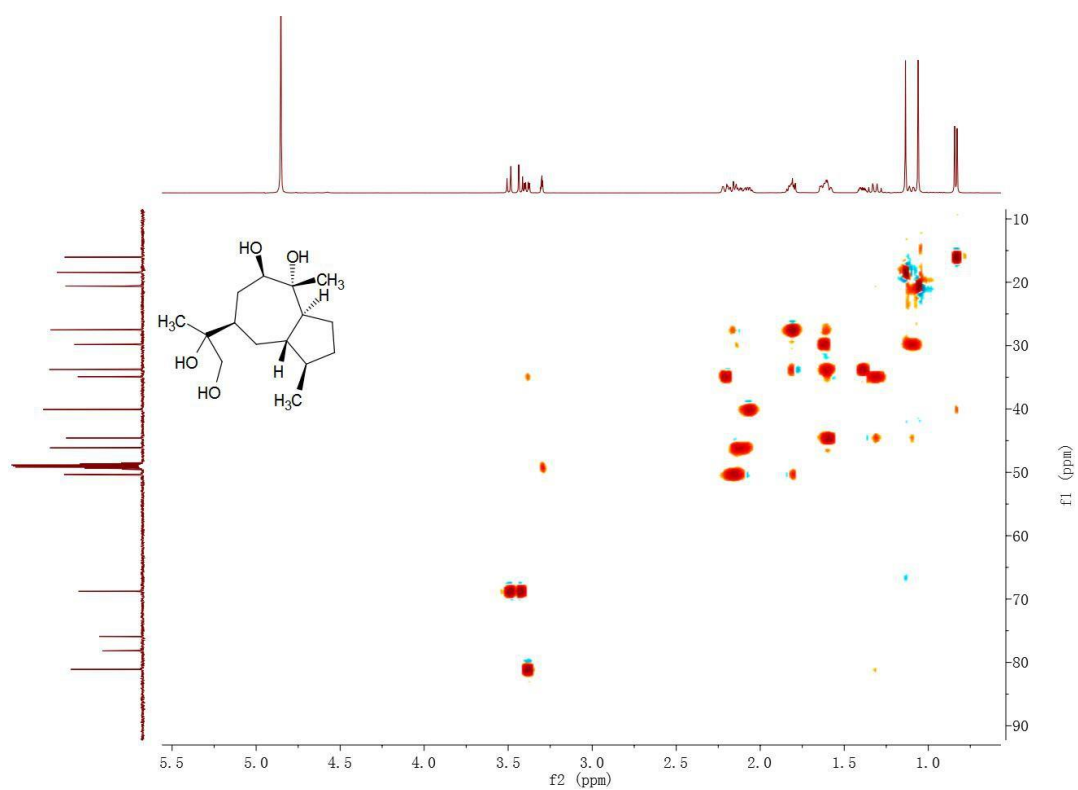

**Figure S46.** HSQC spectrum of compound **5** in  $\text{CD}_3\text{OD}$ .



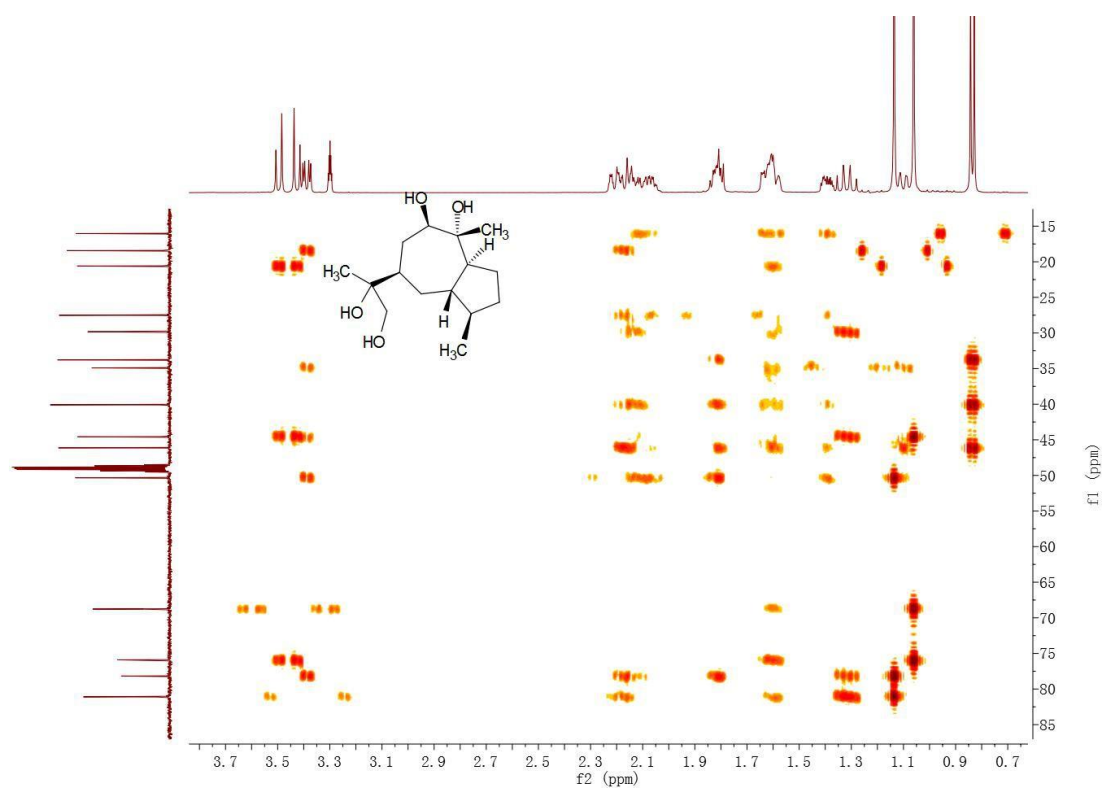

Figure S47. HMBC spectrum of compound 5 in CD<sub>3</sub>OD.

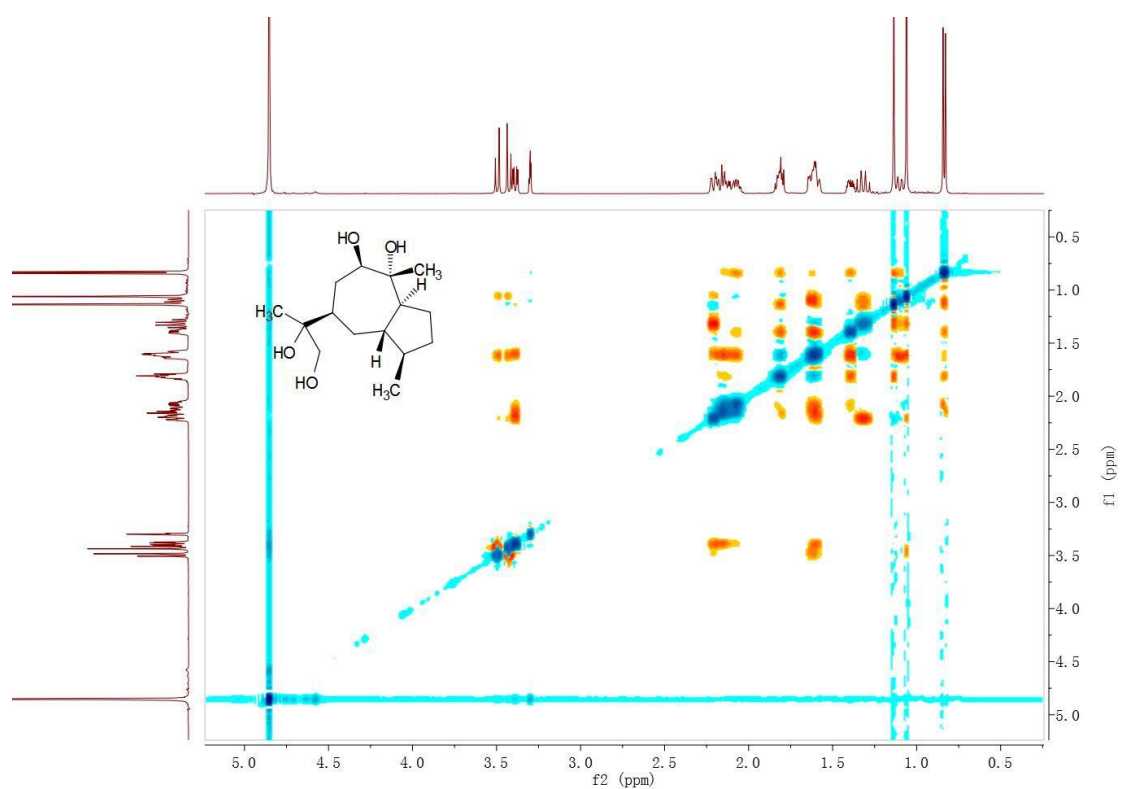

Figure S48. ROESY spectrum of compound 5 in CD<sub>3</sub>OD.

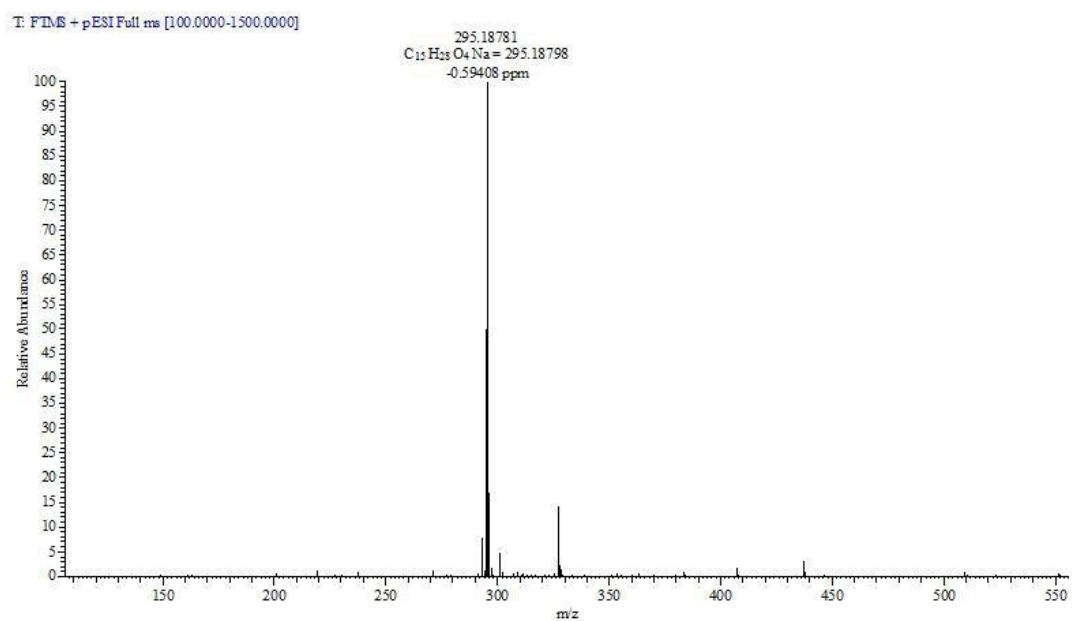

Figure S49. HRESIMS spectrum of compound 5.

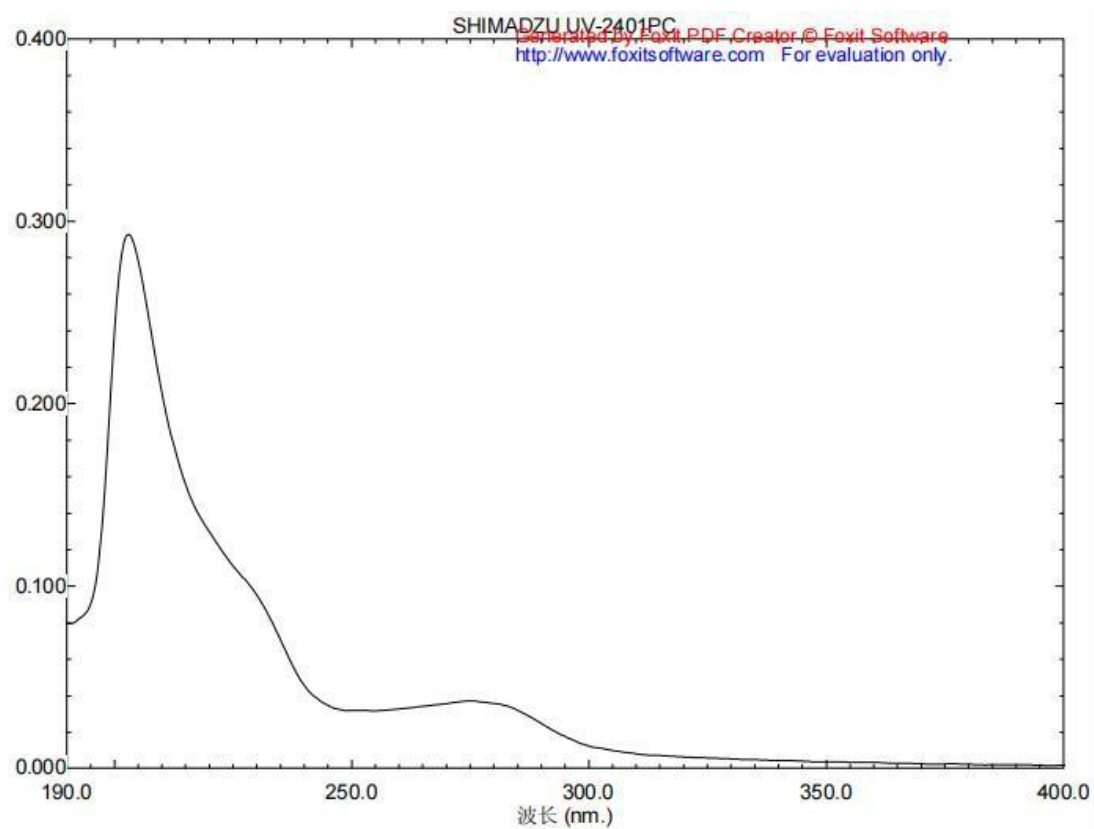

Figure S50. UV spectrum of 5 in methanol.

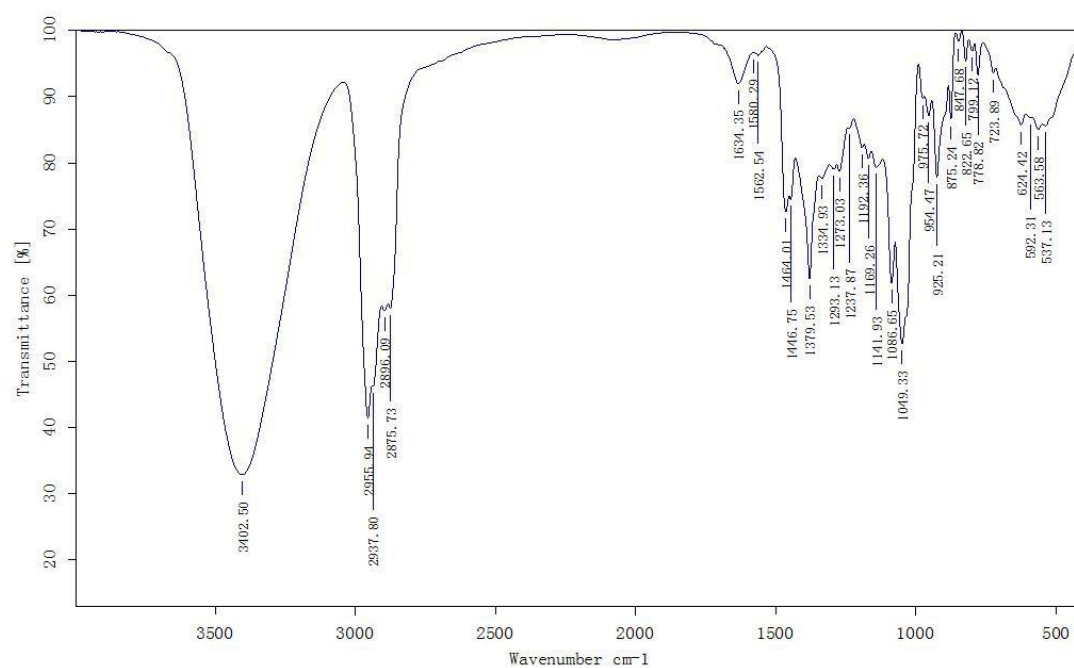

Figure S51. IR spectrum of 5 in methanol.

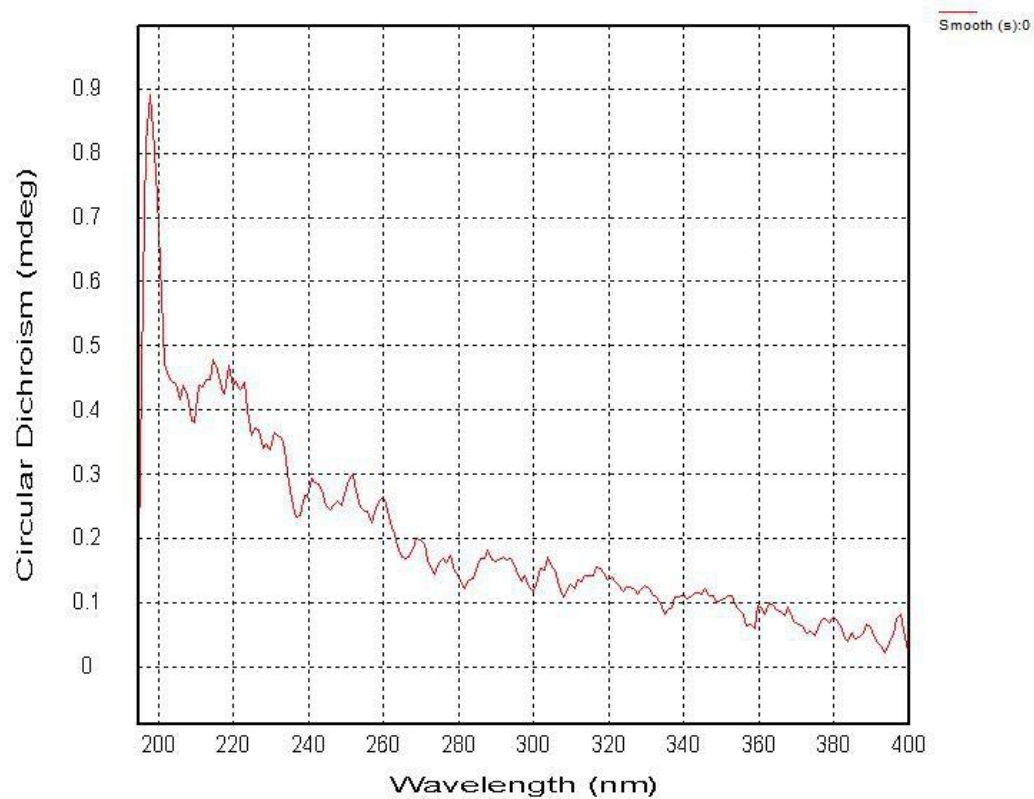

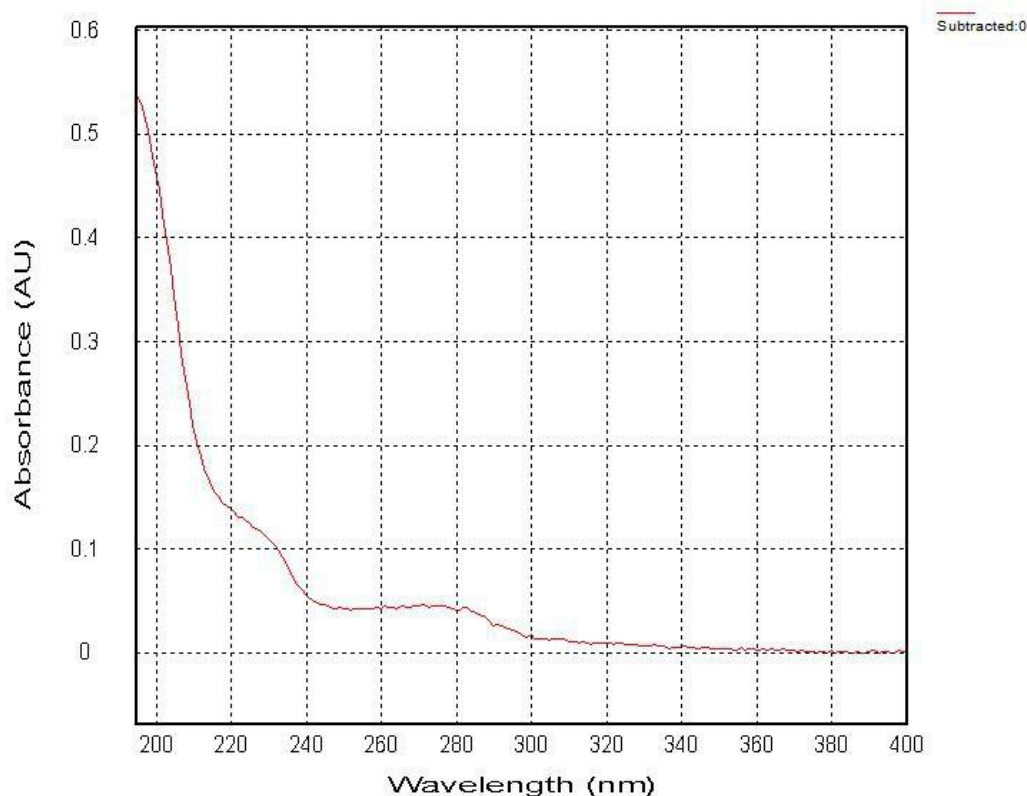

Figure S52. CD spectrum of 5 in methanol.

#### **Rudolph Research Analytical**

This sample was measured on an Autopol VI, Serial #91058  
Manufactured by Rudolph Research Analytical, Hackettstown, NJ, USA.

Measurement Date : Thursday, 07-APR-2022

Set Temperature : 20.0

Time Delay : Disabled

Delay between Measurement : Disabled

| <u>n</u>    | <u>Average</u>   | <u>Std.Dev.</u> | <u>% RSD</u>  | <u>Maximum</u> | <u>Minimum</u> |               |              |                     |              |  |
|-------------|------------------|-----------------|---------------|----------------|----------------|---------------|--------------|---------------------|--------------|--|
| 5           | -4.50            | 0.45            | -10.00        | -4.17          | -5.00          |               |              |                     |              |  |
| <u>S.No</u> | <u>Sample ID</u> | <u>Time</u>     | <u>Result</u> | <u>Scale</u>   | <u>OR °Arc</u> | <u>WLG.nm</u> | <u>Lg.mm</u> | <u>Conc.g/100ml</u> | <u>Temp.</u> |  |
| 1           | 05R53            | 11:31:06 AM     | -4.17         | SR             | -0.005         | 589           | 100.00       | 0.120               | 20.7         |  |
| 2           | 05R53            | 11:31:13 AM     | -5.00         | SR             | -0.006         | 589           | 100.00       | 0.120               | 20.6         |  |
| 3           | 05R53            | 11:31:20 AM     | -5.00         | SR             | -0.006         | 589           | 100.00       | 0.120               | 20.5         |  |
| 4           | 05R53            | 11:31:26 AM     | -4.17         | SR             | -0.005         | 589           | 100.00       | 0.120               | 20.4         |  |
| 5           | 05R53            | 11:31:33 AM     | -4.17         | SR             | -0.005         | 589           | 100.00       | 0.120               | 20.3         |  |

Figure S53. Specific Rotation of 5 in methanol.

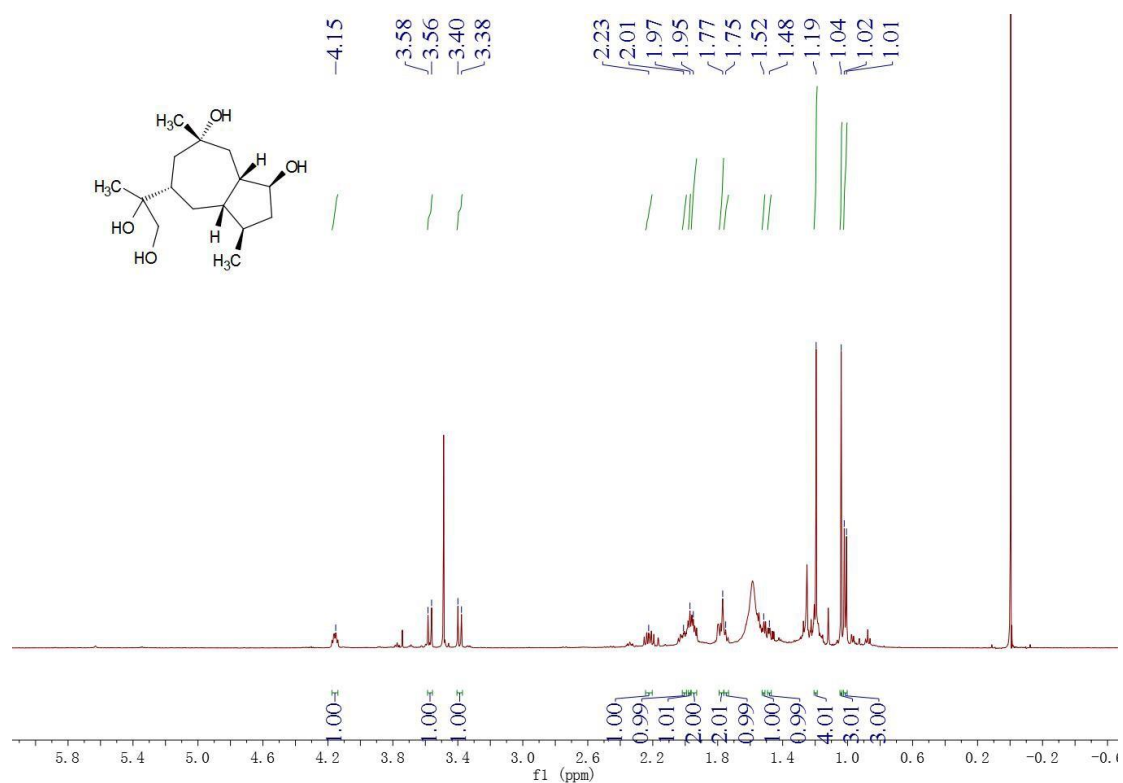

Figure S54. <sup>1</sup>H NMR spectrum of compound 6 in CDCl<sub>3</sub>.

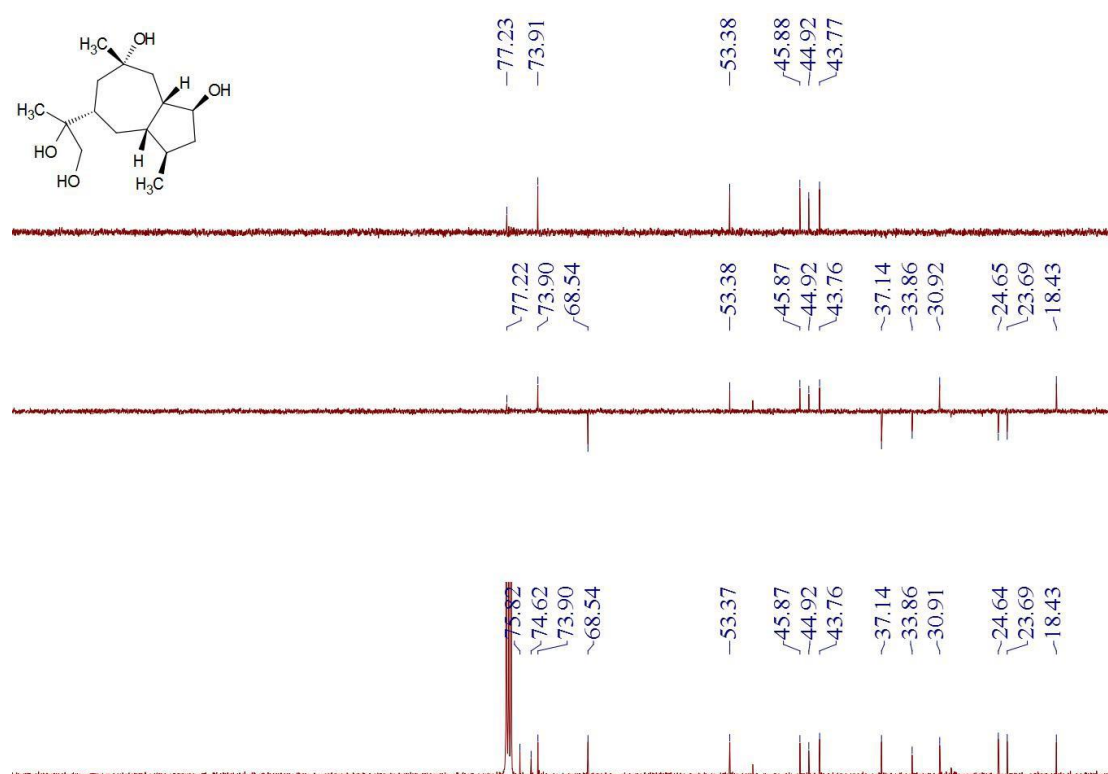

Figure S55. <sup>13</sup>C NMR and DEPT spectrum of compound 6 in CDCl<sub>3</sub>.

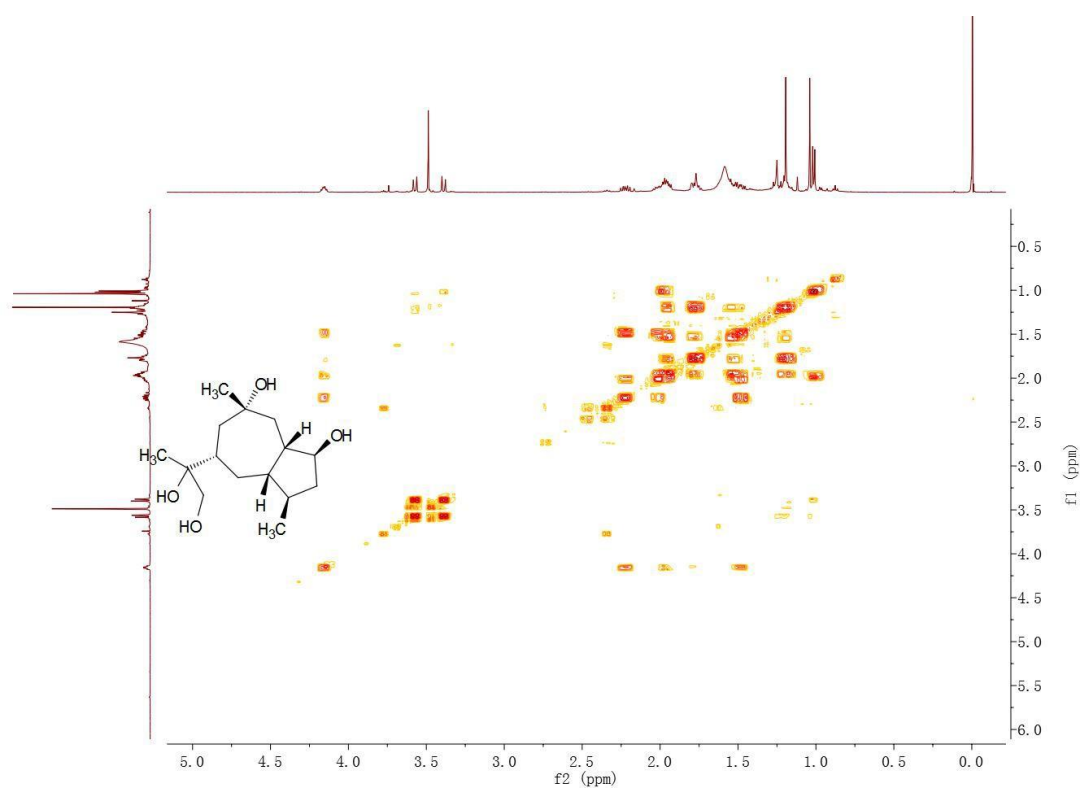

**Figure S56.**  $^1\text{H}$ - $^1\text{H}$  COSY spectrum of compound **6** in  $\text{CDCl}_3$ .

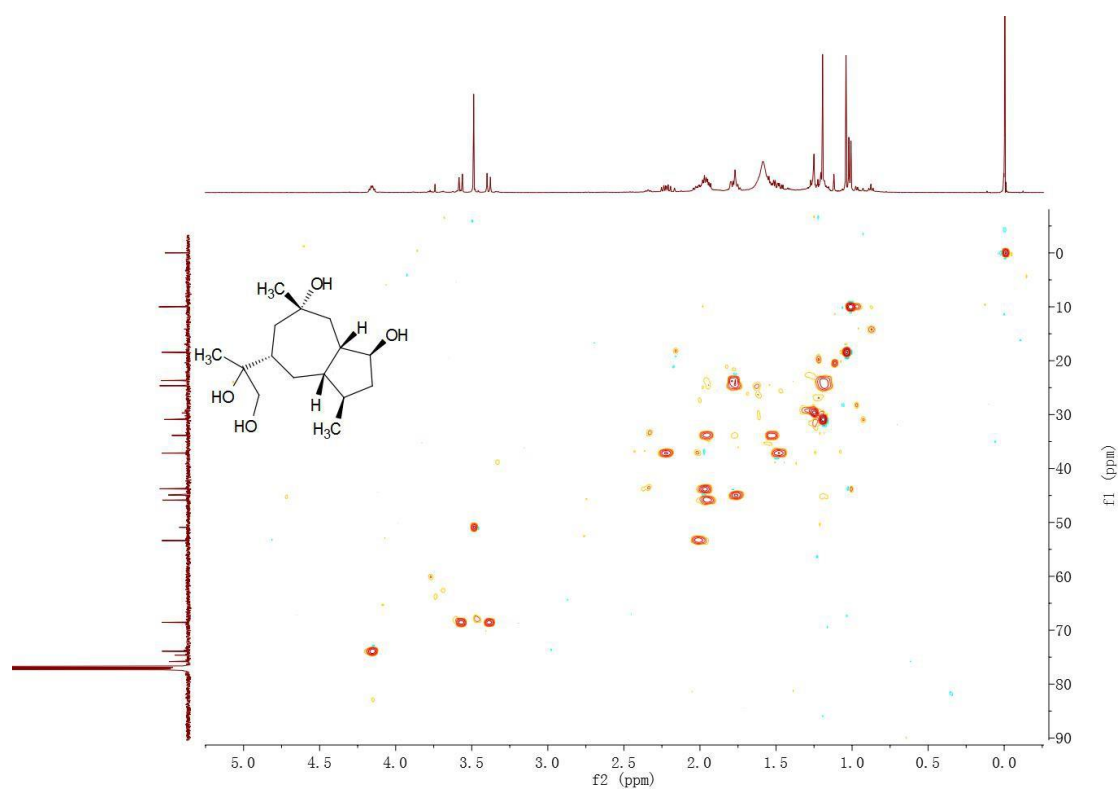

**Figure S57.** HSQC spectrum of compound **6** in  $\text{CDCl}_3$ .

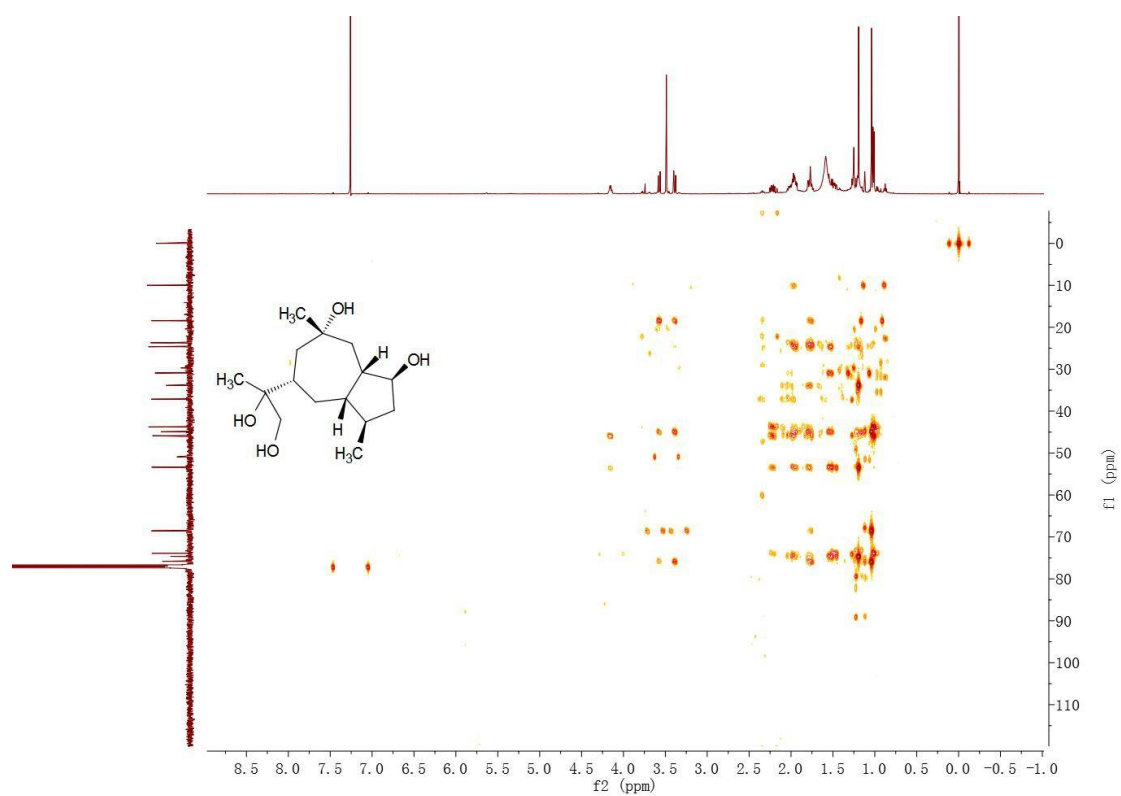

**Figure S58.** HMBC spectrum of compound **6** in CDCl<sub>3</sub>.

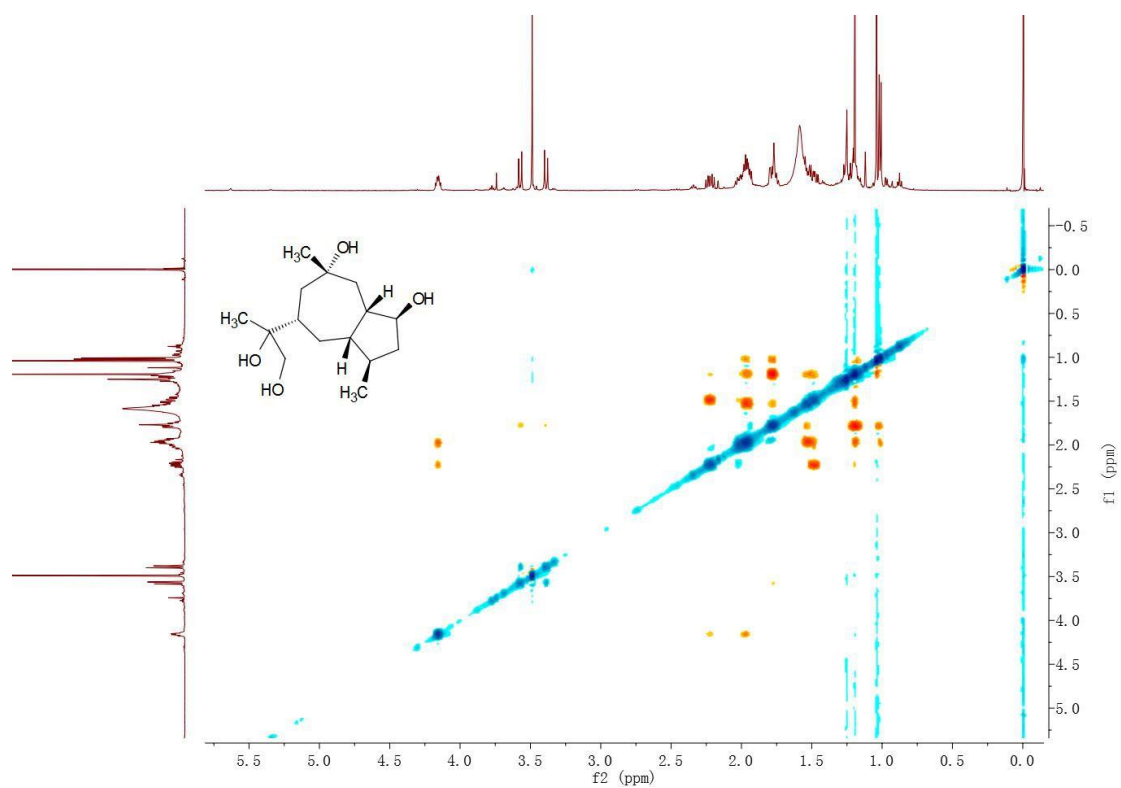

**Figure S59.** ROESY spectrum of compound **6** in CDCl<sub>3</sub>.

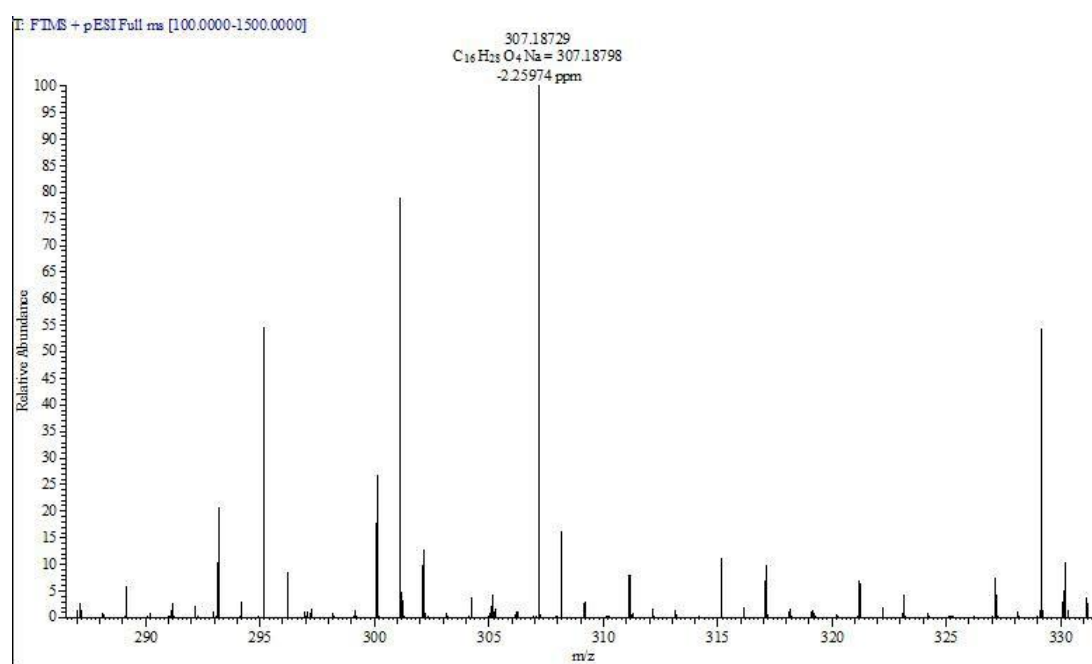

Figure S60. HRESIMS spectrum of compound 6.

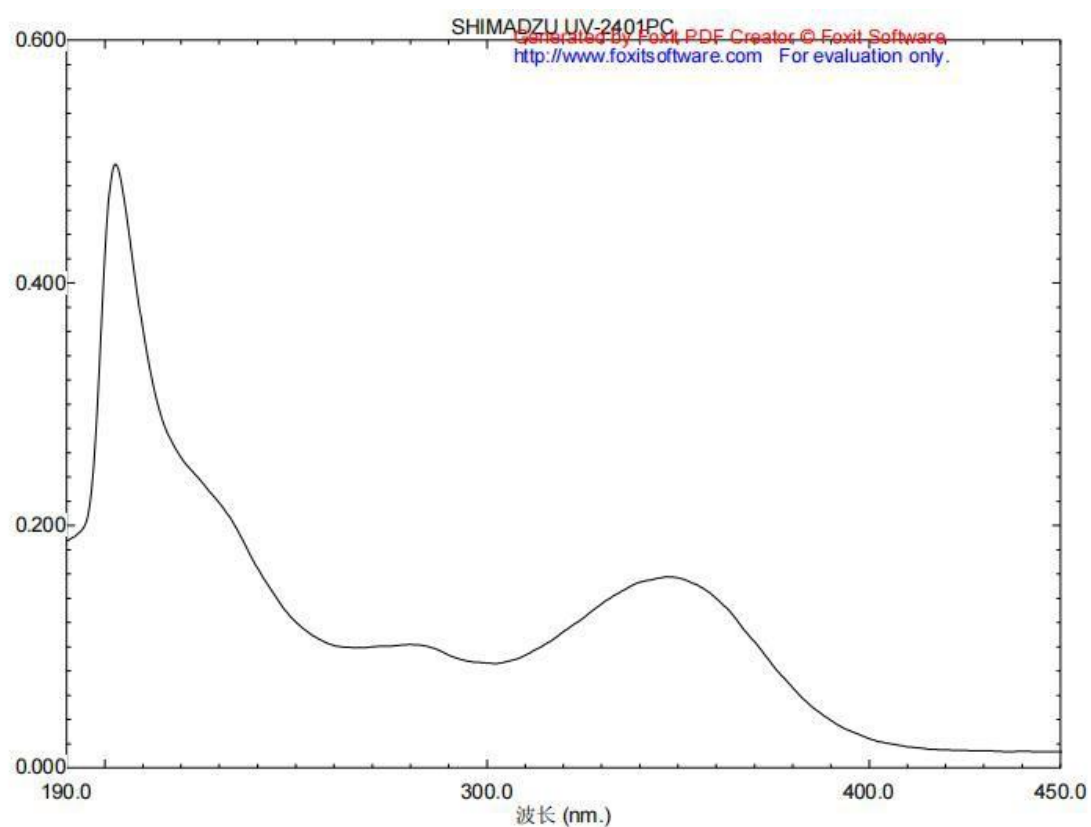

Figure S61. UV spectrum of 6 in methanol.



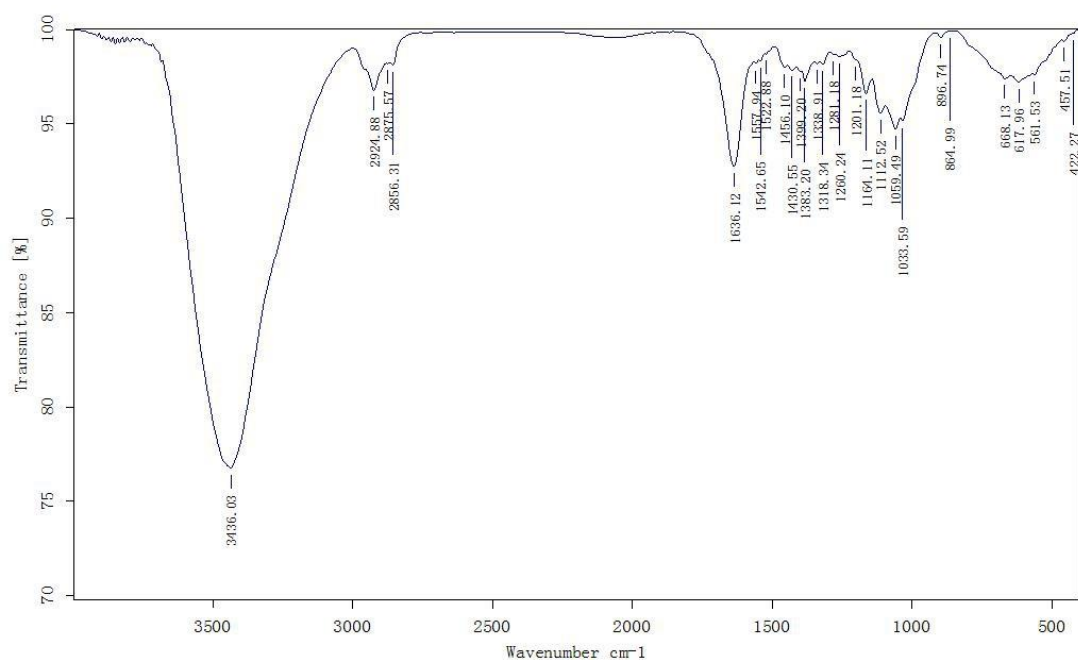

Figure S62. IR spectrum of **6** in methanol.

#### **Rudolph Research Analytical**

This sample was measured on an Autopol VI, Serial #91058  
Manufactured by Rudolph Research Analytical, Hackettstown, NJ, USA.

Measurement Date : Saturday, 18-JUN-2022

Set Temperature : OFF

Time Delay : Disabled

Delay between Measurement : Disabled

| <u>n</u>    | <u>Average</u>   | <u>Std.Dev.</u> | <u>% RSD</u>  | <u>Maximum</u> | <u>Minimum</u> |               |              |                     |              |  |
|-------------|------------------|-----------------|---------------|----------------|----------------|---------------|--------------|---------------------|--------------|--|
| 5           | -11.30           | 0.86            | -7.61         | -10.50         | -12.70         |               |              |                     |              |  |
| <u>S.No</u> | <u>Sample ID</u> | <u>Time</u>     | <u>Result</u> | <u>Scale</u>   | <u>OR °Arc</u> | <u>WLG.nm</u> | <u>Lg.mm</u> | <u>Conc.g/100ml</u> | <u>Temp.</u> |  |
| 1           | 05R55            | 04:44:29 PM     | -10.80        | SR             | -0.0108        | 589           | 100.00       | 0.100               | 23.8         |  |
| 2           | 05R55            | 04:44:37 PM     | -10.50        | SR             | -0.0105        | 589           | 100.00       | 0.100               | 23.8         |  |
| 3           | 05R55            | 04:44:45 PM     | -12.70        | SR             | -0.0127        | 589           | 100.00       | 0.100               | 23.8         |  |
| 4           | 05R55            | 04:44:53 PM     | -11.00        | SR             | -0.0110        | 589           | 100.00       | 0.100               | 23.8         |  |
| 5           | 05R55            | 04:45:01 PM     | -11.50        | SR             | -0.0115        | 589           | 100.00       | 0.100               | 23.8         |  |

Figure S63. Specific Rotation of **6** in methanol.

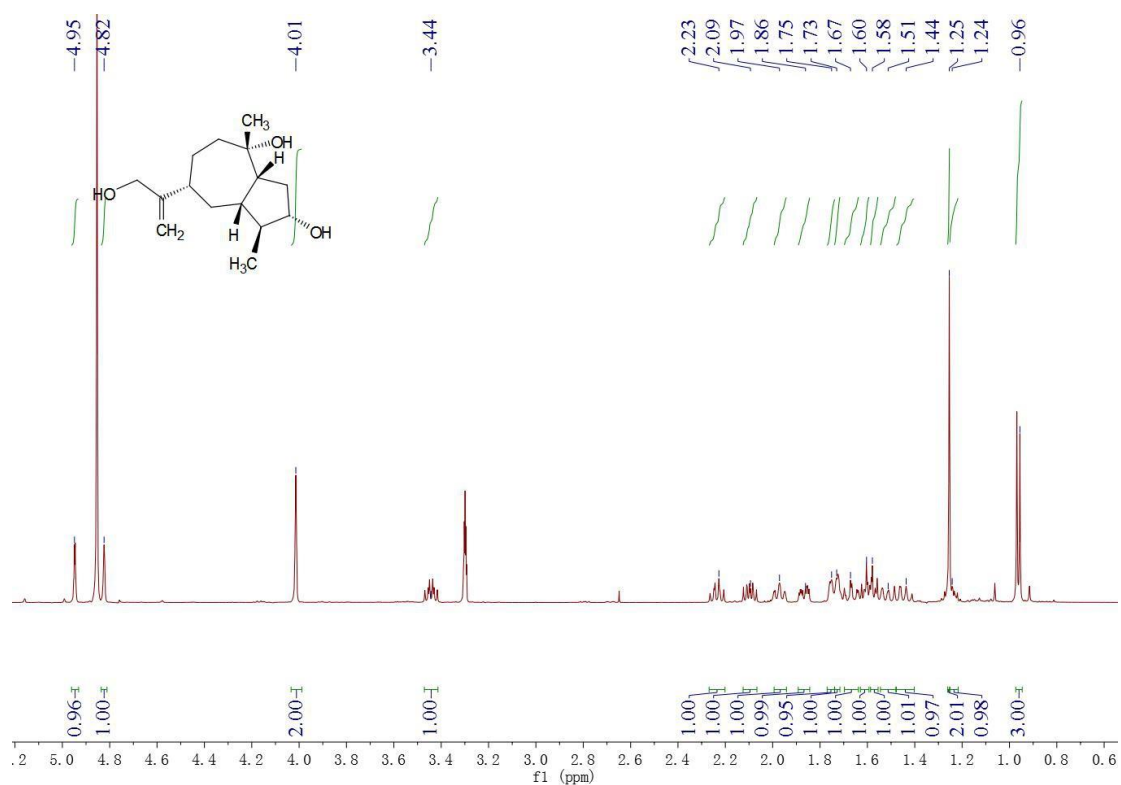

Figure S64. <sup>1</sup>H NMR spectrum of compound 7 in CD<sub>3</sub>OD.

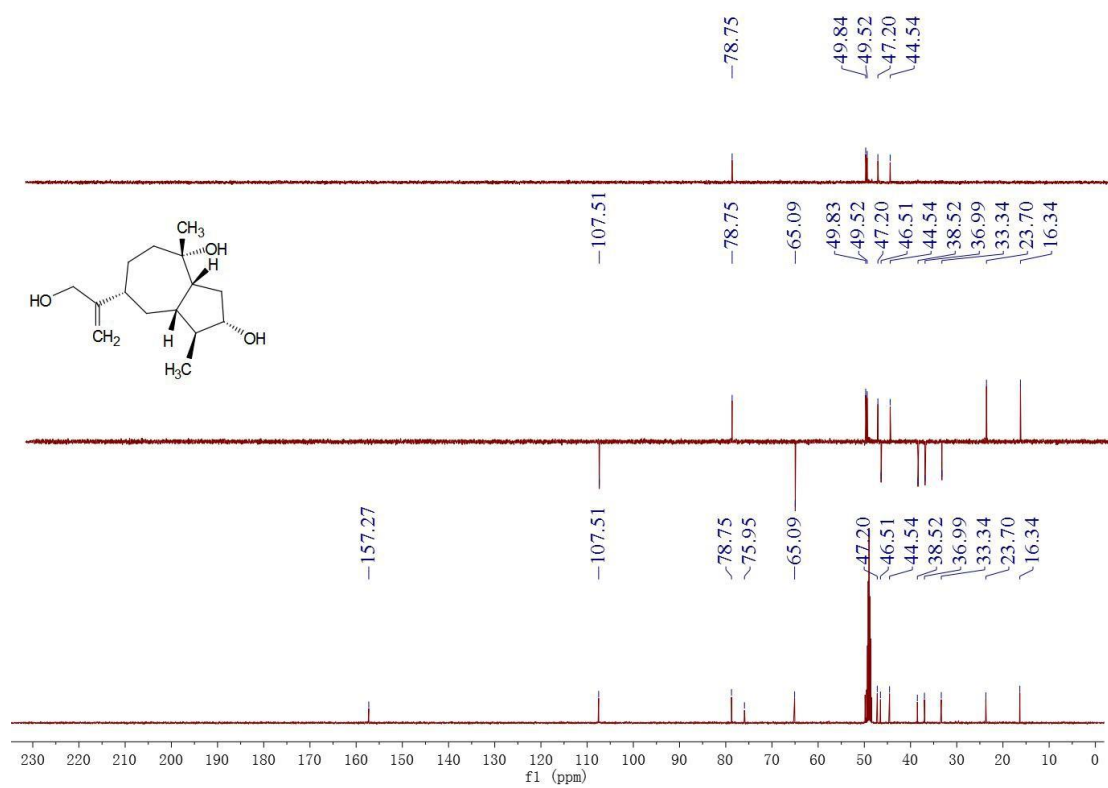

Figure S65. <sup>13</sup>C NMR and DEPT spectrum of compound 7 in CD<sub>3</sub>OD.

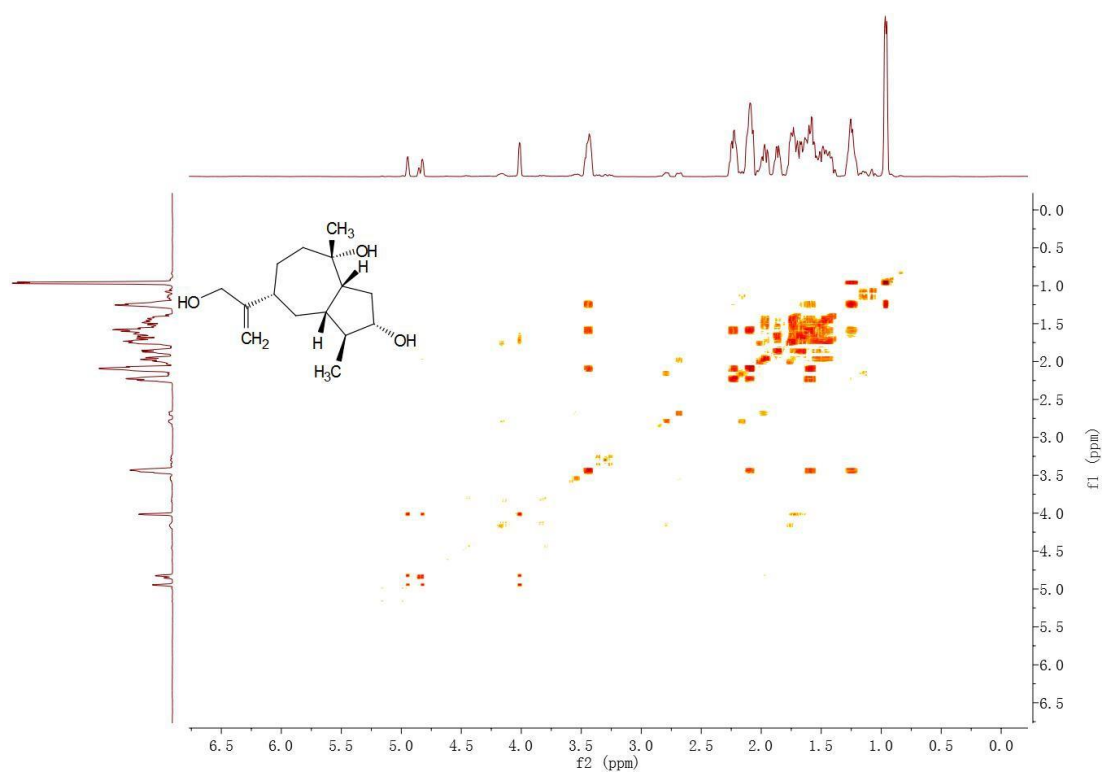

**Figure S66.**  $^1\text{H}$ - $^1\text{H}$  COSY spectrum of compound **7** in  $\text{CD}_3\text{OD}$ .

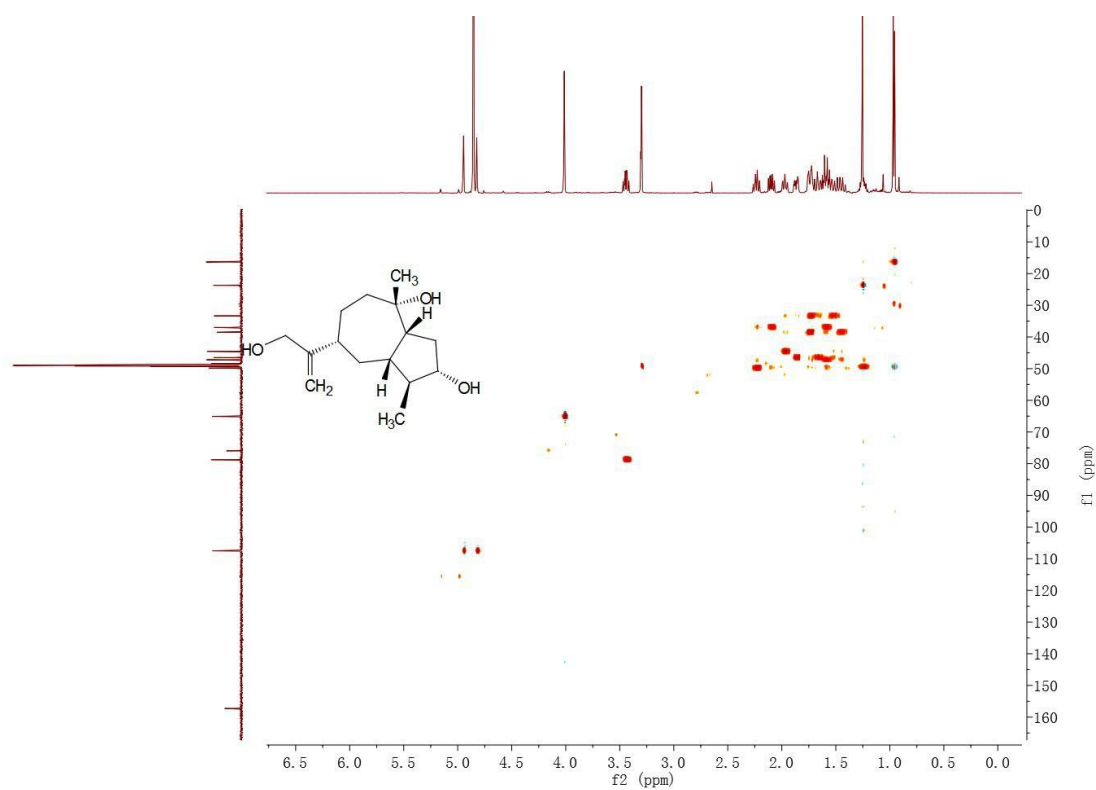

**Figure S67.** HSQC spectrum of compound **7** in  $\text{CD}_3\text{OD}$ .

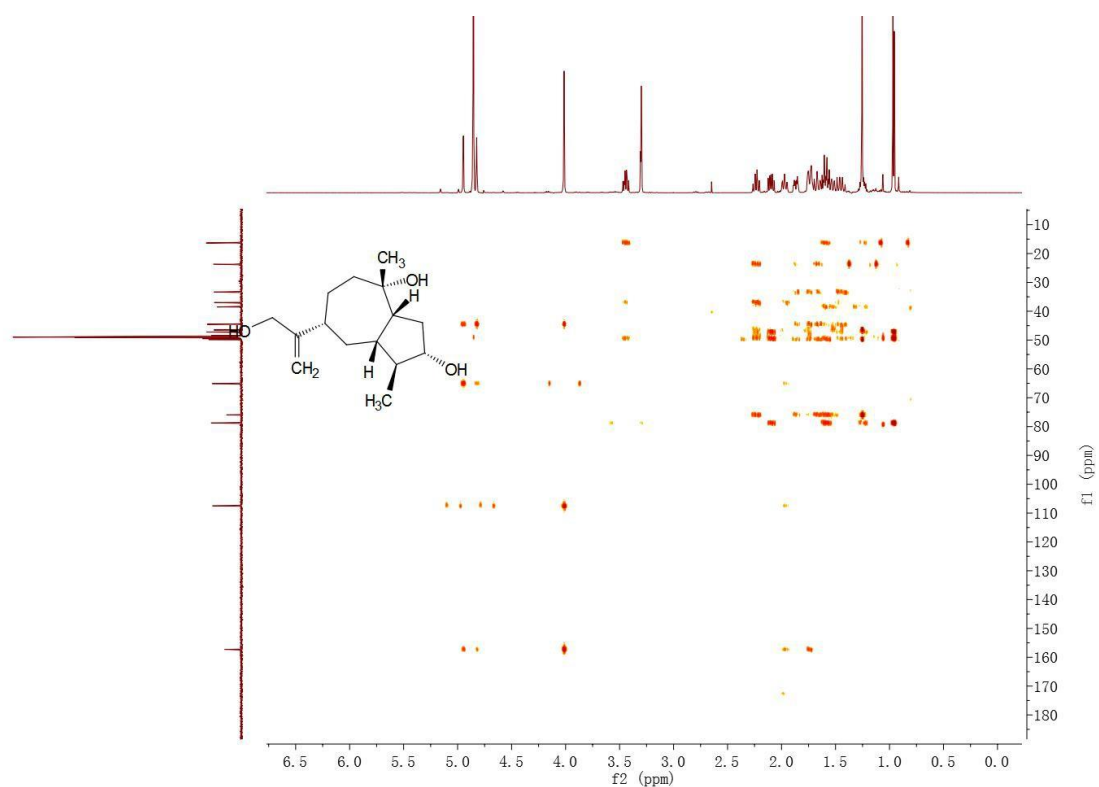

Figure S68. HMBC spectrum of compound 7 in CD<sub>3</sub>OD.

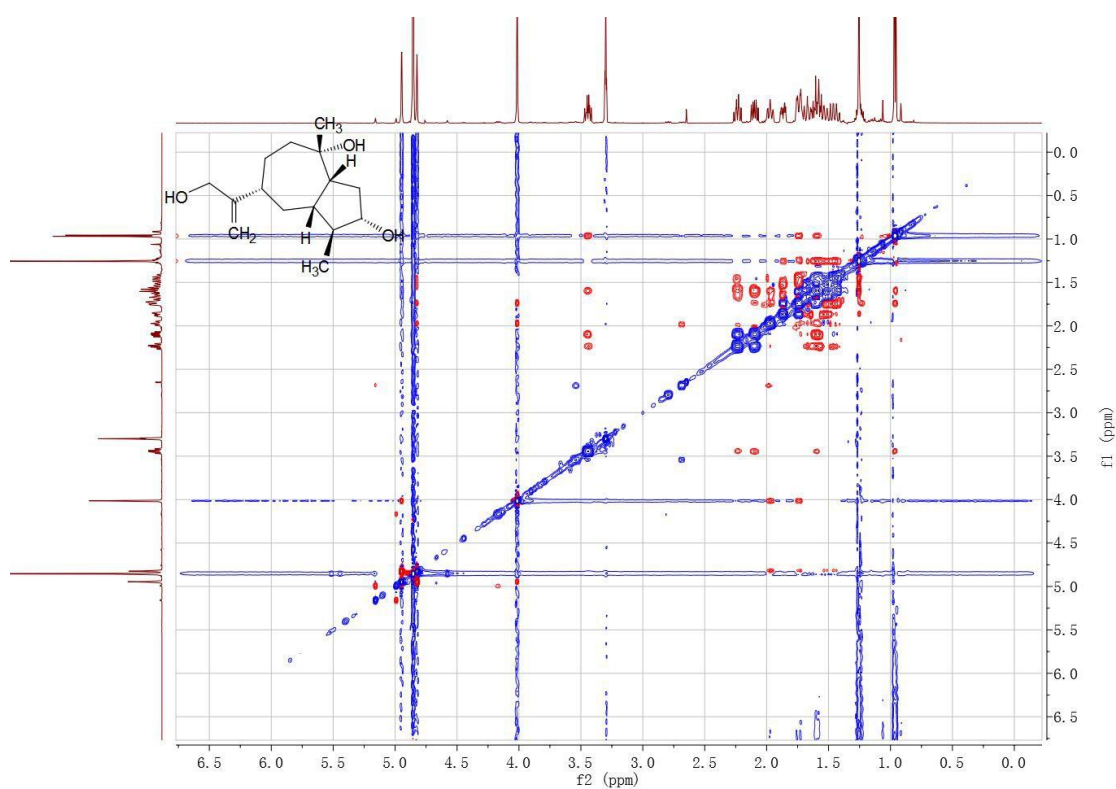

Figure S69. ROESY spectrum of compound 7 in CD<sub>3</sub>OD.

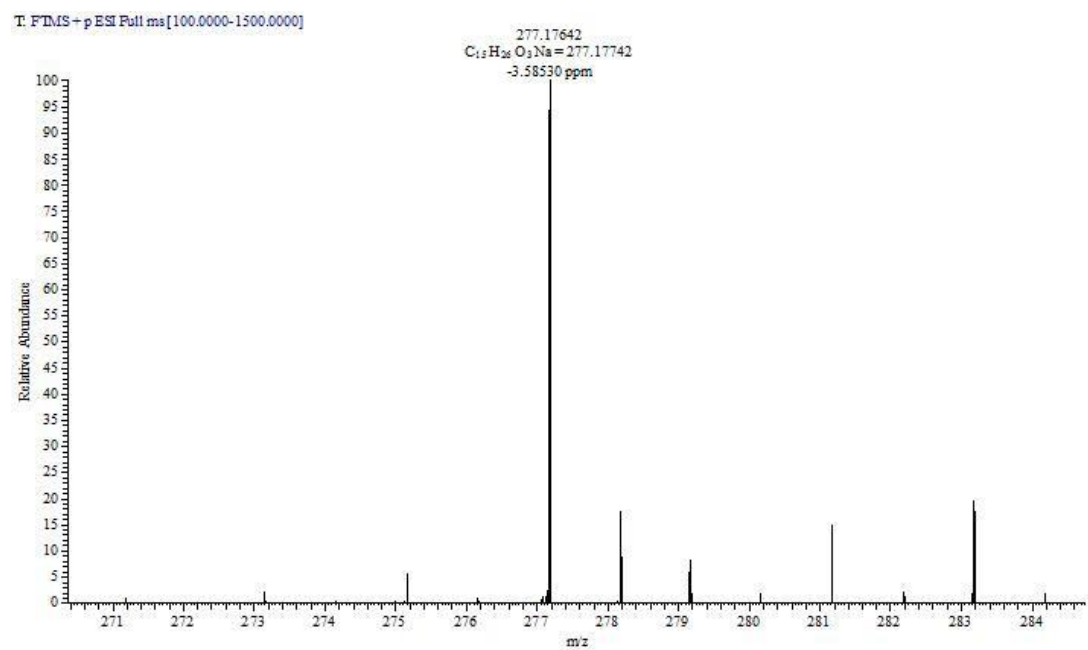

Figure S70. HRESIMS spectrum of compound 7.

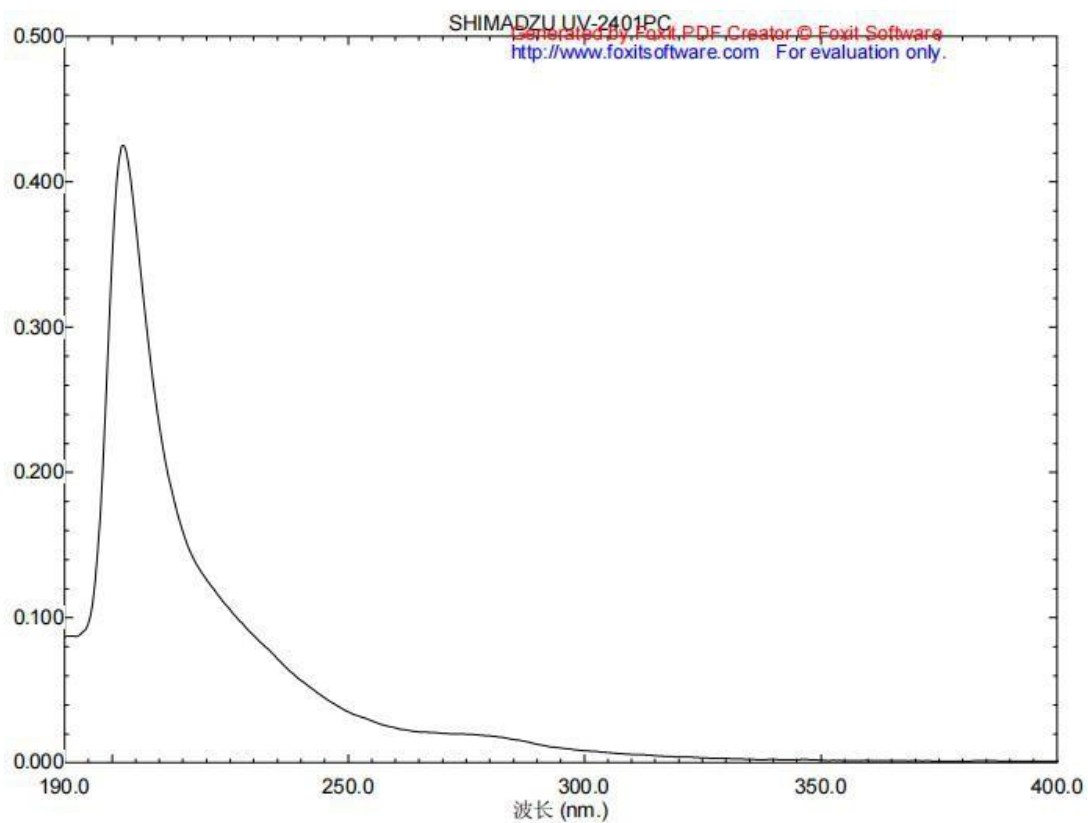

Figure S71. UV spectrum of 7 in methanol.

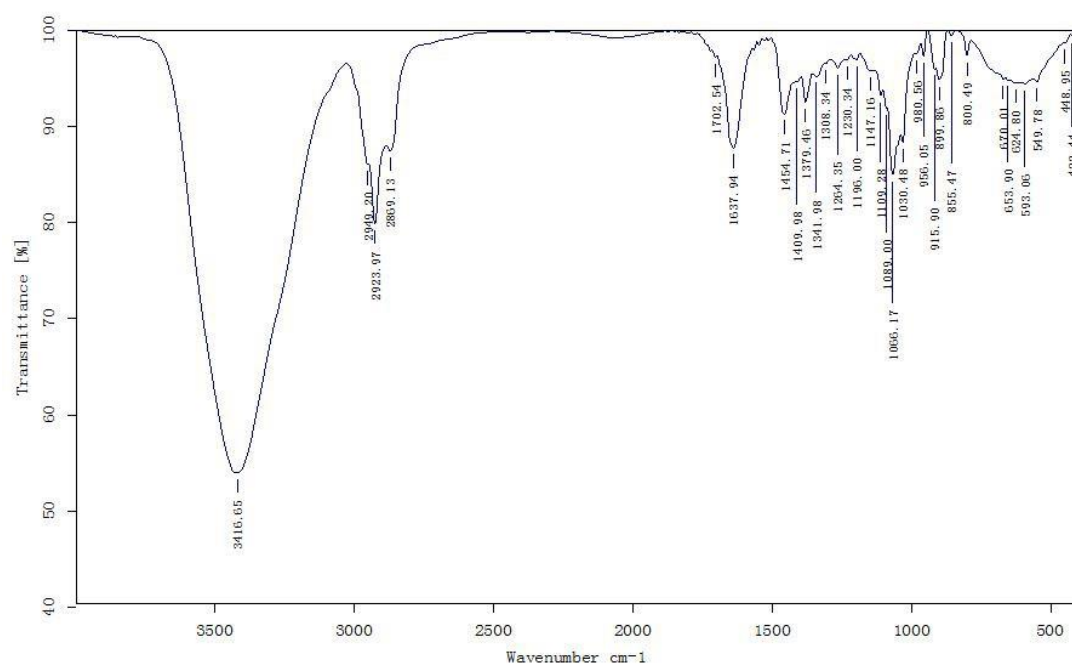

Figure S72. IR spectrum of 7 in methanol.

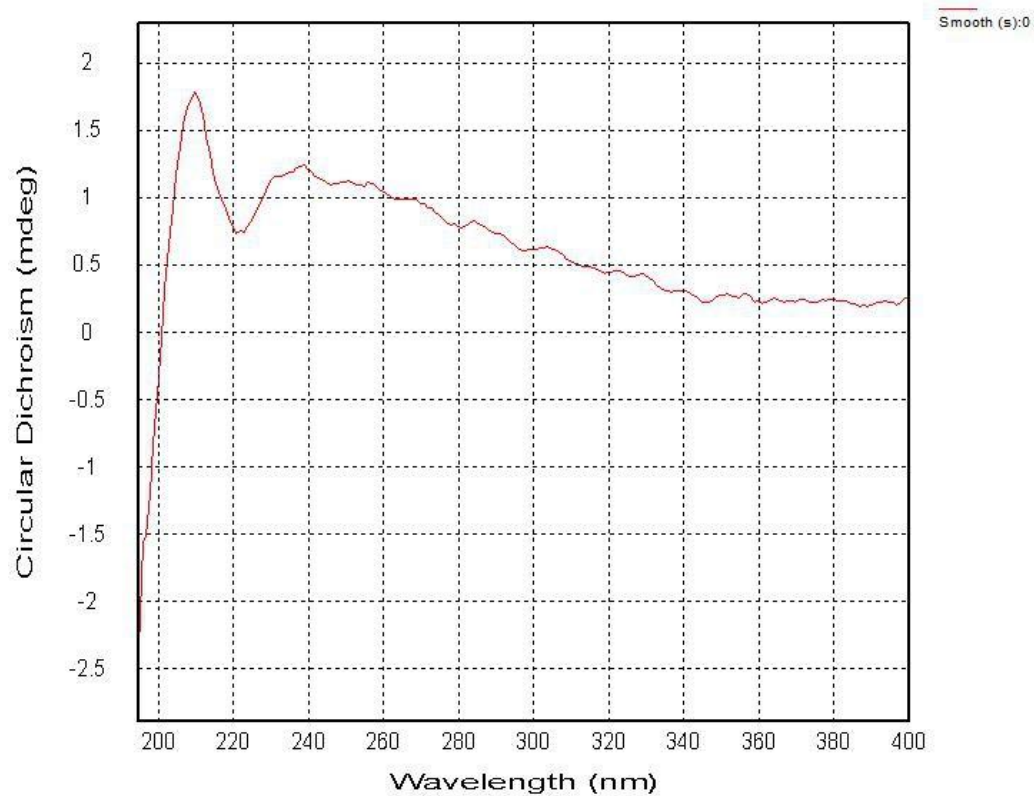

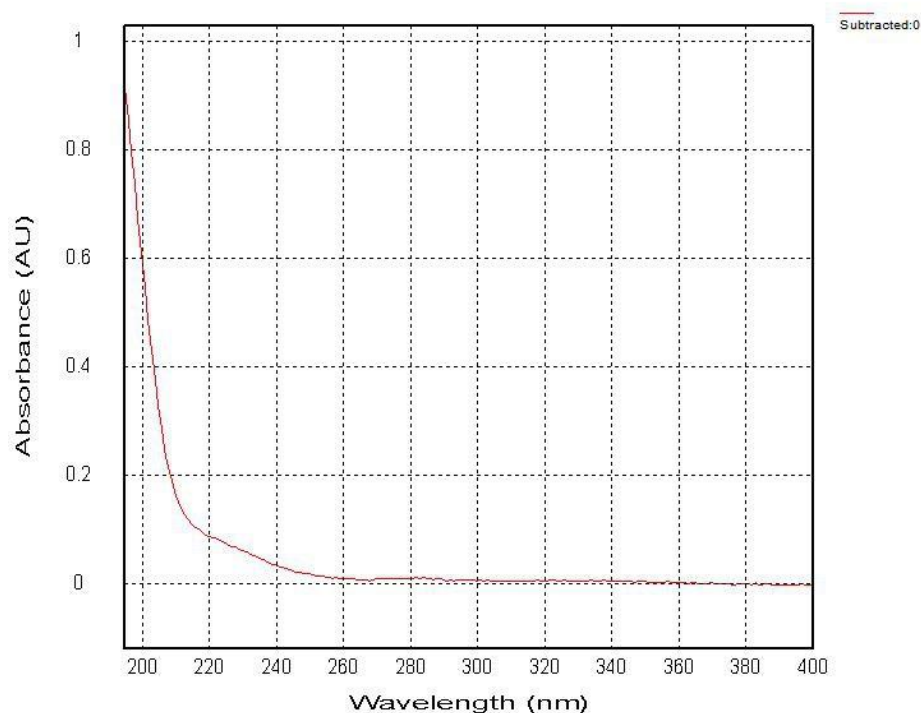

Figure S73. a CD spectrum of 7 in methanol.

#### Rudolph Research Analytical

This sample was measured on an Autopol VI, Serial #91058  
Manufactured by Rudolph Research Analytical, Hackettstown, NJ, USA.

Measurement Date : Saturday, 28-MAY-2022

Set Temperature : OFF

Time Delay : Disabled

Delay between Measurement : Disabled

| <u>n</u>    | <u>Average</u>   | <u>Std.Dev.</u> | <u>% RSD</u>  | <u>Maximum</u> | <u>Minimum</u> |               |              |                     |              |  |
|-------------|------------------|-----------------|---------------|----------------|----------------|---------------|--------------|---------------------|--------------|--|
| 5           | -15.25           | 0.21            | -1.37         | -15.05         | -15.50         |               |              |                     |              |  |
| <u>S.No</u> | <u>Sample ID</u> | <u>Time</u>     | <u>Result</u> | <u>Scale</u>   | <u>OR °Arc</u> | <u>WLG.nm</u> | <u>Lg.mm</u> | <u>Conc.g/100ml</u> | <u>Temp.</u> |  |
| 1           | 05R58            | 11:17:06 AM     | -15.45        | SR             | -0.0309        | 589           | 100.00       | 0.200               | 24.6         |  |
| 2           | 05R58            | 11:17:14 AM     | -15.05        | SR             | -0.0301        | 589           | 100.00       | 0.200               | 24.6         |  |
| 3           | 05R58            | 11:17:23 AM     | -15.50        | SR             | -0.0310        | 589           | 100.00       | 0.200               | 24.6         |  |
| 4           | 05R58            | 11:17:30 AM     | -15.10        | SR             | -0.0302        | 589           | 100.00       | 0.200               | 24.6         |  |
| 5           | 05R58            | 11:17:39 AM     | -15.15        | SR             | -0.0303        | 589           | 100.00       | 0.200               | 24.6         |  |

Figure S73. b Specific Rotation of 7 in methanol.

Three conformers for **1a**

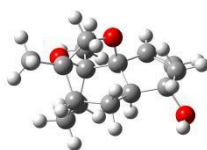

**1a\_1**

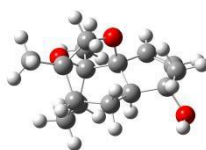

**1a\_2**

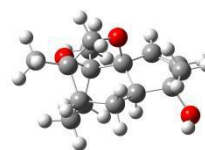

**1a\_3**

Figure S74. Optimized geometries of predominant conformers for compound 1a at the B3LYP/6-31G(d) level.



Three conformers for **1b**

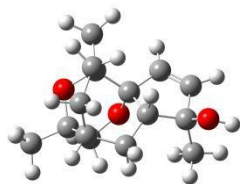

**1b\_1**

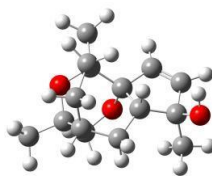

**1b\_2**

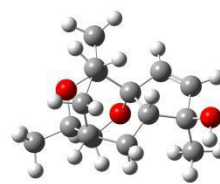

**1b\_3**

**Figure S75.** Optimized geometries of predominant conformers for compound **1b** at the B3LYP/6-31G(d) level.

**Table S1.** Boltzmann distribution of conformers **1a\_1–1a\_3**.

|           | Conformer   | E(Hartree)  | $\Delta G(\text{kcal/mol})$ | Proportion(%) |
|-----------|-------------|-------------|-----------------------------|---------------|
| <b>1a</b> | <b>1a_1</b> | -810.157367 | 0.336345038                 | 28.52         |
|           | <b>1a_2</b> | -810.157903 | 0                           | 50.34         |
|           | <b>1a_3</b> | -810.157084 | 0.513930198                 | 21.13         |

**Table S2.** Cartesian coordinates of conformers **1a\_1–1a\_2**.

| Atomic Type | <b>1a_1</b> |           |           | <b>1a_2</b> |           |           |
|-------------|-------------|-----------|-----------|-------------|-----------|-----------|
|             | X           | Y         | Z         | X           | Y         | Z         |
| C           | -0.329781   | 0.702491  | -0.39409  | -0.332725   | 0.693737  | -0.40107  |
| C           | -1.056445   | -0.279275 | 0.568202  | -1.056214   | -0.280924 | 0.571146  |
| C           | 1.022015    | 1.310801  | 0.189614  | 1.016941    | 1.315123  | 0.173949  |
| C           | -0.305577   | -1.594106 | 0.771802  | -0.299376   | -1.589374 | 0.791231  |
| H           | -1.108574   | 0.225346  | 1.536037  | -1.097055   | 0.236327  | 1.534684  |
| O           | -0.041135   | 0.081734  | -1.674432 | -0.042716   | 0.059556  | -1.674044 |
| C           | 1.175389    | 1.12046   | 1.710982  | 1.172872    | 1.143992  | 1.697354  |
| O           | 2.143794    | 0.59761   | -0.374959 | 2.140788    | 0.599051  | -0.38241  |
| C           | 1.215054    | -1.338618 | 0.877691  | 1.220168    | -1.325839 | 0.894306  |
| H           | -0.509422   | -2.304978 | -0.035015 | -0.500644   | -2.309895 | -0.007497 |
| H           | -0.64901    | -2.07635  | 1.695237  | -0.641863   | -2.062495 | 1.719776  |
| C           | 0.978216    | -0.927217 | -1.690121 | 0.980494    | -0.94594  | -1.678294 |
| C           | 1.556932    | -0.355673 | 2.024533  | 1.55802     | -0.327431 | 2.029085  |
| H           | 1.984909    | 1.779158  | 2.0455    | 1.981555    | 1.808506  | 2.022094  |
| H           | 0.278422    | 1.442418  | 2.249658  | 0.276393    | 1.471493  | 2.233786  |
| C           | 1.876343    | -0.816136 | -0.456807 | 1.87871     | -0.816706 | -0.446844 |
| H           | 1.685183    | -2.301077 | 1.113138  | 1.694761    | -2.283164 | 1.141417  |
| H           | 1.584808    | -0.73852  | -2.583619 | 1.585698    | -0.765108 | -2.574252 |
| H           | 0.525547    | -1.922193 | -1.794391 | 0.531294    | -1.943564 | -1.770787 |
| H           | 2.635367    | -0.407413 | 2.208993  | 2.636386    | -0.373801 | 2.215112  |
| H           | 1.071053    | -0.694012 | 2.94708   | 1.072482    | -0.655825 | 2.955414  |
| C           | 3.221744    | -1.496362 | -0.694793 | 3.226597    | -1.494508 | -0.677397 |
| H           | 3.850906    | -1.427951 | 0.199076  | 3.85586     | -1.412994 | 0.215294  |
| H           | 3.750307    | -1.018555 | -1.526107 | 3.752886    | -1.024599 | -1.51461  |
| H           | 3.080157    | -2.556168 | -0.933891 | 3.088949    | -2.557612 | -0.903752 |
| C           | -1.453912   | 1.676557  | -0.709045 | -1.462009   | 1.658625  | -0.729433 |
| H           | -1.286691   | 2.644419  | -1.16857  | -1.298165   | 2.620697  | -1.202009 |
| C           | -2.646579   | 1.132318  | -0.459861 | -2.653834   | 1.111308  | -0.480048 |
| H           | -3.610125   | 1.594557  | -0.662589 | -3.619942   | 1.562158  | -0.6938   |
| C           | -2.538499   | -0.271664 | 0.114074  | -2.544908   | -0.283116 | 0.112605  |
| C           | -2.923418   | -1.335825 | -0.920229 | -2.916349   | -1.361798 | -0.907215 |
| H           | -2.852638   | -2.337598 | -0.482556 | -2.861964   | -2.354623 | -0.447135 |
| H           | -3.95724    | -1.184463 | -1.256638 | -3.941702   | -1.207281 | -1.260214 |
| H           | -2.269382   | -1.280183 | -1.79447  | -2.237652   | -1.325697 | -1.762286 |
| O           | -3.338093   | -0.436342 | 1.301467  | -3.446849   | -0.485048 | 1.214329  |
| H           | -4.264487   | -0.515869 | 1.019928  | -3.30467    | 0.242225  | 1.842776  |
| C           | 1.223642    | 2.764167  | -0.230622 | 1.21215     | 2.763946  | -0.264454 |
| H           | 0.509887    | 3.425525  | 0.270895  | 0.495662    | 3.42853   | 0.228913  |
| H           | 2.235394    | 3.081613  | 0.041375  | 2.22522     | 3.089189  | 0.003327  |
| H           | 1.10836     | 2.876772  | -1.313663 | 1.096207    | 2.862491  | -1.348784 |



Table S3. Cartesian coordinates of conformers 1a\_3.

| Atomic Type | (+)-1c    |           |           |
|-------------|-----------|-----------|-----------|
|             | X         | Y         | Z         |
| C           | -0.329135 | 0.702433  | -0.389408 |
| C           | -1.05673  | -0.283601 | 0.568713  |
| C           | 1.022177  | 1.31006   | 0.196861  |
| C           | -0.303644 | -1.599116 | 0.76435   |
| H           | -1.108923 | 0.216746  | 1.538429  |
| O           | -0.039285 | 0.090623  | -1.673525 |
| C           | 1.175569  | 1.112619  | 1.717228  |
| O           | 2.1444    | 0.600355  | -0.371032 |
| C           | 1.217017  | -1.342594 | 0.871932  |
| H           | -0.506475 | -2.305874 | -0.04653  |
| H           | -0.642819 | -2.089527 | 1.685939  |
| C           | 0.979559  | -0.918585 | -1.693959 |
| C           | 1.557464  | -0.364949 | 2.023698  |
| H           | 1.984942  | 1.769908  | 2.054907  |
| H           | 0.278275  | 1.431447  | 2.257145  |
| C           | 1.877846  | -0.812831 | -0.460087 |
| H           | 1.688174  | -2.305706 | 1.102663  |
| H           | 1.585868  | -0.726031 | -2.586825 |
| H           | 0.526972  | -1.913169 | -1.80248  |
| H           | 2.635816  | -0.417322 | 2.208525  |
| H           | 1.071221  | -0.708038 | 2.944345  |
| C           | 3.223444  | -1.491454 | -0.701509 |
| H           | 3.852697  | -1.427126 | 0.192626  |
| H           | 3.751702  | -1.009372 | -1.53056  |
| H           | 3.082174  | -2.550136 | -0.945762 |
| C           | -1.454276 | 1.676791  | -0.699234 |
| H           | -1.288814 | 2.64229   | -1.164013 |
| C           | -2.647856 | 1.138482  | -0.442463 |
| H           | -3.611708 | 1.601684  | -0.637071 |
| C           | -2.546155 | -0.267588 | 0.113649  |
| C           | -2.922831 | -1.315662 | -0.942344 |
| H           | -2.861958 | -2.328846 | -0.524106 |
| H           | -3.950972 | -1.152068 | -1.283002 |
| H           | -2.250197 | -1.257373 | -1.80202  |
| O           | -3.444761 | -0.368686 | 1.233453  |
| H           | -3.448652 | -1.297572 | 1.517243  |
| C           | 1.221589  | 2.765623  | -0.216739 |
| H           | 0.506014  | 3.423333  | 0.287053  |
| H           | 2.232469  | 3.083922  | 0.057613  |
| H           | 1.107138  | 2.882726  | -1.299415 |

Table S4. Boltzmann distribution of conformers 1b\_1-1b\_3.

| Conformer |      | E(Hartree)  | $\Delta G(\text{kcal/mol})$ | Proportion(%) |
|-----------|------|-------------|-----------------------------|---------------|
| 1b        | 1b_1 | -810.157367 | 0.336345038                 | 28.52         |
|           | 1b_2 | -810.157903 | 0                           | 50.34         |
|           | 1b_3 | -810.157084 | 0.513930198                 | 21.13         |

Table S5. Cartesian coordinates of conformers 1b\_1-1b\_2.

| Atomic Type | 1b_1      |           |           | 1b_2      |           |           |
|-------------|-----------|-----------|-----------|-----------|-----------|-----------|
|             | X         | Y         | Z         | X         | Y         | Z         |
| C           | 0.329781  | 0.702491  | -0.39409  | 0.332725  | 0.693737  | -0.40107  |
| C           | 1.056445  | -0.279275 | 0.568202  | 1.056214  | -0.280924 | 0.571146  |
| C           | -1.022015 | 1.310801  | 0.189614  | -1.016941 | 1.315123  | 0.173949  |
| C           | 0.305577  | -1.594106 | 0.771802  | 0.299376  | -1.589374 | 0.791231  |
| H           | 1.108574  | 0.225346  | 1.536037  | 1.097055  | 0.236327  | 1.534684  |
| O           | 0.041135  | 0.081734  | -1.674432 | 0.042716  | 0.059556  | -1.674044 |
| C           | -1.175389 | 1.12046   | 1.710982  | -1.172872 | 1.143992  | 1.697354  |
| O           | -2.143794 | 0.59761   | -0.374959 | -2.140788 | 0.599051  | -0.38241  |
| C           | -1.215054 | -1.338618 | 0.877691  | -1.220168 | -1.325839 | 0.894306  |
| H           | 0.509422  | -2.304978 | -0.035015 | 0.500644  | -2.309895 | -0.007497 |
| H           | 0.64901   | -2.07635  | 1.695237  | 0.641863  | -2.062495 | 1.719776  |
| C           | -0.978216 | -0.927217 | -1.690121 | -0.980494 | -0.94594  | -1.678294 |
| C           | -1.556932 | -0.355673 | 2.024533  | -1.55802  | -0.327431 | 2.029085  |

|   |           |           |           |           |           |           |
|---|-----------|-----------|-----------|-----------|-----------|-----------|
| H | -1.984909 | 1.779158  | 2.0455    | -1.981555 | 1.808506  | 2.022094  |
| H | -0.278422 | 1.442418  | 2.249658  | -0.276393 | 1.471493  | 2.233786  |
| C | -1.876343 | -0.816136 | -0.456807 | -1.87871  | -0.816706 | -0.446844 |
| H | -1.685183 | -2.301077 | 1.113138  | -1.694761 | -2.283164 | 1.141417  |
| H | -1.584808 | -0.73852  | -2.583619 | -1.585698 | -0.765108 | -2.574252 |
| H | -0.525547 | -1.922193 | -1.79439  | -0.531294 | -1.943564 | -1.770787 |
| H | -2.635367 | -0.407413 | 2.208993  | -2.636386 | -0.373801 | 2.215112  |
| H | -1.071053 | -0.694012 | 2.94708   | -1.072482 | -0.655825 | 2.955414  |
| C | -3.221744 | -1.496362 | -0.694793 | -3.226597 | -1.494508 | -0.677397 |
| H | -3.850906 | -1.427951 | 0.199076  | -3.85586  | -1.412994 | 0.215294  |
| H | -3.750307 | -1.018555 | -1.526107 | -3.752886 | -1.024599 | -1.51461  |
| H | -3.080157 | -2.556168 | -0.933891 | -3.088949 | -2.557612 | -0.903752 |
| C | 1.453912  | 1.676557  | -0.709045 | 1.462009  | 1.658625  | -0.729433 |
| H | 1.286691  | 2.644419  | -1.16857  | 1.298165  | 2.620697  | -1.202009 |
| C | 2.646579  | 1.132318  | -0.459861 | 2.653834  | 1.111308  | -0.480048 |
| H | 3.610125  | 1.594557  | -0.662589 | 3.619942  | 1.562158  | -0.6938   |
| C | 2.538499  | -0.271664 | 0.114074  | 2.544908  | -0.283116 | 0.112605  |
| C | 2.923418  | -1.335825 | -0.920229 | 2.916349  | -1.361798 | -0.907215 |
| H | 2.852638  | -2.337598 | -0.482556 | 2.861964  | -2.354623 | -0.447135 |
| H | 3.95724   | -1.184463 | -1.256638 | 3.941702  | -1.207281 | -1.260214 |
| H | 2.269382  | -1.280183 | -1.79447  | 2.237652  | -1.325697 | -1.762286 |
| O | 3.338093  | -0.436342 | 1.301467  | 3.446849  | -0.485048 | 1.214329  |
| H | 4.264487  | -0.515869 | 1.019928  | 3.30467   | 0.242225  | 1.842776  |
| C | -1.223642 | 2.764167  | -0.230622 | -1.21215  | 2.763946  | -0.264454 |
| H | -0.509887 | 3.425525  | 0.270895  | -0.495662 | 3.428529  | 0.228913  |
| H | -2.235394 | 3.081613  | 0.041375  | -2.222522 | 3.089189  | 0.003327  |
| H | -1.10836  | 2.876772  | -1.313663 | -1.096207 | 2.862491  | -1.348784 |

**Table S6.** Cartesian coordinates of conformers **1b\_3**.

| Atomic Type | 1b_3     |          |          |
|-------------|----------|----------|----------|
|             | X        | Y        | Z        |
| C           | 0.329135 | 0.702433 | -0.38941 |
| C           | 1.05673  | -0.2836  | 0.568713 |
| C           | -1.02218 | 1.31006  | 0.196861 |
| C           | 0.303644 | -1.59912 | 0.76435  |
| H           | 1.108923 | 0.216746 | 1.538429 |
| O           | 0.039285 | 0.090623 | -1.67353 |
| C           | -1.17557 | 1.112619 | 1.717228 |
| O           | -2.1444  | 0.600355 | -0.37103 |
| C           | -1.21702 | -1.34259 | 0.871932 |
| H           | 0.506475 | -2.30587 | -0.04653 |
| H           | 0.642819 | -2.08953 | 1.685939 |
| C           | -0.97956 | -0.91859 | -1.69396 |
| C           | -1.55746 | -0.36495 | 2.023698 |
| H           | -1.98494 | 1.769908 | 2.054907 |
| H           | -0.27828 | 1.431447 | 2.257145 |
| C           | -1.87785 | -0.81283 | -0.46009 |
| H           | -1.68817 | -2.30571 | 1.102663 |
| H           | -1.58587 | -0.72603 | -2.58683 |
| H           | -0.52697 | -1.91317 | -1.80248 |
| H           | -2.63582 | -0.41732 | 2.208525 |
| H           | -1.07122 | -0.70804 | 2.944345 |
| C           | -3.22344 | -1.49145 | -0.70151 |
| H           | -3.8527  | -1.42713 | 0.192626 |
| H           | -3.7517  | -1.00937 | -1.53056 |
| H           | -3.08217 | -2.55014 | -0.94576 |
| C           | 1.454275 | 1.676791 | -0.69923 |
| H           | 1.288814 | 2.64229  | -1.16401 |
| C           | 2.647856 | 1.138482 | -0.44246 |
| H           | 3.611708 | 1.601684 | -0.63707 |
| C           | 2.546155 | -0.26759 | 0.113649 |
| C           | 2.922831 | -1.31566 | -0.94234 |
| H           | 2.861958 | -2.32885 | -0.52411 |
| H           | 3.950972 | -1.15207 | -1.283   |
| H           | 2.250197 | -1.25737 | -1.80202 |
| O           | 3.444761 | -0.36869 | 1.233453 |
| H           | 3.448652 | -1.29757 | 1.517243 |
| C           | -1.22159 | 2.765623 | -0.21674 |
| H           | -0.50601 | 3.423333 | 0.287053 |
| H           | -2.23247 | 3.083922 | 0.057613 |

|   |          |          |          |
|---|----------|----------|----------|
| H | -1.10714 | 2.882726 | -1.29942 |
|---|----------|----------|----------|

**Table S7.** Gibbs free energies<sup>a</sup> and equilibrium populations<sup>b</sup> of low-energy conformers of compound 2.

| Conformers | $\Delta G(\text{a.u.})$ | P(%) / 100 | G(a.u.)     |
|------------|-------------------------|------------|-------------|
| 2_a        | 0.0058                  | 0.12       | -813.72172  |
| 2_b        | 0.0                     | 55.84      | -813.727517 |
| 2_c        | 0.01318                 | 0.0        | -813.714337 |
| 2_d        | 0.0014                  | 12.71      | -813.726119 |
| 2-e        | 0.00714                 | 0.03       | -813.720374 |
| 2_f        | 0.0037                  | 1.1        | -813.723813 |
| 2_g        | 0.00058                 | 30.2       | -813.726936 |

<sup>a</sup>wB97M-V/def2-TZVP, in a.u.m<sup>b</sup>From  $\Delta G$  values at 298.15K.

**Table S8.** Cartesian coordinates for the low-energy reoptimized random research conformers of compound 2 at B3LYP-D3(BJ)/6-31G\* level of theory in methanol.

| 2_a           |               |             | Standard Orientation (A.U.) |           |           |
|---------------|---------------|-------------|-----------------------------|-----------|-----------|
| Center number | Atomic number | Atomic Type | X                           | Y         | Z         |
| 0             | 6             | 0           | 0.783819                    | -0.605193 | 3.423168  |
| 1             | 6             | 0           | -0.877688                   | -2.145008 | 1.598982  |
| 2             | 6             | 0           | -1.715782                   | -0.478772 | -0.630255 |
| 3             | 6             | 0           | 0.274598                    | 0.163238  | -2.642882 |
| 4             | 6             | 0           | 2.866612                    | 1.249449  | -1.818345 |
| 5             | 6             | 0           | 4.594293                    | -0.134303 | 0.096514  |
| 6             | 6             | 0           | 3.622086                    | -0.478661 | 2.850835  |
| 7             | 6             | 0           | -0.651123                   | 2.345135  | -4.379528 |
| 8             | 6             | 0           | -0.002107                   | 4.732711  | -2.832737 |
| 9             | 6             | 0           | 2.472811                    | 4.119149  | -1.405103 |
| 10            | 8             | 0           | 6.916375                    | 1.268129  | 0.198901  |
| 11            | 6             | 0           | 5.355782                    | -2.70157  | -1.012161 |
| 12            | 8             | 0           | 2.37878                     | 4.694623  | 1.227486  |
| 13            | 6             | 0           | -3.38489                    | 2.236634  | -5.296052 |
| 14            | 6             | 0           | -3.167898                   | -3.3918   | 2.954516  |
| 15            | 6             | 0           | -4.755459                   | -1.590374 | 4.584725  |
| 16            | 8             | 0           | -5.754795                   | 0.525914  | 3.286709  |
| 17            | 1             | 0           | 4.001666                    | 1.178141  | -3.567079 |
| 18            | 1             | 0           | 0.238348                    | -3.739629 | 0.835322  |
| 19            | 1             | 0           | 0.605445                    | -1.558235 | -3.776992 |
| 20            | 6             | 0           | -2.352007                   | -5.67545  | 4.546806  |
| 21            | 1             | 0           | -4.434697                   | -4.121634 | 1.449225  |
| 22            | 1             | 0           | 0.030383                    | 1.333145  | 3.501663  |
| 23            | 1             | 0           | 0.615736                    | -1.368878 | 5.358717  |
| 24            | 1             | 0           | -3.275948                   | -1.446935 | -1.632296 |
| 25            | 1             | 0           | -2.543864                   | 1.255841  | 0.164396  |
| 26            | 1             | 0           | 4.387057                    | 1.098291  | 3.973175  |
| 27            | 1             | 0           | 4.546104                    | -2.199594 | 3.592946  |
| 28            | 1             | 0           | 0.580969                    | 2.331515  | -6.069204 |
| 29            | 1             | 0           | 0.145626                    | 6.435773  | -4.02871  |
| 30            | 1             | 0           | -1.499321                   | 5.082697  | -1.42059  |
| 31            | 1             | 0           | 4.08501                     | 5.152567  | -2.243022 |
| 32            | 1             | 0           | 6.523088                    | 2.846106  | 1.05767   |
| 33            | 1             | 0           | 3.738574                    | -4.011252 | -1.094683 |
| 34            | 1             | 0           | 6.126626                    | -2.469842 | -2.936685 |
| 35            | 1             | 0           | 6.83905                     | -3.551731 | 0.180812  |
| 36            | 1             | 0           | 2.001495                    | 6.480996  | 1.421624  |
| 37            | 1             | 0           | -3.774232                   | 0.451724  | -6.309571 |
| 38            | 1             | 0           | -4.739286                   | 2.385987  | -3.716097 |
| 39            | 1             | 0           | -3.783488                   | 3.810033  | -6.611066 |
| 40            | 1             | 0           | -3.597463                   | -0.801852 | 6.127308  |
| 41            | 1             | 0           | -6.294995                   | -2.696508 | 5.49072   |
| 42            | 1             | 0           | -6.652676                   | -0.077558 | 1.802927  |
| 43            | 1             | 0           | -3.994586                   | -6.613071 | 5.432775  |
| 44            | 1             | 0           | -1.368029                   | -7.089827 | 3.369533  |
| 45            | 1             | 0           | -1.048356                   | -5.11572  | 6.079714  |
| 2_b           |               |             | Standard Orientation (A.U.) |           |           |
| Center number | Atomic number | Atomic Type | X                           | Y         | Z         |

|    |   |   |           |           |           |
|----|---|---|-----------|-----------|-----------|
| 0  | 6 | 0 | 0.9965    | -3.384837 | 1.400963  |
| 1  | 6 | 0 | -1.677936 | -2.591786 | 0.536248  |
| 2  | 6 | 0 | -1.755781 | 0.02062   | -0.735075 |
| 3  | 6 | 0 | 0.245041  | 0.485187  | -2.796167 |
| 4  | 6 | 0 | 2.809922  | 1.506477  | -1.806855 |
| 5  | 6 | 0 | 4.315851  | 0.058701  | 0.25671   |
| 6  | 6 | 0 | 2.716118  | -1.232141 | 2.310733  |
| 7  | 6 | 0 | -0.493224 | 2.700776  | -4.578764 |
| 8  | 6 | 0 | 0.079092  | 5.068963  | -2.971998 |
| 9  | 6 | 0 | 2.26297   | 4.335111  | -1.184736 |
| 10 | 8 | 0 | 5.832791  | 1.842086  | 1.681973  |
| 11 | 6 | 0 | 6.118548  | -1.833585 | -0.998634 |
| 12 | 8 | 0 | 1.53037   | 4.75027   | 1.356569  |
| 13 | 6 | 0 | -3.129647 | 2.656782  | -5.75071  |
| 14 | 6 | 0 | -3.696259 | -2.775055 | 2.659707  |
| 15 | 6 | 0 | -3.022527 | -1.28206  | 5.061179  |
| 16 | 8 | 0 | -4.991551 | -1.296464 | 6.877245  |
| 17 | 1 | 0 | 4.05903   | 1.566935  | -3.483749 |
| 18 | 1 | 0 | -2.273082 | -3.977599 | -0.912    |
| 19 | 1 | 0 | 0.503731  | -1.267644 | -3.905937 |
| 20 | 6 | 0 | -4.362533 | -5.515874 | 3.321824  |
| 21 | 1 | 0 | -5.431842 | -1.882343 | 1.887323  |
| 22 | 1 | 0 | 0.830256  | -4.796328 | 2.925633  |
| 23 | 1 | 0 | 1.938259  | -4.400534 | -0.155093 |
| 24 | 1 | 0 | -3.650552 | 0.20688   | -1.583766 |
| 25 | 1 | 0 | -1.608977 | 1.52815   | 0.689751  |
| 26 | 1 | 0 | 1.609551  | 0.230978  | 3.286315  |
| 27 | 1 | 0 | 4.079813  | -1.962769 | 3.709899  |
| 28 | 1 | 0 | 0.87838   | 2.649002  | -6.157167 |
| 29 | 1 | 0 | 0.530707  | 6.729016  | -4.148196 |
| 30 | 1 | 0 | -1.564722 | 5.576443  | -1.794044 |
| 31 | 1 | 0 | 3.97157   | 5.475511  | -1.596911 |
| 32 | 1 | 0 | 7.054437  | 2.605169  | 0.54058   |
| 33 | 1 | 0 | 5.105679  | -3.137844 | -2.27071  |
| 34 | 1 | 0 | 7.524944  | -0.815493 | -2.163949 |
| 35 | 1 | 0 | 7.140349  | -2.952028 | 0.43568   |
| 36 | 1 | 0 | 2.973458  | 4.189852  | 2.366636  |
| 37 | 1 | 0 | -4.630058 | 2.934884  | -4.327982 |
| 38 | 1 | 0 | -3.325793 | 4.189139  | -7.156825 |
| 39 | 1 | 0 | -3.497212 | 0.8481    | -6.730873 |
| 40 | 1 | 0 | -2.485399 | 0.683366  | 4.576453  |
| 41 | 1 | 0 | -1.387066 | -2.152944 | 6.017056  |
| 42 | 1 | 0 | -6.4635   | -0.492235 | 6.128811  |
| 43 | 1 | 0 | -5.089316 | -6.540692 | 1.65366   |
| 44 | 1 | 0 | -2.695056 | -6.555118 | 4.033396  |
| 45 | 1 | 0 | -5.808692 | -5.568106 | 4.820443  |

2\_c

Standard Orientation (A.U.)

| Center number | Atomic number | Atomic Type | X         | Y         | Z         |
|---------------|---------------|-------------|-----------|-----------|-----------|
| 0             | 6             | 0           | 1.818025  | -3.670372 | 1.559486  |
| 1             | 6             | 0           | -0.841921 | -3.050792 | 0.54816   |
| 2             | 6             | 0           | -0.731796 | -2.196132 | -2.245676 |
| 3             | 6             | 0           | 0.589467  | 0.265905  | -3.187224 |
| 4             | 6             | 0           | 2.594124  | 1.681472  | -1.561094 |
| 5             | 6             | 0           | 4.547211  | 0.242473  | 0.081957  |
| 6             | 6             | 0           | 3.50413   | -1.423247 | 2.23718   |
| 7             | 6             | 0           | -1.162975 | 2.518122  | -3.929577 |
| 8             | 6             | 0           | -1.40714  | 4.078715  | -1.494866 |
| 9             | 6             | 0           | 1.23506   | 3.972627  | -0.280456 |
| 10            | 8             | 0           | 6.141578  | 2.114555  | 1.215041  |
| 11            | 6             | 0           | 6.279919  | -1.300855 | -1.645325 |
| 12            | 8             | 0           | 1.195251  | 3.74807   | 2.411834  |
| 13            | 6             | 0           | -3.650875 | 1.928337  | -5.263237 |
| 14            | 6             | 0           | -2.455221 | -1.405306 | 2.350191  |
| 15            | 6             | 0           | -2.374377 | -2.413785 | 5.079956  |
| 16            | 8             | 0           | -3.88608  | -1.001653 | 6.779633  |
| 17            | 1             | 0           | 3.805738  | 2.608228  | -2.979666 |
| 18            | 1             | 0           | -1.833088 | -4.895635 | 0.451805  |
| 19            | 1             | 0           | 1.546708  | -0.324881 | -4.940593 |
| 20            | 6             | 0           | -5.212889 | -1.239463 | 1.472568  |
| 21            | 1             | 0           | -1.661877 | 0.514582  | 2.430606  |

|    |   |   |           |           |           |
|----|---|---|-----------|-----------|-----------|
| 22 | 1 | 0 | 1.631998  | -4.854689 | 3.266986  |
| 23 | 1 | 0 | 2.77974   | -4.889104 | 0.161359  |
| 24 | 1 | 0 | 0.22402   | -3.772522 | -3.223546 |
| 25 | 1 | 0 | -2.66349  | -2.218657 | -3.022794 |
| 26 | 1 | 0 | 2.50757   | -0.188168 | 3.579261  |
| 27 | 1 | 0 | 5.190518  | -2.138123 | 3.240639  |
| 28 | 1 | 0 | -0.028871 | 3.664196  | -5.2642   |
| 29 | 1 | 0 | -2.054785 | 6.029943  | -1.856297 |
| 30 | 1 | 0 | -2.787886 | 3.186922  | -0.215015 |
| 31 | 1 | 0 | 2.308232  | 5.702581  | -0.747474 |
| 32 | 1 | 0 | 5.070795  | 3.018101  | 2.412839  |
| 33 | 1 | 0 | 7.716475  | -2.300588 | -0.510861 |
| 34 | 1 | 0 | 5.213726  | -2.70594  | -2.756134 |
| 35 | 1 | 0 | 7.27251   | -0.028697 | -2.966618 |
| 36 | 1 | 0 | 0.25545   | 5.162342  | 3.111823  |
| 37 | 1 | 0 | -4.549093 | 3.689262  | -5.93737  |
| 38 | 1 | 0 | -3.346943 | 0.697375  | -6.922709 |
| 39 | 1 | 0 | -5.023027 | 0.981455  | -4.011258 |
| 40 | 1 | 0 | -0.446637 | -2.283734 | 5.846774  |
| 41 | 1 | 0 | -2.91583  | -4.446944 | 5.096019  |
| 42 | 1 | 0 | -5.650725 | -1.322055 | 6.401317  |
| 43 | 1 | 0 | -6.314669 | 0.032165  | 2.706706  |
| 44 | 1 | 0 | -5.387905 | -0.489397 | -0.458801 |
| 45 | 1 | 0 | -6.120193 | -3.126573 | 1.491836  |

2\_d

Standard Orientation (A.U.)

| Center number | Atomic number | Atomic Type | X         | Y         | Z         |
|---------------|---------------|-------------|-----------|-----------|-----------|
| 0             | 6             | 0           | 1.181423  | -2.566571 | 2.898415  |
| 1             | 6             | 0           | -1.144046 | -2.456787 | 1.13134   |
| 2             | 6             | 0           | -1.627322 | 0.155465  | -0.064658 |
| 3             | 6             | 0           | -0.014957 | 0.659255  | -2.428336 |
| 4             | 6             | 0           | 2.799492  | 1.333695  | -1.990723 |
| 5             | 6             | 0           | 4.431954  | -0.185835 | -0.084783 |
| 6             | 6             | 0           | 3.215336  | -0.537026 | 2.550296  |
| 7             | 6             | 0           | -0.905675 | 2.988263  | -3.981476 |
| 8             | 6             | 0           | 0.295927  | 5.232253  | -2.584964 |
| 9             | 6             | 0           | 2.875254  | 4.278486  | -1.628393 |
| 10            | 8             | 0           | 6.759634  | 1.148071  | 0.238582  |
| 11            | 6             | 0           | 5.170467  | -2.744043 | -1.208611 |
| 12            | 8             | 0           | 3.467526  | 5.156821  | 0.858885  |
| 13            | 6             | 0           | -3.738248 | 3.2612    | -4.453582 |
| 14            | 6             | 0           | -3.540913 | -3.607343 | 2.380225  |
| 15            | 6             | 0           | -4.526535 | -2.219316 | 4.716237  |
| 16            | 8             | 0           | -5.145968 | 0.316692  | 4.120506  |
| 17            | 1             | 0           | 3.731714  | 1.040203  | -3.83462  |
| 18            | 1             | 0           | -0.750633 | -3.729672 | -0.479729 |
| 19            | 1             | 0           | -0.156118 | -1.043575 | -3.630242 |
| 20            | 6             | 0           | -3.157935 | -6.408822 | 3.034248  |
| 21            | 1             | 0           | -5.063823 | -3.494444 | 0.951367  |
| 22            | 1             | 0           | 0.554095  | -2.416851 | 4.884085  |
| 23            | 1             | 0           | 2.062571  | -4.450191 | 2.743058  |
| 24            | 1             | 0           | -3.628861 | 0.222668  | -0.625357 |
| 25            | 1             | 0           | -1.431384 | 1.66661   | 1.355137  |
| 26            | 1             | 0           | 2.479743  | 1.296277  | 3.202432  |
| 27            | 1             | 0           | 4.798957  | -0.990819 | 3.831711  |
| 28            | 1             | 0           | 0.031513  | 2.832437  | -5.845702 |
| 29            | 1             | 0           | 0.455644  | 6.943286  | -3.764858 |
| 30            | 1             | 0           | -0.891082 | 5.74901   | -0.940876 |
| 31            | 1             | 0           | 4.431293  | 5.044355  | -2.771194 |
| 32            | 1             | 0           | 6.305062  | 2.771687  | 0.994662  |
| 33            | 1             | 0           | 6.35849   | -2.436477 | -2.893787 |
| 34            | 1             | 0           | 6.282174  | -3.847488 | 0.169845  |
| 35            | 1             | 0           | 3.499904  | -3.857927 | -1.765728 |
| 36            | 1             | 0           | 2.018369  | 4.882039  | 1.952505  |
| 37            | 1             | 0           | -4.791064 | 3.625177  | -2.688909 |
| 38            | 1             | 0           | -4.115528 | 4.857012  | -5.747465 |
| 39            | 1             | 0           | -4.532598 | 1.537748  | -5.32696  |
| 40            | 1             | 0           | -3.097397 | -2.300234 | 6.251728  |
| 41            | 1             | 0           | -6.217624 | -3.248373 | 5.415178  |
| 42            | 1             | 0           | -5.813969 | 1.120153  | 5.627355  |
| 43            | 1             | 0           | -2.476736 | -7.47095  | 1.371757  |

| 44            | 1             | 0           | -1.756955                   | -6.664948 | 4.561635  |
|---------------|---------------|-------------|-----------------------------|-----------|-----------|
| 45            | 1             | 0           | -4.942932                   | -7.29098  | 3.664298  |
| <b>2_e</b>    |               |             | Standard Orientation (A.U.) |           |           |
| Center number | Atomic number | Atomic Type | X                           | Y         | Z         |
| 0             | 6             | 0           | 0.888031                    | -1.976937 | 3.39925   |
| 1             | 6             | 0           | -1.368567                   | -1.948302 | 1.560776  |
| 2             | 6             | 0           | -1.258381                   | 0.205073  | -0.401671 |
| 3             | 6             | 0           | 0.823883                    | -0.100267 | -2.41724  |
| 4             | 6             | 0           | 3.472604                    | 0.93884   | -1.667692 |
| 5             | 6             | 0           | 4.283429                    | 0.803532  | 1.144399  |
| 6             | 6             | 0           | 3.564738                    | -1.776815 | 2.307483  |
| 7             | 6             | 0           | 0.264414                    | 1.169296  | -5.071836 |
| 8             | 6             | 0           | 2.436633                    | 3.106251  | -5.50638  |
| 9             | 6             | 0           | 3.609569                    | 3.569423  | -2.914252 |
| 10            | 8             | 0           | 3.094281                    | 2.705416  | 2.634949  |
| 11            | 6             | 0           | 7.167469                    | 1.155926  | 1.322654  |
| 12            | 8             | 0           | 2.280562                    | 5.492138  | -1.525456 |
| 13            | 6             | 0           | -2.350469                   | 2.372565  | -5.411399 |
| 14            | 6             | 0           | -3.926722                   | -1.882095 | 3.010693  |
| 15            | 6             | 0           | -4.110328                   | -3.945665 | 5.058591  |
| 16            | 8             | 0           | -6.456083                   | -3.9497   | 6.353272  |
| 17            | 1             | 0           | 4.867732                    | -0.213783 | -2.712024 |
| 18            | 1             | 0           | -1.338684                   | -3.74673  | 0.479572  |
| 19            | 1             | 0           | 0.999558                    | -2.149298 | -2.743496 |
| 20            | 6             | 0           | -6.236691                   | -2.083507 | 1.260205  |
| 21            | 1             | 0           | -4.018091                   | -0.036409 | 4.00886   |
| 22            | 1             | 0           | 0.654737                    | -0.42556  | 4.772511  |
| 23            | 1             | 0           | 0.833434                    | -3.756488 | 4.483721  |
| 24            | 1             | 0           | -3.08558                    | 0.23539   | -1.3777   |
| 25            | 1             | 0           | -1.076531                   | 2.017552  | 0.610813  |
| 26            | 1             | 0           | 4.880062                    | -2.149644 | 3.88538   |
| 27            | 1             | 0           | 3.914809                    | -3.279941 | 0.897799  |
| 28            | 1             | 0           | 0.417946                    | -0.319084 | -6.521422 |
| 29            | 1             | 0           | 3.88955                     | 2.300261  | -6.765817 |
| 30            | 1             | 0           | 1.790574                    | 4.889659  | -6.373781 |
| 31            | 1             | 0           | 5.554964                    | 4.291476  | -3.040408 |
| 32            | 1             | 0           | 3.005033                    | 4.242286  | 1.607435  |
| 33            | 1             | 0           | 8.197652                    | -0.408303 | 0.397077  |
| 34            | 1             | 0           | 7.766154                    | 2.948107  | 0.435657  |
| 35            | 1             | 0           | 7.723004                    | 1.226187  | 3.330605  |
| 36            | 1             | 0           | 0.476487                    | 5.153387  | -1.614213 |
| 37            | 1             | 0           | -2.494097                   | 3.227076  | -7.310582 |
| 38            | 1             | 0           | -3.890867                   | 0.977872  | -5.235647 |
| 39            | 1             | 0           | -2.722576                   | 3.890645  | -4.02366  |
| 40            | 1             | 0           | -2.542617                   | -3.767252 | 6.427558  |
| 41            | 1             | 0           | -3.952723                   | -5.829523 | 4.169981  |
| 42            | 1             | 0           | -6.632262                   | -2.338042 | 7.217137  |
| 43            | 1             | 0           | -6.018423                   | -3.683409 | -0.069637 |
| 44            | 1             | 0           | -7.948255                   | -2.433151 | 2.392853  |
| 45            | 1             | 0           | -6.553887                   | -0.356444 | 0.139492  |
| <b>2_f</b>    |               |             | Standard Orientation (A.U.) |           |           |
| Center number | Atomic number | Atomic Type | X                           | Y         | Z         |
| 0             | 6             | 0           | 0.980897                    | -1.068625 | 4.260427  |
| 1             | 6             | 0           | -1.297157                   | -1.700282 | 2.585461  |
| 2             | 6             | 0           | -1.587934                   | 0.035065  | 0.268804  |
| 3             | 6             | 0           | 0.320718                    | -0.474305 | -1.870022 |
| 4             | 6             | 0           | 3.035416                    | 0.669516  | -1.590109 |
| 5             | 6             | 0           | 4.073377                    | 1.196718  | 1.100227  |
| 6             | 6             | 0           | 3.566505                    | -1.007736 | 2.957357  |
| 7             | 6             | 0           | -0.553051                   | 0.576955  | -4.476191 |
| 8             | 6             | 0           | 0.413934                    | 3.296387  | -4.427703 |
| 9             | 6             | 0           | 3.12818                     | 3.037533  | -3.438486 |
| 10            | 8             | 0           | 3.043906                    | 3.523249  | 2.118039  |
| 11            | 6             | 0           | 6.933467                    | 1.645547  | 0.966191  |
| 12            | 8             | 0           | 4.150016                    | 5.294541  | -2.472319 |
| 13            | 6             | 0           | -3.336918                   | 0.26043   | -5.168763 |
| 14            | 6             | 0           | -3.751479                   | -1.868406 | 4.178566  |
| 15            | 6             | 0           | -5.829976                   | -3.386464 | 2.830441  |
| 16            | 8             | 0           | -5.035459                   | -5.796276 | 1.992717  |

|    |   |   |           |           |           |
|----|---|---|-----------|-----------|-----------|
| 17 | 1 | 0 | 4.33493   | -0.756465 | -2.376816 |
| 18 | 1 | 0 | -0.98986  | -3.623316 | 1.83383   |
| 19 | 1 | 0 | 0.466893  | -2.550628 | -2.007985 |
| 20 | 6 | 0 | -4.798108 | 0.695416  | 5.03326   |
| 21 | 1 | 0 | -3.262741 | -2.954781 | 5.905512  |
| 22 | 1 | 0 | 0.681732  | 0.751886  | 5.245619  |
| 23 | 1 | 0 | 1.081234  | -2.494628 | 5.784522  |
| 24 | 1 | 0 | -3.48701  | -0.29195  | -0.512523 |
| 25 | 1 | 0 | -1.595402 | 2.04935   | 0.83385   |
| 26 | 1 | 0 | 5.011936  | -0.899603 | 4.45833   |
| 27 | 1 | 0 | 3.891857  | -2.807435 | 1.946894  |
| 28 | 1 | 0 | 0.564699  | -0.453069 | -5.91669  |
| 29 | 1 | 0 | 0.332446  | 4.262281  | -6.274055 |
| 30 | 1 | 0 | -0.700591 | 4.440009  | -3.074786 |
| 31 | 1 | 0 | 4.352672  | 2.531639  | -5.04915  |
| 32 | 1 | 0 | 1.247073  | 3.297842  | 2.402983  |
| 33 | 1 | 0 | 7.378844  | 3.129293  | -0.420397 |
| 34 | 1 | 0 | 7.631752  | 2.24276   | 2.838527  |
| 35 | 1 | 0 | 7.908495  | -0.116485 | 0.422349  |
| 36 | 1 | 0 | 3.640142  | 5.408619  | -0.695532 |
| 37 | 1 | 0 | -3.968315 | -1.717133 | -4.927777 |
| 38 | 1 | 0 | -4.577338 | 1.477381  | -4.012113 |
| 39 | 1 | 0 | -3.649583 | 0.787781  | -7.1646   |
| 40 | 1 | 0 | -6.472692 | -2.383646 | 1.118945  |
| 41 | 1 | 0 | -7.494294 | -3.535518 | 4.102589  |
| 42 | 1 | 0 | -4.485217 | -6.766125 | 3.452736  |
| 43 | 1 | 0 | -5.449387 | 1.834802  | 3.408795  |
| 44 | 1 | 0 | -6.430069 | 0.445922  | 6.312178  |
| 45 | 1 | 0 | -3.369608 | 1.812367  | 6.064257  |

**Table S9.** Gibbs free energies<sup>a</sup> and equilibrium populations<sup>b</sup> of low-energy conformers of compound **5**.

| Conformers | $\Delta G(\text{a.u.})$ | P(%) / 100 | G(a.u.)     |
|------------|-------------------------|------------|-------------|
| <b>5_a</b> | 0.00348                 | 1.29       | -888.977565 |
| <b>5_b</b> | 0.00949                 | 0.0        | -888.971558 |
| <b>5_c</b> | 0.01665                 | 0.0        | -888.964394 |
| <b>5_d</b> | 0.0                     | 51.35      | -888.981043 |
| <b>5_e</b> | 0.00354                 | 1.21       | -888.977502 |
| <b>5_f</b> | 0.004                   | 0.74       | -888.977044 |
| <b>5_g</b> | 0.00018                 | 42.27      | -888.980859 |
| <b>5_h</b> | 0.00264                 | 3.14       | -888.978405 |

<sup>a</sup>wB97M-V/def2-TZVP, in a.u. <sup>b</sup>From  $\Delta G$  values at 298.15K.

**Table S10.** Cartesian coordinates for the low-energy reoptimized random search conformers of compound **5** at B3LYP-D3(BJ)/6-31G\* level of theory in methanol.

| <b>5_a</b>    |               |             | <b>Standard Orientation (A.U.)</b> |           |           |
|---------------|---------------|-------------|------------------------------------|-----------|-----------|
| Center number | Atomic number | Atomic Type | X                                  | Y         | Z         |
| 0             | 6             | 0           | 3.699469                           | 0.641288  | -0.746003 |
| 1             | 6             | 0           | 1.768089                           | 2.454823  | -1.966636 |
| 2             | 6             | 0           | -0.943302                          | 1.397064  | -2.279731 |
| 3             | 6             | 0           | -1.955092                          | -0.418293 | -0.26766  |
| 4             | 6             | 0           | -1.088262                          | -3.183682 | -0.639001 |
| 5             | 6             | 0           | 1.645903                           | -3.79879  | 0.097068  |
| 6             | 6             | 0           | 3.536922                           | -2.162656 | -1.451177 |
| 7             | 6             | 0           | -4.865208                          | -0.663891 | -0.274873 |
| 8             | 6             | 0           | -5.295831                          | -3.021901 | 1.364356  |
| 9             | 6             | 0           | -3.134867                          | -4.850354 | 0.66112   |
| 10            | 1             | 0           | -1.182159                          | -3.575632 | -2.687197 |
| 11            | 1             | 0           | -1.411399                          | 0.270973  | 1.622853  |
| 12            | 6             | 0           | -6.337484                          | 1.656869  | 0.59901   |
| 13            | 6             | 0           | 2.138385                           | -3.573278 | 2.955625  |
| 14            | 8             | 0           | 2.062013                           | -6.34876  | -0.659493 |
| 15            | 8             | 0           | 5.992326                           | -3.301519 | -1.273811 |
| 16            | 6             | 0           | 1.90386                            | 5.136652  | -0.731963 |
| 17            | 6             | 0           | 4.580262                           | 6.235096  | -0.948932 |
| 18            | 6             | 0           | 1.051808                           | 5.291951  | 2.048626  |
| 19            | 8             | 0           | 0.167522                           | 6.799777  | -1.990585 |

| 20            | 8             | 0           | -1.556512                   | 4.922214  | 2.361318  |
|---------------|---------------|-------------|-----------------------------|-----------|-----------|
| 21            | 1             | 0           | 2.454133                    | 2.787412  | -3.918845 |
| 22            | 1             | 0           | 3.623876                    | 0.810618  | 1.329899  |
| 23            | 1             | 0           | 5.606409                    | 1.256596  | -1.314449 |
| 24            | 1             | 0           | -2.221987                   | 3.026188  | -2.465673 |
| 25            | 1             | 0           | -1.039253                   | 0.400307  | -4.113644 |
| 26            | 1             | 0           | 3.035547                    | -2.376105 | -3.461135 |
| 27            | 1             | 0           | -5.445327                   | -1.118442 | -2.238888 |
| 28            | 1             | 0           | -7.191558                   | -3.850615 | 1.097374  |
| 29            | 1             | 0           | -5.150632                   | -2.464834 | 3.374384  |
| 30            | 1             | 0           | -2.401041                   | -5.848856 | 2.330553  |
| 31            | 1             | 0           | -3.779894                   | -6.328571 | -0.65516  |
| 32            | 1             | 0           | -8.388101                   | 1.257785  | 0.633058  |
| 33            | 1             | 0           | -6.046946                   | 3.285414  | -0.67621  |
| 34            | 1             | 0           | -5.74616                    | 2.240815  | 2.512291  |
| 35            | 1             | 0           | 1.13777                     | -5.100407 | 3.951247  |
| 36            | 1             | 0           | 4.170306                    | -3.814645 | 3.379923  |
| 37            | 1             | 0           | 1.517064                    | -1.753247 | 3.75823   |
| 38            | 1             | 0           | 3.890072                    | -6.507096 | -0.859103 |
| 39            | 1             | 0           | 6.73296                     | -2.830435 | 0.34084   |
| 40            | 1             | 0           | 4.53376                     | 8.261296  | -0.464863 |
| 41            | 1             | 0           | 5.309011                    | 6.045068  | -2.897923 |
| 42            | 1             | 0           | 5.9249                      | 5.287337  | 0.33316   |
| 43            | 1             | 0           | 2.02861                     | 3.854365  | 3.195951  |
| 44            | 1             | 0           | 1.630603                    | 7.172151  | 2.7802    |
| 45            | 1             | 0           | 0.384037                    | 6.629889  | -3.806237 |
| 46            | 1             | 0           | -2.379291                   | 5.881796  | 1.02139   |
| <b>5_b</b>    |               |             | Standard Orientation (A.U.) |           |           |
| Center number | Atomic number | Atomic Type | X                           | Y         | Z         |
| 0             | 6             | 0           | 3.131929                    | 0.864815  | -1.553838 |
| 1             | 6             | 0           | 0.552609                    | 2.188494  | -1.000073 |
| 2             | 6             | 0           | -0.88175                    | 1.135844  | 1.304431  |
| 3             | 6             | 0           | -1.998958                   | -1.512508 | 0.863139  |
| 4             | 6             | 0           | -0.566698                   | -3.207296 | -1.013526 |
| 5             | 6             | 0           | 2.200464                    | -3.861703 | -0.412441 |
| 6             | 6             | 0           | 3.88123                     | -1.468347 | -0.016207 |
| 7             | 6             | 0           | -4.716812                   | -1.508056 | -0.223274 |
| 8             | 6             | 0           | -5.032282                   | -4.12709  | -1.532303 |
| 9             | 6             | 0           | -2.415707                   | -5.420855 | -1.388392 |
| 10            | 1             | 0           | -0.493922                   | -2.19444  | -2.835648 |
| 11            | 1             | 0           | -2.065232                   | -2.511249 | 2.701735  |
| 12            | 6             | 0           | -6.748572                   | -0.935457 | 1.743931  |
| 13            | 6             | 0           | 2.49262                     | -5.672849 | 1.830159  |
| 14            | 8             | 0           | 3.303958                    | -5.002738 | -2.615    |
| 15            | 8             | 0           | 4.13016                     | -0.721606 | 2.559012  |
| 16            | 6             | 0           | 0.820938                    | 5.10355   | -0.88323  |
| 17            | 6             | 0           | 1.985454                    | 6.168882  | -3.322575 |
| 18            | 6             | 0           | 2.321938                    | 5.98263   | 1.441722  |
| 19            | 8             | 0           | -1.679144                   | 6.086933  | -0.64152  |
| 20            | 8             | 0           | 2.075894                    | 8.664291  | 1.549909  |
| 21            | 1             | 0           | -0.683769                   | 1.893159  | -2.655464 |
| 22            | 1             | 0           | 4.693223                    | 2.209336  | -1.259215 |
| 23            | 1             | 0           | 3.228139                    | 0.321189  | -3.562664 |
| 24            | 1             | 0           | 0.389009                    | 1.068732  | 2.939354  |
| 25            | 1             | 0           | -2.422887                   | 2.460035  | 1.75079   |
| 26            | 1             | 0           | 5.752772                    | -2.066752 | -0.733866 |
| 27            | 1             | 0           | -4.792954                   | -0.015782 | -1.684319 |
| 28            | 1             | 0           | -5.636564                   | -3.891221 | -3.513766 |
| 29            | 1             | 0           | -6.496775                   | -5.280541 | -0.596914 |
| 30            | 1             | 0           | -2.348658                   | -6.701742 | 0.25649   |
| 31            | 1             | 0           | -2.005141                   | -6.570034 | -3.083871 |
| 32            | 1             | 0           | -8.650795                   | -0.887033 | 0.882033  |
| 33            | 1             | 0           | -6.423574                   | 0.914102  | 2.656796  |
| 34            | 1             | 0           | -6.762755                   | -2.396114 | 3.241087  |
| 35            | 1             | 0           | 1.614371                    | -7.514454 | 1.400975  |
| 36            | 1             | 0           | 4.516468                    | -6.043315 | 2.195341  |
| 37            | 1             | 0           | 1.6097                      | -4.924539 | 3.563403  |
| 38            | 1             | 0           | 2.179293                    | -6.336868 | -3.183763 |
| 39            | 1             | 0           | 5.061004                    | -2.020124 | 3.45648   |
| 40            | 1             | 0           | 3.923727                    | 5.477851  | -3.656831 |
| 41            | 1             | 0           | 2.059112                    | 8.248977  | -3.216366 |



| 42            | 1             | 0           | 0.792945                    | 5.630632  | -4.946784 |
|---------------|---------------|-------------|-----------------------------|-----------|-----------|
| 43            | 1             | 0           | 1.512809                    | 5.105283  | 3.154333  |
| 44            | 1             | 0           | 4.330315                    | 5.416344  | 1.304588  |
| 45            | 1             | 0           | -1.467549                   | 7.82574   | -0.067313 |
| 46            | 1             | 0           | 2.631344                    | 9.250815  | 3.193663  |
| <b>5_c</b>    |               |             | Standard Orientation (A.U.) |           |           |
| Center number | Atomic number | Atomic Type | X                           | Y         | Z         |
| 0             | 6             | 0           | 3.066514                    | 0.984322  | -2.068045 |
| 1             | 6             | 0           | 0.654612                    | 2.672417  | -2.091579 |
| 2             | 6             | 0           | -1.932444                   | 1.333732  | -1.634926 |
| 3             | 6             | 0           | -1.970845                   | -1.157174 | -0.170817 |
| 4             | 6             | 0           | -0.456512                   | -3.26491  | -1.541485 |
| 5             | 6             | 0           | 2.250477                    | -3.603967 | -0.496751 |
| 6             | 6             | 0           | 3.553163                    | -1.021745 | -0.000915 |
| 7             | 6             | 0           | -4.659947                   | -2.231523 | 0.210252  |
| 8             | 6             | 0           | -4.181421                   | -5.076445 | 0.53455   |
| 9             | 6             | 0           | -2.18339                    | -5.644988 | -1.48847  |
| 10            | 1             | 0           | -0.188107                   | -2.701036 | -3.528096 |
| 11            | 1             | 0           | -1.144146                   | -0.855223 | 1.713243  |
| 12            | 6             | 0           | -6.133195                   | -0.994697 | 2.358962  |
| 13            | 6             | 0           | 2.388472                    | -5.221082 | 1.903593  |
| 14            | 8             | 0           | 3.784757                    | -4.742484 | -2.423609 |
| 15            | 8             | 0           | 2.956569                    | -0.243187 | 2.473669  |
| 16            | 6             | 0           | 0.834976                    | 5.258407  | -0.652997 |
| 17            | 6             | 0           | 3.082451                    | 6.851236  | -1.575947 |
| 18            | 6             | 0           | 0.842021                    | 5.118588  | 2.257593  |
| 19            | 8             | 0           | -1.424746                   | 6.665863  | -1.155781 |
| 20            | 8             | 0           | 3.260622                    | 4.638627  | 3.330504  |
| 21            | 1             | 0           | 0.583487                    | 3.331797  | -4.078372 |
| 22            | 1             | 0           | 4.719019                    | 2.25212   | -2.108436 |
| 23            | 1             | 0           | 3.164838                    | -0.049757 | -3.875266 |
| 24            | 1             | 0           | -3.209319                   | 2.702535  | -0.720746 |
| 25            | 1             | 0           | -2.789037                   | 0.937336  | -3.500972 |
| 26            | 1             | 0           | 5.595568                    | -1.478378 | -0.134228 |
| 27            | 1             | 0           | -5.728732                   | -1.966202 | -1.573706 |
| 28            | 1             | 0           | -5.909996                   | -6.2293   | 0.335012  |
| 29            | 1             | 0           | -3.403887                   | -5.434666 | 2.442215  |
| 30            | 1             | 0           | -1.160141                   | -7.428422 | -1.144751 |
| 31            | 1             | 0           | -3.127593                   | -5.851911 | -3.33786  |
| 32            | 1             | 0           | -6.379535                   | 1.054111  | 2.035321  |
| 33            | 1             | 0           | -5.12842                    | -1.234551 | 4.176723  |
| 34            | 1             | 0           | -8.035429                   | -1.833487 | 2.564759  |
| 35            | 1             | 0           | 1.150108                    | -4.4926   | 3.406937  |
| 36            | 1             | 0           | 1.851335                    | -7.193455 | 1.485597  |
| 37            | 1             | 0           | 4.340909                    | -5.230894 | 2.630666  |
| 38            | 1             | 0           | 2.94753                     | -6.286676 | -2.957179 |
| 39            | 1             | 0           | 3.623991                    | 1.453997  | 2.805072  |
| 40            | 1             | 0           | 2.996609                    | 7.083075  | -3.649258 |
| 41            | 1             | 0           | 4.934088                    | 6.011077  | -1.124057 |
| 42            | 1             | 0           | 2.975663                    | 8.755939  | -0.726465 |
| 43            | 1             | 0           | 0.082203                    | 6.931712  | 2.963678  |
| 44            | 1             | 0           | -0.399415                   | 3.593878  | 2.927064  |
| 45            | 1             | 0           | -1.771579                   | 6.573404  | -2.957766 |
| 46            | 1             | 0           | 4.370802                    | 6.066318  | 3.028382  |
| <b>5_d</b>    |               |             | Standard Orientation (A.U.) |           |           |
| Center number | Atomic number | Atomic Type | X                           | Y         | Z         |
| 0             | 6             | 0           | 3.102627                    | 0.955056  | 0.590152  |
| 1             | 6             | 0           | 1.129208                    | 2.458071  | -0.943328 |
| 2             | 6             | 0           | -1.644799                   | 1.699074  | -0.42049  |
| 3             | 6             | 0           | -2.11676                    | -1.066623 | 0.29323   |
| 4             | 6             | 0           | -0.693741                   | -3.088292 | -1.29423  |
| 5             | 6             | 0           | 1.948072                    | -3.782446 | -0.265903 |
| 6             | 6             | 0           | 3.823468                    | -1.57252  | -0.607729 |
| 7             | 6             | 0           | -4.92677                    | -1.840377 | 0.137662  |
| 8             | 6             | 0           | -4.793485                   | -4.733975 | 0.23136   |
| 9             | 6             | 0           | -2.541688                   | -5.380217 | -1.48411  |
| 10            | 1             | 0           | -0.377711                   | -2.347333 | -3.217052 |
| 11            | 1             | 0           | -1.571423                   | -1.320334 | 2.290189  |
| 12            | 6             | 0           | -6.624159                   | -0.648314 | 2.140876  |
| 13            | 6             | 0           | 1.920782                    | -4.759553 | 2.462155  |
| 14            | 8             | 0           | 3.062304                    | -5.698025 | -1.852573 |

| 15            | 8             | 0           | 6.232252                    | -2.278732 | 0.32071   |
|---------------|---------------|-------------|-----------------------------|-----------|-----------|
| 16            | 6             | 0           | 1.506849                    | 5.358197  | -0.705556 |
| 17            | 6             | 0           | 3.89628                     | 6.241475  | -2.102964 |
| 18            | 6             | 0           | 1.603403                    | 6.213923  | 2.072811  |
| 19            | 8             | 0           | -0.633826                   | 6.525963  | -1.844068 |
| 20            | 8             | 0           | 1.422733                    | 8.897595  | 2.058699  |
| 21            | 1             | 0           | 1.499383                    | 2.042007  | -2.954544 |
| 22            | 1             | 0           | 2.495869                    | 0.69248   | 2.569473  |
| 23            | 1             | 0           | 4.894166                    | 2.010389  | 0.675203  |
| 24            | 1             | 0           | -2.419698                   | 2.89271   | 1.102781  |
| 25            | 1             | 0           | -2.76533                    | 2.18325   | -2.109233 |
| 26            | 1             | 0           | 3.945869                    | -1.275093 | -2.680115 |
| 27            | 1             | 0           | -5.633764                   | -1.2849   | -1.755083 |
| 28            | 1             | 0           | -6.56687                    | -5.657325 | -0.365638 |
| 29            | 1             | 0           | -4.40829                    | -5.337864 | 2.19721   |
| 30            | 1             | 0           | -1.662719                   | -7.19795  | -0.957529 |
| 31            | 1             | 0           | -3.182864                   | -5.601819 | -3.454613 |
| 32            | 1             | 0           | -6.678209                   | 1.431021  | 1.965969  |
| 33            | 1             | 0           | -5.939285                   | -1.113425 | 4.062296  |
| 34            | 1             | 0           | -8.586464                   | -1.346316 | 1.9794    |
| 35            | 1             | 0           | 1.30577                     | -3.312979 | 3.826155  |
| 36            | 1             | 0           | 0.635324                    | -6.395284 | 2.654917  |
| 37            | 1             | 0           | 3.840834                    | -5.349318 | 3.000322  |
| 38            | 1             | 0           | 2.215227                    | -7.292519 | -1.529278 |
| 39            | 1             | 0           | 6.570119                    | -3.935331 | -0.411113 |
| 40            | 1             | 0           | 4.121657                    | 8.302002  | -1.878124 |
| 41            | 1             | 0           | 3.701828                    | 5.814283  | -4.134164 |
| 42            | 1             | 0           | 5.628176                    | 5.325663  | -1.387238 |
| 43            | 1             | 0           | -0.001116                   | 5.376552  | 3.121664  |
| 44            | 1             | 0           | 3.382985                    | 5.584778  | 2.973283  |
| 45            | 1             | 0           | -0.630162                   | 8.265199  | -1.234008 |
| 46            | 1             | 0           | 1.153831                    | 9.498628  | 3.767997  |
| <b>5_e</b>    |               |             | Standard Orientation (A.U.) |           |           |
| Center number | Atomic number | Atomic Type | X                           | Y         | Z         |
| 0             | 6             | 0           | 2.869227                    | 1.123008  | 0.290773  |
| 1             | 6             | 0           | 0.956568                    | 2.363618  | -1.533701 |
| 2             | 6             | 0           | -1.85609                    | 1.767177  | -0.966131 |
| 3             | 6             | 0           | -2.410231                   | -0.726433 | 0.399014  |
| 4             | 6             | 0           | -1.058054                   | -3.068297 | -0.742831 |
| 5             | 6             | 0           | 1.526377                    | -3.673562 | 0.429261  |
| 6             | 6             | 0           | 3.483481                    | -1.63966  | -0.33285  |
| 7             | 6             | 0           | -5.295695                   | -1.374665 | 0.405402  |
| 8             | 6             | 0           | -5.499662                   | -3.834748 | -1.15564  |
| 9             | 6             | 0           | -3.012782                   | -5.216924 | -0.621958 |
| 10            | 1             | 0           | -0.707991                   | -2.704194 | -2.771785 |
| 11            | 1             | 0           | -1.810315                   | -0.504348 | 2.378212  |
| 12            | 6             | 0           | -6.330576                   | -1.686478 | 3.092053  |
| 13            | 6             | 0           | 1.447094                    | -4.033032 | 3.315613  |
| 14            | 8             | 0           | 2.340026                    | -5.987763 | -0.691863 |
| 15            | 8             | 0           | 5.912954                    | -2.3476   | 0.619491  |
| 16            | 6             | 0           | 1.365859                    | 5.267506  | -1.847612 |
| 17            | 6             | 0           | 3.849726                    | 5.851381  | -3.231146 |
| 18            | 6             | 0           | 1.237819                    | 6.748128  | 0.663825  |
| 19            | 8             | 0           | -0.67056                    | 6.321717  | -3.277374 |
| 20            | 8             | 0           | 3.354908                    | 6.425181  | 2.255569  |
| 21            | 1             | 0           | 1.378871                    | 1.56158   | -3.420927 |
| 22            | 1             | 0           | 2.255713                    | 1.343746  | 2.271735  |
| 23            | 1             | 0           | 4.684503                    | 2.124229  | 0.161574  |
| 24            | 1             | 0           | -2.692532                   | 3.310119  | 0.159257  |
| 25            | 1             | 0           | -2.905231                   | 1.783523  | -2.77031  |
| 26            | 1             | 0           | 3.696385                    | -1.80827  | -2.399413 |
| 27            | 1             | 0           | -6.369201                   | 0.158346  | -0.517804 |
| 28            | 1             | 0           | -5.610705                   | -3.374653 | -3.191245 |
| 29            | 1             | 0           | -7.196874                   | -4.953052 | -0.681443 |
| 30            | 1             | 0           | -3.060363                   | -6.071786 | 1.280966  |
| 31            | 1             | 0           | -2.582208                   | -6.74569  | -1.965669 |
| 32            | 1             | 0           | -6.056036                   | 0.059841  | 4.206071  |
| 33            | 1             | 0           | -5.362222                   | -3.235669 | 4.106953  |
| 34            | 1             | 0           | -8.374402                   | -2.118114 | 3.071868  |
| 35            | 1             | 0           | 3.271156                    | -4.803185 | 3.970185  |
| 36            | 1             | 0           | 1.076374                    | -2.268888 | 4.363111  |

| 37            | 1             | 0           | -0.017675                   | -5.417907 | 3.834625  |
|---------------|---------------|-------------|-----------------------------|-----------|-----------|
| 38            | 1             | 0           | 4.14799                     | -6.097343 | -0.350388 |
| 39            | 1             | 0           | 5.984092                    | -1.90986  | 2.40256   |
| 40            | 1             | 0           | 5.534314                    | 5.143134  | -2.228922 |
| 41            | 1             | 0           | 4.040242                    | 7.91342   | -3.498543 |
| 42            | 1             | 0           | 3.841184                    | 4.963995  | -5.122425 |
| 43            | 1             | 0           | 0.933401                    | 8.759989  | 0.165997  |
| 44            | 1             | 0           | -0.41838                    | 6.135399  | 1.76554   |
| 45            | 1             | 0           | -0.816151                   | 5.387603  | -4.851716 |
| 46            | 1             | 0           | 4.800503                    | 7.261349  | 1.497103  |
| 5_f           |               |             | Standard Orientation (A.U.) |           |           |
| Center number | Atomic number | Atomic Type | X                           | Y         | Z         |
| 0             | 6             | 0           | 3.535278                    | 0.859307  | -1.066386 |
| 1             | 6             | 0           | 1.382529                    | 2.44449   | -2.240873 |
| 2             | 6             | 0           | -1.207603                   | 1.100887  | -2.331028 |
| 3             | 6             | 0           | -2.020241                   | -0.515142 | -0.064005 |
| 4             | 6             | 0           | -0.957433                   | -3.226292 | -0.064857 |
| 5             | 6             | 0           | 1.889597                    | -3.578929 | 0.36615   |
| 6             | 6             | 0           | 3.468676                    | -1.995279 | -1.546049 |
| 7             | 6             | 0           | -4.9238                     | -0.943088 | -0.020213 |
| 8             | 6             | 0           | -5.336606                   | -3.535509 | 1.309918  |
| 9             | 6             | 0           | -2.675136                   | -4.601747 | 1.829638  |
| 10            | 1             | 0           | -1.323074                   | -4.037669 | -1.957722 |
| 11            | 1             | 0           | -1.453655                   | 0.416029  | 1.714615  |
| 12            | 6             | 0           | -6.401434                   | 1.230138  | 1.175938  |
| 13            | 6             | 0           | 2.706854                    | -3.034804 | 3.104215  |
| 14            | 8             | 0           | 2.389979                    | -6.166113 | -0.194932 |
| 15            | 8             | 0           | 5.989608                    | -2.998561 | -1.583517 |
| 16            | 6             | 0           | 1.241861                    | 5.16996   | -1.111264 |
| 17            | 6             | 0           | 3.850062                    | 6.403371  | -0.98525  |
| 18            | 6             | 0           | -0.073059                   | 5.348809  | 1.477984  |
| 19            | 8             | 0           | -0.18972                    | 6.747187  | -2.775233 |
| 20            | 8             | 0           | 1.20743                     | 3.89991   | 3.33476   |
| 21            | 1             | 0           | 1.900136                    | 2.79781   | -4.232095 |
| 22            | 1             | 0           | 3.617041                    | 1.209212  | 0.979077  |
| 23            | 1             | 0           | 5.330239                    | 1.542228  | -1.873566 |
| 24            | 1             | 0           | -2.685609                   | 2.536032  | -2.697365 |
| 25            | 1             | 0           | -1.263593                   | -0.124707 | -4.020484 |
| 26            | 1             | 0           | 2.743051                    | -2.412286 | -3.453286 |
| 27            | 1             | 0           | -5.540288                   | -1.123385 | -2.009691 |
| 28            | 1             | 0           | -6.43124                    | -4.814562 | 0.080126  |
| 29            | 1             | 0           | -6.434027                   | -3.323816 | 3.072013  |
| 30            | 1             | 0           | -2.099927                   | -4.114046 | 3.773468  |
| 31            | 1             | 0           | -2.545739                   | -6.670711 | 1.648035  |
| 32            | 1             | 0           | -6.066426                   | 3.037053  | 0.180775  |
| 33            | 1             | 0           | -5.848992                   | 1.491384  | 3.175746  |
| 34            | 1             | 0           | -8.458166                   | 0.869081  | 1.128753  |
| 35            | 1             | 0           | 2.004471                    | -4.549965 | 4.344242  |
| 36            | 1             | 0           | 4.790313                    | -3.049247 | 3.261132  |
| 37            | 1             | 0           | 2.021152                    | -1.199433 | 3.815161  |
| 38            | 1             | 0           | 4.185185                    | -6.226622 | -0.621817 |
| 39            | 1             | 0           | 6.912179                    | -2.286135 | -0.162879 |
| 40            | 1             | 0           | 5.016879                    | 5.560595  | 0.515835  |
| 41            | 1             | 0           | 3.617882                    | 8.436785  | -0.586331 |
| 42            | 1             | 0           | 4.836159                    | 6.212014  | -2.813029 |
| 43            | 1             | 0           | -0.11499                    | 7.375123  | 2.001598  |
| 44            | 1             | 0           | -2.058836                   | 4.713162  | 1.279993  |
| 45            | 1             | 0           | -1.831805                   | 5.971458  | -3.04678  |
| 46            | 1             | 0           | 0.366341                    | 4.126507  | 4.948708  |
| 5_G           |               |             | Standard Orientation (A.U.) |           |           |
| Center number | Atomic number | Atomic Type | X                           | Y         | Z         |
| 0             | 6             | 0           | 3.117522                    | 1.087177  | 0.25631   |
| 1             | 6             | 0           | 1.064396                    | 2.352071  | -1.39171  |
| 2             | 6             | 0           | -1.681144                   | 1.666959  | -0.650143 |
| 3             | 6             | 0           | -2.067343                   | -0.93715  | 0.545109  |
| 4             | 6             | 0           | -0.754124                   | -3.184278 | -0.813516 |
| 5             | 6             | 0           | 1.920674                    | -3.75838  | 0.17507   |
| 6             | 6             | 0           | 3.778846                    | -1.617977 | -0.546793 |
| 7             | 6             | 0           | -4.869994                   | -1.723803 | 0.76655   |
| 8             | 6             | 0           | -4.687615                   | -4.576207 | 1.256189  |
| 9             | 6             | 0           | -2.607361                   | -5.459531 | -0.563943 |

|    |   |   |           |           |           |
|----|---|---|-----------|-----------|-----------|
| 10 | 1 | 0 | -0.527638 | -2.734889 | -2.837621 |
| 11 | 1 | 0 | -1.350095 | -0.850842 | 2.50081   |
| 12 | 6 | 0 | -6.383678 | -0.251105 | 2.729819  |
| 13 | 6 | 0 | 1.995033  | -4.322184 | 3.030036  |
| 14 | 8 | 0 | 2.75519   | -5.959534 | -1.141431 |
| 15 | 8 | 0 | 6.268384  | -2.302804 | 0.249761  |
| 16 | 6 | 0 | 1.435078  | 5.265799  | -1.562887 |
| 17 | 6 | 0 | 3.707753  | 5.974827  | -3.21027  |
| 18 | 6 | 0 | 1.654458  | 6.518518  | 1.057638  |
| 19 | 8 | 0 | -0.784683 | 6.427759  | -2.617277 |
| 20 | 8 | 0 | 1.540763  | 9.166094  | 0.865244  |
| 21 | 1 | 0 | 1.372466  | 1.641287  | -3.333949 |
| 22 | 1 | 0 | 2.597337  | 1.163846  | 2.277379  |
| 23 | 1 | 0 | 4.900745  | 2.146467  | 0.067014  |
| 24 | 1 | 0 | -2.426519 | 3.102782  | 0.662136  |
| 25 | 1 | 0 | -2.874348 | 1.816189  | -2.355167 |
| 26 | 1 | 0 | 3.899649  | -1.656098 | -2.626384 |
| 27 | 1 | 0 | -5.759164 | -1.449258 | -1.111531 |
| 28 | 1 | 0 | -6.50188  | -5.568505 | 0.976962  |
| 29 | 1 | 0 | -4.111165 | -4.890557 | 3.243111  |
| 30 | 1 | 0 | -1.640314 | -7.194594 | 0.050926  |
| 31 | 1 | 0 | -3.436987 | -5.882136 | -2.428938 |
| 32 | 1 | 0 | -6.472036 | 1.784563  | 2.274069  |
| 33 | 1 | 0 | -5.520255 | -0.444244 | 4.625249  |
| 34 | 1 | 0 | -8.346423 | -0.954583 | 2.85259   |
| 35 | 1 | 0 | 3.85947   | -5.10204  | 3.545285  |
| 36 | 1 | 0 | 1.641925  | -2.645613 | 4.218626  |
| 37 | 1 | 0 | 0.576059  | -5.767359 | 3.513907  |
| 38 | 1 | 0 | 4.580319  | -6.027164 | -0.892933 |
| 39 | 1 | 0 | 6.393667  | -2.038593 | 2.0637    |
| 40 | 1 | 0 | 5.472125  | 5.091862  | -2.53904  |
| 41 | 1 | 0 | 3.96453   | 8.04137   | -3.184496 |
| 42 | 1 | 0 | 3.402239  | 5.350898  | -5.183288 |
| 43 | 1 | 0 | 0.137383  | 5.782955  | 2.305983  |
| 44 | 1 | 0 | 3.482393  | 6.035198  | 1.929658  |
| 45 | 1 | 0 | -0.837482 | 6.084204  | -4.419434 |
| 46 | 1 | 0 | 0.157538  | 9.509786  | -0.304884 |

| 5_h           |               |             | Standard Orientation (A.U.) |           |           |
|---------------|---------------|-------------|-----------------------------|-----------|-----------|
| Center number | Atomic number | Atomic Type | X                           | Y         | Z         |
| 0             | 6             | 0           | 3.457619                    | 0.971606  | -0.106925 |
| 1             | 6             | 0           | 0.861474                    | 2.04747   | -0.897477 |
| 2             | 6             | 0           | -1.203043                   | 1.401563  | 1.051564  |
| 3             | 6             | 0           | -2.218614                   | -1.331934 | 0.993668  |
| 4             | 6             | 0           | -0.615668                   | -3.376284 | -0.318162 |
| 5             | 6             | 0           | 2.091082                    | -3.771406 | 0.646175  |
| 6             | 6             | 0           | 3.883459                    | -1.83692  | -0.629373 |
| 7             | 6             | 0           | -4.803505                   | -1.669652 | -0.323974 |
| 8             | 6             | 0           | -5.033249                   | -4.577154 | -0.717565 |
| 9             | 6             | 0           | -2.370407                   | -5.687443 | -0.205162 |
| 10            | 1             | 0           | -0.454963                   | -2.867098 | -2.339375 |
| 11            | 1             | 0           | -2.490275                   | -1.94828  | 2.972714  |
| 12            | 6             | 0           | -7.030722                   | -0.506105 | 1.094246  |
| 13            | 6             | 0           | 2.291066                    | -3.70763  | 3.541193  |
| 14            | 8             | 0           | 2.885479                    | -6.191562 | -0.2317   |
| 15            | 8             | 0           | 6.446438                    | -2.514459 | -0.103185 |
| 16            | 6             | 0           | 0.987414                    | 4.935844  | -1.462259 |
| 17            | 6             | 0           | 2.557107                    | 5.508314  | -3.82803  |
| 18            | 6             | 0           | 1.949868                    | 6.483429  | 0.80526   |
| 19            | 8             | 0           | -1.518465                   | 5.914059  | -1.860531 |
| 20            | 8             | 0           | 1.706192                    | 9.093141  | 0.361425  |
| 21            | 1             | 0           | 0.332819                    | 1.176223  | -2.724856 |
| 22            | 1             | 0           | 3.761514                    | 1.351805  | 1.928635  |
| 23            | 1             | 0           | 4.993416                    | 1.950513  | -1.117049 |
| 24            | 1             | 0           | -0.450368                   | 1.815191  | 2.952836  |
| 25            | 1             | 0           | -2.789121                   | 2.717528  | 0.773799  |
| 26            | 1             | 0           | 3.689045                    | -2.165259 | -2.678471 |
| 27            | 1             | 0           | -4.667512                   | -0.743015 | -2.197624 |
| 28            | 1             | 0           | -5.683204                   | -5.012704 | -2.650404 |
| 29            | 1             | 0           | -6.45158                    | -5.386715 | 0.580997  |
| 30            | 1             | 0           | -2.286724                   | -6.544416 | 1.695268  |
| 31            | 1             | 0           | -1.804029                   | -7.158678 | -1.558615 |

|    |   |   |           |           |           |
|----|---|---|-----------|-----------|-----------|
| 32 | 1 | 0 | -6.79584  | 1.552858  | 1.356519  |
| 33 | 1 | 0 | -7.235494 | -1.371982 | 2.986932  |
| 34 | 1 | 0 | -8.821824 | -0.808126 | 0.062379  |
| 35 | 1 | 0 | 4.238319  | -4.172359 | 4.134447  |
| 36 | 1 | 0 | 1.782497  | -1.85449  | 4.347997  |
| 37 | 1 | 0 | 1.03893   | -5.152232 | 4.369108  |
| 38 | 1 | 0 | 4.729222  | -6.151324 | -0.183013 |
| 39 | 1 | 0 | 6.874029  | -1.913641 | 1.580209  |
| 40 | 1 | 0 | 4.517853  | 4.824603  | -3.665082 |
| 41 | 1 | 0 | 2.61781   | 7.566941  | -4.131953 |
| 42 | 1 | 0 | 1.705972  | 4.594872  | -5.506941 |
| 43 | 1 | 0 | 0.896816  | 5.907835  | 2.524545  |
| 44 | 1 | 0 | 3.969891  | 6.092841  | 1.130179  |
| 45 | 1 | 0 | -2.117659 | 5.361128  | -3.505982 |
| 46 | 1 | 0 | 0.006977  | 9.31646   | -0.317875 |

**Table S11.** Gibbs free energies<sup>a</sup> and equilibrium populations<sup>b</sup> of low-energy conformers of compound **7**.

| Conformers | $\Delta G(\text{a.u.})$ | P(%) / 100 | G(a.u.)     |
|------------|-------------------------|------------|-------------|
| <b>7_a</b> | 0.00726                 | 0.02       | -812.530382 |
| <b>7_b</b> | 0.0                     | 52.84      | -812.537641 |
| <b>7_c</b> | 0.0042                  | 0.62       | -812.533444 |
| <b>7_d</b> | 0.0032                  | 1.78       | -812.534442 |
| <b>7_e</b> | 0.00381                 | 0.94       | -812.533832 |
| <b>7_f</b> | 0.00725                 | 0.02       | -812.53039  |
| <b>7_g</b> | 0.00757                 | 0.02       | -812.530067 |
| <b>7_h</b> | 0.0003                  | 38.58      | -812.537344 |
| <b>7_i</b> | 0.00468                 | 0.37       | -812.532966 |
| <b>7_j</b> | 0.00333                 | 1.56       | -812.534316 |
| <b>7_k</b> | 0.00494                 | 0.28       | -812.532705 |
| <b>7_l</b> | 0.006                   | 0.09       | -812.531639 |
| <b>7_m</b> | 0.00724                 | 0.03       | -812.530398 |
| <b>7_n</b> | 0.00324                 | 1.72       | -812.534405 |
| <b>7_o</b> | 0.00448                 | 0.46       | -812.533162 |
| <b>7_p</b> | 0.00528                 | 0.2        | -812.532358 |
| <b>7_q</b> | 0.00459                 | 0.41       | -812.533056 |
| <b>7_r</b> | 0.00646                 | 0.06       | -812.531183 |

<sup>a</sup>wB97M-V/def2-TZVP, in a.u. <sup>b</sup>From  $\Delta G$  values at 298.15K.

**Table S12.** Cartesian coordinates for the low-energy reoptimized random research conformers of compound **7** at B3LYP-D3(BJ)/6-31G\* level of theory in methanol.

| <b>7_a</b>    |               | Standard Orientation (A.U.) |           |           |           |
|---------------|---------------|-----------------------------|-----------|-----------|-----------|
| Center number | Atomic number | Atomic Type                 | X         | Y         | Z         |
| 0             | 6             | 0                           | 1.136158  | 0.534212  | 2.967955  |
| 1             | 6             | 0                           | 3.58578   | 1.652329  | 1.90576   |
| 2             | 6             | 0                           | 4.05392   | 1.559806  | -0.977049 |
| 3             | 6             | 0                           | 1.666924  | 1.398074  | -2.648644 |
| 4             | 6             | 0                           | -0.130501 | -0.967768 | -2.333609 |
| 5             | 6             | 0                           | 0.619817  | -3.001278 | -0.403628 |
| 6             | 6             | 0                           | 0.640192  | -2.272517 | 2.452027  |
| 7             | 6             | 0                           | -0.091077 | 3.726914  | -2.546431 |
| 8             | 6             | 0                           | -2.677266 | 2.698803  | -3.363123 |
| 9             | 6             | 0                           | -2.832253 | 0.111634  | -2.057451 |
| 10            | 6             | 0                           | -4.925545 | -1.593774 | -3.059179 |
| 11            | 8             | 0                           | -4.755256 | 4.327802  | -2.881984 |
| 12            | 6             | 0                           | 5.643227  | 3.865357  | -1.749165 |
| 13            | 8             | 0                           | 5.586369  | -0.663734 | -1.383295 |
| 14            | 6             | 0                           | -1.717376 | -3.245151 | 3.783368  |
| 15            | 6             | 0                           | -1.786477 | -6.072951 | 4.209977  |
| 16            | 6             | 0                           | -3.603216 | -1.815054 | 4.670146  |
| 17            | 8             | 0                           | 0.217719  | -6.890739 | 5.825107  |
| 18            | 1             | 0                           | -0.090958 | -1.947845 | -4.163656 |
| 19            | 1             | 0                           | 2.409516  | 1.306266  | -4.589162 |
| 20            | 1             | 0                           | 2.209073  | -3.334078 | 3.297869  |
| 21            | 1             | 0                           | -0.454695 | 1.667026  | 2.295403  |
| 22            | 1             | 0                           | 1.170111  | 0.806635  | 5.023748  |
| 23            | 1             | 0                           | 5.221873  | 0.727134  | 2.775809  |

|    |   |   |           |           |           |
|----|---|---|-----------|-----------|-----------|
| 24 | 1 | 0 | 3.654511  | 3.63342   | 2.509598  |
| 25 | 1 | 0 | 2.504518  | -3.664124 | -0.905447 |
| 26 | 1 | 0 | -0.659892 | -4.607485 | -0.679812 |
| 27 | 1 | 0 | 0.551335  | 5.288085  | -3.738292 |
| 28 | 1 | 0 | -0.243661 | 4.463412  | -0.61126  |
| 29 | 1 | 0 | -2.693508 | 2.428676  | -5.42039  |
| 30 | 1 | 0 | -3.223712 | 0.477437  | -0.053736 |
| 31 | 1 | 0 | -4.581361 | -2.104739 | -5.039631 |
| 32 | 1 | 0 | -5.063323 | -3.342704 | -1.959997 |
| 33 | 1 | 0 | -6.751559 | -0.624464 | -2.959576 |
| 34 | 1 | 0 | -4.848652 | 4.552484  | -1.063205 |
| 35 | 1 | 0 | 4.631675  | 5.642688  | -1.437114 |
| 36 | 1 | 0 | 6.150613  | 3.766855  | -3.757898 |
| 37 | 1 | 0 | 7.392799  | 3.901931  | -0.645876 |
| 38 | 1 | 0 | 5.886263  | -0.788619 | -3.189355 |
| 39 | 1 | 0 | -3.639325 | -6.634553 | 4.967487  |
| 40 | 1 | 0 | -1.492878 | -7.107585 | 2.442639  |
| 41 | 1 | 0 | -5.223575 | -2.661912 | 5.608548  |
| 42 | 1 | 0 | -3.628628 | 0.229201  | 4.502932  |
| 43 | 1 | 0 | 0.050673  | -5.943533 | 7.386885  |

**7\_b**

Standard Orientation (A.U.)

| Center number | Atomic number | Atomic Type | X         | Y         | Z         |
|---------------|---------------|-------------|-----------|-----------|-----------|
| 0             | 6             | 0           | 0.901526  | 0.684223  | 4.710762  |
| 1             | 6             | 0           | 2.980503  | 2.112956  | 3.298678  |
| 2             | 6             | 0           | 2.407808  | 3.112088  | 0.629844  |
| 3             | 6             | 0           | 2.387537  | 0.956846  | -1.357383 |
| 4             | 6             | 0           | 0.18847   | -1.03739  | -1.343121 |
| 5             | 6             | 0           | -1.429306 | -1.421526 | 1.022514  |
| 6             | 6             | 0           | 0.053835  | -1.822346 | 3.51384   |
| 7             | 6             | 0           | 2.435524  | 1.970272  | -4.118798 |
| 8             | 6             | 0           | 0.643499  | 0.269379  | -5.640296 |
| 9             | 6             | 0           | -1.384381 | -0.462208 | -3.723838 |
| 10            | 6             | 0           | -3.117222 | -2.585198 | -4.613392 |
| 11            | 8             | 0           | -0.487445 | 1.472822  | -7.76175  |
| 12            | 6             | 0           | 0.067909  | 4.823885  | 0.60342   |
| 13            | 8             | 0           | 4.597859  | 4.655818  | 0.108285  |
| 14            | 6             | 0           | -1.51992  | -3.434154 | 5.297995  |
| 15            | 6             | 0           | -1.120506 | -6.258325 | 5.090251  |
| 16            | 6             | 0           | -3.177091 | -2.494408 | 6.952474  |
| 17            | 8             | 0           | -1.391243 | -7.232012 | 2.583412  |
| 18            | 1             | 0           | 1.114269  | -2.871388 | -1.695419 |
| 19            | 1             | 0           | 4.161657  | -0.04846  | -1.006512 |
| 20            | 1             | 0           | 1.779434  | -2.903345 | 3.058977  |
| 21            | 1             | 0           | -0.750773 | 1.913057  | 4.951345  |
| 22            | 1             | 0           | 1.60032   | 0.293527  | 6.621782  |
| 23            | 1             | 0           | 4.675986  | 0.92357   | 3.16815   |
| 24            | 1             | 0           | 3.523816  | 3.761974  | 4.428972  |
| 25            | 1             | 0           | -2.607098 | -3.087009 | 0.690045  |
| 26            | 1             | 0           | -2.752524 | 0.148767  | 1.294256  |
| 27            | 1             | 0           | 4.35015   | 2.035913  | -4.902069 |
| 28            | 1             | 0           | 1.649039  | 3.884901  | -4.241878 |
| 29            | 1             | 0           | 1.639031  | -1.459995 | -6.246996 |
| 30            | 1             | 0           | -2.519496 | 1.246237  | -3.377043 |
| 31            | 1             | 0           | -4.63969  | -2.955817 | -3.262465 |
| 32            | 1             | 0           | -3.972737 | -2.092853 | -6.430919 |
| 33            | 1             | 0           | -2.049869 | -4.347281 | -4.861744 |
| 34            | 1             | 0           | 0.821747  | 1.756119  | -9.010655 |
| 35            | 1             | 0           | -0.189447 | 5.715053  | -1.247015 |
| 36            | 1             | 0           | 0.317674  | 6.332425  | 1.996968  |
| 37            | 1             | 0           | -1.674547 | 3.812179  | 1.045287  |
| 38            | 1             | 0           | 4.343519  | 5.418752  | -1.538634 |
| 39            | 1             | 0           | 0.768036  | -6.736333 | 5.834828  |
| 40            | 1             | 0           | -2.511505 | -7.267601 | 6.23699   |
| 41            | 1             | 0           | -4.325723 | -3.729322 | 8.125684  |
| 42            | 1             | 0           | -3.45341  | -0.478475 | 7.217053  |
| 43            | 1             | 0           | 0.052532  | -6.665741 | 1.608873  |

**7\_C**

Standard Orientation (A.U.)

| Center number | Atomic number | Atomic Type | X        | Y        | Z        |
|---------------|---------------|-------------|----------|----------|----------|
| 0             | 6             | 0           | 1.188632 | 0.466549 | 4.032789 |

|    |   |   |           |           |           |
|----|---|---|-----------|-----------|-----------|
| 1  | 6 | 0 | 2.110019  | 2.48218   | 2.164602  |
| 2  | 6 | 0 | 3.508282  | 1.510683  | -0.206475 |
| 3  | 6 | 0 | 1.708811  | 0.77492   | -2.387599 |
| 4  | 6 | 0 | -0.355318 | -1.257707 | -1.907106 |
| 5  | 6 | 0 | -1.901573 | -1.053258 | 0.553769  |
| 6  | 6 | 0 | -0.38941  | -1.75191  | 2.927061  |
| 7  | 6 | 0 | 0.272589  | 3.013062  | -3.620959 |
| 8  | 6 | 0 | -2.243564 | 1.950156  | -4.634531 |
| 9  | 6 | 0 | -2.070601 | -0.943742 | -4.258511 |
| 10 | 6 | 0 | -1.00682  | -2.254224 | -6.614703 |
| 11 | 8 | 0 | -4.220715 | 3.074161  | -3.163933 |
| 12 | 6 | 0 | 5.356119  | 3.535489  | -1.133679 |
| 13 | 8 | 0 | 5.108837  | -0.597598 | 0.414477  |
| 14 | 6 | 0 | -1.947796 | -2.906227 | 5.041542  |
| 15 | 6 | 0 | -0.436194 | -4.131217 | 7.131123  |
| 16 | 6 | 0 | -4.46204  | -2.781036 | 5.213686  |
| 17 | 8 | 0 | 1.438871  | -5.74235  | 6.044625  |
| 18 | 1 | 0 | 0.507987  | -3.147074 | -1.922539 |
| 19 | 1 | 0 | 2.970324  | -0.025209 | -3.824031 |
| 20 | 1 | 0 | 0.931684  | -3.258699 | 2.380788  |
| 21 | 1 | 0 | 0.040094  | 1.436742  | 5.460596  |
| 22 | 1 | 0 | 2.822213  | -0.324655 | 5.027441  |
| 23 | 1 | 0 | 3.387287  | 3.73757   | 3.208551  |
| 24 | 1 | 0 | 0.515963  | 3.660299  | 1.56745   |
| 25 | 1 | 0 | -3.467411 | -2.396158 | 0.362586  |
| 26 | 1 | 0 | -2.76792  | 0.817029  | 0.720776  |
| 27 | 1 | 0 | 1.397226  | 3.890479  | -5.116152 |
| 28 | 1 | 0 | -0.184553 | 4.49892   | -2.258761 |
| 29 | 1 | 0 | -2.530219 | 2.420178  | -6.640088 |
| 30 | 1 | 0 | -3.960838 | -1.721329 | -3.889323 |
| 31 | 1 | 0 | -0.780612 | -4.286298 | -6.290741 |
| 32 | 1 | 0 | -2.272241 | -2.003321 | -8.235714 |
| 33 | 1 | 0 | 0.843914  | -1.496561 | -7.151181 |
| 34 | 1 | 0 | -5.795594 | 2.279369  | -3.662497 |
| 35 | 1 | 0 | 6.829782  | 3.816009  | 0.289858  |
| 36 | 1 | 0 | 4.396223  | 5.339467  | -1.450474 |
| 37 | 1 | 0 | 6.263919  | 2.9458    | -2.897474 |
| 38 | 1 | 0 | 4.033911  | -2.003168 | 0.88662   |
| 39 | 1 | 0 | 0.474089  | -2.648546 | 8.27663   |
| 40 | 1 | 0 | -1.70726  | -5.194353 | 8.385584  |
| 41 | 1 | 0 | -5.465167 | -3.637167 | 6.789098  |
| 42 | 1 | 0 | -5.614626 | -1.809893 | 3.823294  |
| 43 | 1 | 0 | 2.603633  | -6.216426 | 7.374293  |

7\_d

Standard Orientation (A.U.)

| Center number | Atomic number | Atomic Type | X         | Y         | Z         |
|---------------|---------------|-------------|-----------|-----------|-----------|
| 0             | 6             | 0           | 3.032459  | -0.451013 | 3.169789  |
| 1             | 6             | 0           | 3.425818  | 1.96585   | 1.614134  |
| 2             | 6             | 0           | 3.649107  | 1.672321  | -1.282495 |
| 3             | 6             | 0           | 1.074462  | 1.548024  | -2.655986 |
| 4             | 6             | 0           | -0.7922   | -0.598178 | -1.942145 |
| 5             | 6             | 0           | -1.307966 | -0.952685 | 0.899251  |
| 6             | 6             | 0           | 0.867065  | -2.248048 | 2.361751  |
| 7             | 6             | 0           | -0.570873 | 3.947965  | -2.518406 |
| 8             | 6             | 0           | -3.288847 | 3.122725  | -3.239973 |
| 9             | 6             | 0           | -3.217756 | 0.185596  | -3.386792 |
| 10            | 6             | 0           | -3.222442 | -0.756497 | -6.126709 |
| 11            | 8             | 0           | -5.160903 | 4.069491  | -1.547761 |
| 12            | 6             | 0           | 5.200358  | 3.870395  | -2.345521 |
| 13            | 8             | 0           | 5.110755  | -0.536854 | -1.902198 |
| 14            | 6             | 0           | -0.202016 | -3.740675 | 4.577315  |
| 15            | 6             | 0           | -0.461363 | -6.548171 | 4.097253  |
| 16            | 6             | 0           | -0.976845 | -2.697166 | 6.737883  |
| 17            | 8             | 0           | -1.375921 | -7.983566 | 6.156911  |
| 18            | 1             | 0           | -0.109527 | -2.422907 | -2.665258 |
| 19            | 1             | 0           | 1.571179  | 1.241091  | -4.646408 |
| 20            | 1             | 0           | 1.666686  | -3.653185 | 1.048048  |
| 21            | 1             | 0           | 2.715228  | 0.140042  | 5.125206  |
| 22            | 1             | 0           | 4.797297  | -1.532808 | 3.186471  |
| 23            | 1             | 0           | 5.173282  | 2.838635  | 2.306687  |
| 24            | 1             | 0           | 1.919886  | 3.323057  | 2.036783  |

|    |   |   |           |           |           |
|----|---|---|-----------|-----------|-----------|
| 25 | 1 | 0 | -3.001853 | -2.132271 | 1.081915  |
| 26 | 1 | 0 | -1.774857 | 0.845857  | 1.824929  |
| 27 | 1 | 0 | 0.138912  | 5.458965  | -3.736185 |
| 28 | 1 | 0 | -0.623853 | 4.722826  | -0.597703 |
| 29 | 1 | 0 | -3.839238 | 3.91138   | -5.06981  |
| 30 | 1 | 0 | -4.910625 | -0.558214 | -2.45079  |
| 31 | 1 | 0 | -3.155633 | -2.824838 | -6.204736 |
| 32 | 1 | 0 | -4.93457  | -0.135123 | -7.111478 |
| 33 | 1 | 0 | -1.595326 | -0.035162 | -7.187012 |
| 34 | 1 | 0 | -4.821799 | 3.347741  | 0.103289  |
| 35 | 1 | 0 | 4.41496   | 5.691041  | -1.757957 |
| 36 | 1 | 0 | 5.247492  | 3.802811  | -4.412877 |
| 37 | 1 | 0 | 7.142539  | 3.736792  | -1.647862 |
| 38 | 1 | 0 | 4.078953  | -2.005606 | -1.541907 |
| 39 | 1 | 0 | -1.803662 | -6.869686 | 2.54682   |
| 40 | 1 | 0 | 1.376739  | -7.276462 | 3.424596  |
| 41 | 1 | 0 | -1.872932 | -3.829978 | 8.193709  |
| 42 | 1 | 0 | -0.795261 | -0.686844 | 7.110147  |
| 43 | 1 | 0 | -0.184031 | -7.765809 | 7.533478  |

**7\_e**

Standard Orientation (A.U.)

| Center number | Atomic number | Atomic Type | X         | Y         | Z         |
|---------------|---------------|-------------|-----------|-----------|-----------|
| 0             | 6             | 0           | 0.411193  | 0.450463  | 4.289338  |
| 1             | 6             | 0           | 1.067646  | 2.831003  | 2.768396  |
| 2             | 6             | 0           | 3.033755  | 2.528229  | 0.631463  |
| 3             | 6             | 0           | 1.893124  | 1.58212   | -1.885892 |
| 4             | 6             | 0           | 0.484887  | -0.98756  | -1.916137 |
| 5             | 6             | 0           | -1.515392 | -1.389158 | 0.16301   |
| 6             | 6             | 0           | -0.376757 | -1.947986 | 2.775683  |
| 7             | 6             | 0           | 0.039403  | 3.406205  | -3.21015  |
| 8             | 6             | 0           | -1.564096 | 1.778051  | -5.049652 |
| 9             | 6             | 0           | -0.719615 | -0.998129 | -4.585498 |
| 10            | 6             | 0           | 1.121328  | -1.918337 | -6.625253 |
| 11            | 8             | 0           | -4.217816 | 2.152793  | -4.741882 |
| 12            | 6             | 0           | 4.36104   | 5.060753  | 0.191631  |
| 13            | 8             | 0           | 5.032048  | 0.857739  | 1.40799   |
| 14            | 6             | 0           | -2.027563 | -3.58481  | 4.458934  |
| 15            | 6             | 0           | -0.644901 | -4.939549 | 6.562554  |
| 16            | 6             | 0           | -4.526663 | -3.840271 | 4.204964  |
| 17            | 8             | 0           | 1.340902  | -6.515968 | 5.632559  |
| 18            | 1             | 0           | 1.840839  | -2.552797 | -1.75391  |
| 19            | 1             | 0           | 3.535834  | 1.349523  | -3.129494 |
| 20            | 1             | 0           | 1.334542  | -3.07981  | 2.444869  |
| 21            | 1             | 0           | -1.142264 | 0.953219  | 5.565801  |
| 22            | 1             | 0           | 2.02378   | -0.029236 | 5.49336   |
| 23            | 1             | 0           | 1.795238  | 4.219541  | 4.124184  |
| 24            | 1             | 0           | -0.657725 | 3.666862  | 1.985441  |
| 25            | 1             | 0           | -2.670419 | -3.010251 | -0.407858 |
| 26            | 1             | 0           | -2.811854 | 0.229271  | 0.280299  |
| 27            | 1             | 0           | 1.025464  | 4.941381  | -4.180157 |
| 28            | 1             | 0           | -1.248941 | 4.304382  | -1.859651 |
| 29            | 1             | 0           | -1.220686 | 2.313597  | -7.016226 |
| 30            | 1             | 0           | -2.397853 | -2.212841 | -4.639334 |
| 31            | 1             | 0           | 2.815562  | -0.730867 | -6.726308 |
| 32            | 1             | 0           | 1.738758  | -3.859046 | -6.24987  |
| 33            | 1             | 0           | 0.223288  | -1.882938 | -8.490677 |
| 34            | 1             | 0           | -4.647908 | 1.643149  | -3.034258 |
| 35            | 1             | 0           | 2.99322   | 6.569682  | -0.168053 |
| 36            | 1             | 0           | 5.655741  | 4.939306  | -1.417667 |
| 37            | 1             | 0           | 5.460594  | 5.555933  | 1.871521  |
| 38            | 1             | 0           | 4.341933  | -0.834975 | 1.518306  |
| 39            | 1             | 0           | 0.298316  | -3.584814 | 7.811667  |
| 40            | 1             | 0           | -1.990089 | -6.023716 | 7.717774  |
| 41            | 1             | 0           | -5.61246  | -5.00966  | 5.499477  |
| 42            | 1             | 0           | -5.593077 | -2.886708 | 2.733946  |
| 43            | 1             | 0           | 0.560837  | -7.744064 | 4.51554   |

**7\_f**

Standard Orientation (A.U.)

| Center number | Atomic number | Atomic Type | X         | Y        | Z        |
|---------------|---------------|-------------|-----------|----------|----------|
| 0             | 6             | 0           | -0.053564 | 0.844798 | 2.994473 |
| 1             | 6             | 0           | 2.288205  | 2.494633 | 2.578635 |



|    |   |   |           |           |           |
|----|---|---|-----------|-----------|-----------|
| 2  | 6 | 0 | 3.678671  | 2.363855  | 0.01148   |
| 3  | 6 | 0 | 2.076433  | 1.478926  | -2.262252 |
| 4  | 6 | 0 | 0.869886  | -1.249944 | -2.173501 |
| 5  | 6 | 0 | 1.395833  | -2.895212 | 0.158631  |
| 6  | 6 | 0 | 0.301723  | -2.020074 | 2.750876  |
| 7  | 6 | 0 | -0.103903 | 3.270411  | -3.01423  |
| 8  | 6 | 0 | -1.974433 | 1.568807  | -4.402306 |
| 9  | 6 | 0 | -1.948905 | -0.88863  | -2.858555 |
| 10 | 6 | 0 | -3.144676 | -3.152658 | -4.182079 |
| 11 | 8 | 0 | -4.373418 | 2.772512  | -4.542522 |
| 12 | 6 | 0 | 4.848202  | 4.960306  | -0.561143 |
| 13 | 8 | 0 | 5.734962  | 0.607286  | 0.396574  |
| 14 | 6 | 0 | -2.077164 | -3.494353 | 3.418018  |
| 15 | 6 | 0 | -1.634485 | -6.202607 | 4.224403  |
| 16 | 6 | 0 | -4.426787 | -2.563215 | 3.446551  |
| 17 | 8 | 0 | -0.169822 | -6.348299 | 6.489204  |
| 18 | 1 | 0 | 1.725311  | -2.293481 | -3.753064 |
| 19 | 1 | 0 | 3.415245  | 1.469566  | -3.854189 |
| 20 | 1 | 0 | 1.699527  | -2.584883 | 4.176034  |
| 21 | 1 | 0 | -1.549526 | 1.486141  | 1.724294  |
| 22 | 1 | 0 | -0.755819 | 1.23623   | 4.906362  |
| 23 | 1 | 0 | 3.716751  | 2.075271  | 4.018703  |
| 24 | 1 | 0 | 1.704206  | 4.456743  | 2.898129  |
| 25 | 1 | 0 | 3.440587  | -3.057528 | 0.349902  |
| 26 | 1 | 0 | 0.6938    | -4.800054 | -0.259641 |
| 27 | 1 | 0 | 0.520795  | 4.866704  | -4.168288 |
| 28 | 1 | 0 | -1.060085 | 4.051448  | -1.35147  |
| 29 | 1 | 0 | -1.25498  | 1.173781  | -6.322971 |
| 30 | 1 | 0 | -3.043587 | -0.50235  | -1.148672 |
| 31 | 1 | 0 | -3.12868  | -4.825737 | -2.963812 |
| 32 | 1 | 0 | -5.126903 | -2.781006 | -4.670513 |
| 33 | 1 | 0 | -2.131624 | -3.621751 | -5.930531 |
| 34 | 1 | 0 | -5.498445 | 1.651836  | -5.456626 |
| 35 | 1 | 0 | 5.990849  | 4.885192  | -2.290786 |
| 36 | 1 | 0 | 6.082815  | 5.523543  | 1.000317  |
| 37 | 1 | 0 | 3.404071  | 6.419031  | -0.817042 |
| 38 | 1 | 0 | 6.627818  | 0.466757  | -1.200471 |
| 39 | 1 | 0 | -3.452437 | -7.188233 | 4.441174  |
| 40 | 1 | 0 | -0.526043 | -7.235603 | 2.815083  |
| 41 | 1 | 0 | -6.026953 | -3.748757 | 3.955072  |
| 42 | 1 | 0 | -4.864786 | -0.617776 | 2.967031  |
| 43 | 1 | 0 | -1.063419 | -5.363819 | 7.752824  |

**7\_g**

Standard Orientation (A.U.)

| Center number | Atomic number | Atomic Type | X         | Y         | Z         |
|---------------|---------------|-------------|-----------|-----------|-----------|
| 0             | 6             | 0           | -0.188022 | 1.121713  | 2.975795  |
| 1             | 6             | 0           | 2.238167  | 2.657747  | 2.608672  |
| 2             | 6             | 0           | 3.76109   | 2.338251  | 0.135021  |
| 3             | 6             | 0           | 2.246659  | 1.403689  | -2.178531 |
| 4             | 6             | 0           | 0.916668  | -1.264429 | -2.02517  |
| 5             | 6             | 0           | 1.24717   | -2.811217 | 0.407867  |
| 6             | 6             | 0           | 0.069542  | -1.762423 | 2.897683  |
| 7             | 6             | 0           | 0.182024  | 3.237107  | -3.130995 |
| 8             | 6             | 0           | -1.693799 | 1.530342  | -4.535817 |
| 9             | 6             | 0           | -1.844764 | -0.8351   | -2.884204 |
| 10            | 6             | 0           | -3.065304 | -3.105071 | -4.171835 |
| 11            | 8             | 0           | -4.15283  | 2.575674  | -4.837863 |
| 12            | 6             | 0           | 5.074765  | 4.851171  | -0.496915 |
| 13            | 8             | 0           | 5.715683  | 0.521272  | 0.718856  |
| 14            | 6             | 0           | -2.394727 | -3.105045 | 3.536715  |
| 15            | 6             | 0           | -2.109293 | -5.800437 | 4.43048   |
| 16            | 6             | 0           | -4.700066 | -2.087201 | 3.384233  |
| 17            | 8             | 0           | -0.582455 | -5.81457  | 6.659935  |
| 18            | 1             | 0           | 1.808623  | -2.419023 | -3.504282 |
| 19            | 1             | 0           | 3.665194  | 1.261131  | -3.69347  |
| 20            | 1             | 0           | 1.377278  | -2.292618 | 4.415865  |
| 21            | 1             | 0           | -1.588863 | 1.751349  | 1.595757  |
| 22            | 1             | 0           | -0.971816 | 1.633761  | 4.825399  |
| 23            | 1             | 0           | 3.567045  | 2.261212  | 4.147276  |
| 24            | 1             | 0           | 1.720014  | 4.655563  | 2.794493  |
| 25            | 1             | 0           | 3.270305  | -3.058741 | 0.710376  |

|    |   |   |           |           |           |
|----|---|---|-----------|-----------|-----------|
| 26 | 1 | 0 | 0.474699  | -4.698615 | 0.037987  |
| 27 | 1 | 0 | 0.945317  | -4.75045  | -4.320676 |
| 28 | 1 | 0 | -0.820999 | 4.133986  | -1.557197 |
| 29 | 1 | 0 | -0.899982 | 1.012188  | -6.396096 |
| 30 | 1 | 0 | -3.016721 | -0.325194 | -1.259491 |
| 31 | 1 | 0 | -3.227478 | -4.703568 | -2.865962 |
| 32 | 1 | 0 | -4.965879 | -2.623926 | -4.832393 |
| 33 | 1 | 0 | -1.949203 | -3.723934 | -5.807945 |
| 34 | 1 | 0 | -4.016997 | 4.006786  | -5.972714 |
| 35 | 1 | 0 | 6.30465   | 4.641137  | -2.154435 |
| 36 | 1 | 0 | 6.24755   | 5.440353  | 1.102134  |
| 37 | 1 | 0 | 3.713548  | 6.355499  | -0.901995 |
| 38 | 1 | 0 | 6.677032  | 0.255026  | -0.821392 |
| 39 | 1 | 0 | -3.982813 | -6.620563 | 4.802038  |
| 40 | 1 | 0 | -1.211382 | -6.947984 | 2.942523  |
| 41 | 1 | 0 | -6.370745 | -3.164441 | 3.9014    |
| 42 | 1 | 0 | -5.029483 | -0.165253 | 2.750287  |
| 43 | 1 | 0 | -0.023595 | -7.535264 | 6.938829  |

# 7\_h

Standard Orientation (A.U.)

| Center number | Atomic number | Atomic Type | X         | Y         | Z         |
|---------------|---------------|-------------|-----------|-----------|-----------|
| 0             | 6             | 0           | 0.710083  | 0.499388  | 4.78846   |
| 1             | 6             | 0           | 2.681608  | 2.157548  | 3.477417  |
| 2             | 6             | 0           | 2.030259  | 3.289339  | 0.880748  |
| 3             | 6             | 0           | 2.210322  | 1.290479  | -1.255638 |
| 4             | 6             | 0           | 0.255287  | -0.950997 | -1.356256 |
| 5             | 6             | 0           | -1.375331 | -1.591837 | 0.944787  |
| 6             | 6             | 0           | 0.073593  | -1.999124 | 3.454053  |
| 7             | 6             | 0           | 2.11659   | 2.480141  | -3.939792 |
| 8             | 6             | 0           | 0.641587  | 0.608858  | -5.592512 |
| 9             | 6             | 0           | -1.31524  | -0.497266 | -3.764956 |
| 10            | 6             | 0           | -2.70639  | -2.794778 | -4.804933 |
| 11            | 8             | 0           | -0.363617 | 1.647255  | -7.852003 |
| 12            | 6             | 0           | -0.454188 | 4.783876  | 0.956307  |
| 13            | 8             | 0           | 4.070746  | 5.058799  | 0.491797  |
| 14            | 6             | 0           | -1.421012 | -3.802197 | 5.120187  |
| 15            | 6             | 0           | -0.810804 | -6.577814 | 4.801016  |
| 16            | 6             | 0           | -3.185434 | -3.062328 | 6.765412  |
| 17            | 8             | 0           | -0.951723 | -7.452881 | 2.247493  |
| 18            | 1             | 0           | 1.394123  | -2.654876 | -1.729859 |
| 19            | 1             | 0           | 4.090877  | 0.468465  | -0.992331 |
| 20            | 1             | 0           | 1.883035  | -2.931082 | 2.995155  |
| 21            | 1             | 0           | -1.03474  | 1.582498  | 5.071503  |
| 22            | 1             | 0           | 1.420044  | 0.063731  | 6.685552  |
| 23            | 1             | 0           | 4.456857  | 1.102778  | 3.27389   |
| 24            | 1             | 0           | 3.108875  | 3.764539  | 4.713002  |
| 25            | 1             | 0           | -2.393933 | -3.333724 | 0.496469  |
| 26            | 1             | 0           | -2.837673 | -0.158234 | 1.257237  |
| 27            | 1             | 0           | 3.988945  | 2.906206  | -4.703927 |
| 28            | 1             | 0           | 1.043722  | 4.259923  | -3.930664 |
| 29            | 1             | 0           | 1.894112  | -0.913923 | -6.23503  |
| 30            | 1             | 0           | -2.700048 | 1.01158   | -3.361774 |
| 31            | 1             | 0           | -1.398233 | -4.383632 | -5.063648 |
| 32            | 1             | 0           | -4.223479 | -3.423141 | -3.546702 |
| 33            | 1             | 0           | -3.533164 | -2.351333 | -6.649336 |
| 34            | 1             | 0           | -1.536786 | 2.971362  | -7.363524 |
| 35            | 1             | 0           | -0.37244  | 6.161182  | 2.497821  |
| 36            | 1             | 0           | -2.109843 | 3.586107  | 1.240569  |
| 37            | 1             | 0           | -0.745896 | 5.840114  | -0.800361 |
| 38            | 1             | 0           | 3.798452  | 5.858433  | -1.134862 |
| 39            | 1             | 0           | 1.089246  | -6.952703 | 5.574006  |
| 40            | 1             | 0           | -2.1514   | -7.734352 | 5.865784  |
| 41            | 1             | 0           | -4.268502 | -4.430259 | 7.850085  |
| 42            | 1             | 0           | -3.617864 | -1.086466 | 7.110276  |
| 43            | 1             | 0           | 0.486268  | -6.766533 | 1.344474  |

# 7\_i

Standard Orientation (A.U.)

| Center number | Atomic number | Atomic Type | X         | Y        | Z        |
|---------------|---------------|-------------|-----------|----------|----------|
| 0             | 6             | 0           | -0.026912 | 0.111227 | 4.281932 |
| 1             | 6             | 0           | 2.20936   | 1.677209 | 3.323078 |
| 2             | 6             | 0           | 2.127352  | 2.69206  | 0.598924 |

|    |   |   |           |           |           |
|----|---|---|-----------|-----------|-----------|
| 3  | 6 | 0 | 2.362553  | 0.4705    | -1.316778 |
| 4  | 6 | 0 | -0.013712 | -1.15289  | -1.89258  |
| 5  | 6 | 0 | -1.867452 | -1.79068  | 0.245141  |
| 6  | 6 | 0 | -0.650024 | -2.349659 | 2.824564  |
| 7  | 6 | 0 | 3.210407  | 1.202856  | -4.015043 |
| 8  | 6 | 0 | 0.830557  | 1.49874   | -5.646817 |
| 9  | 6 | 0 | -1.312776 | 0.128105  | -4.182941 |
| 10 | 6 | 0 | -2.854103 | -1.696305 | -5.809644 |
| 11 | 8 | 0 | 0.362283  | 4.14691   | -5.984141 |
| 12 | 6 | 0 | -0.120929 | 4.470089  | 0.18834   |
| 13 | 8 | 0 | 4.416148  | 4.166083  | 0.458325  |
| 14 | 6 | 0 | -2.270483 | -4.030903 | 4.497688  |
| 15 | 6 | 0 | -0.874875 | -5.570864 | 6.467888  |
| 16 | 6 | 0 | -4.789828 | -4.114435 | 4.37774   |
| 17 | 8 | 0 | 1.007468  | -7.198613 | 5.419302  |
| 18 | 1 | 0 | 0.744531  | -2.965547 | -2.578106 |
| 19 | 1 | 0 | 3.826951  | -0.743178 | -0.498134 |
| 20 | 1 | 0 | 1.12632   | -3.372532 | 2.476764  |
| 21 | 1 | 0 | -1.751173 | 1.262789  | 4.333486  |
| 22 | 1 | 0 | 0.379994  | -0.360204 | 6.259616  |
| 23 | 1 | 0 | 3.956792  | 0.573388  | 3.511115  |
| 24 | 1 | 0 | 2.434742  | 3.32078   | 4.564399  |
| 25 | 1 | 0 | -2.965698 | -3.442516 | -0.345553 |
| 26 | 1 | 0 | -3.241069 | -0.253798 | 0.473477  |
| 27 | 1 | 0 | 4.349103  | -0.350701 | -4.775761 |
| 28 | 1 | 0 | 4.394775  | 2.890631  | -4.117708 |
| 29 | 1 | 0 | 1.109768  | 0.631155  | -7.515738 |
| 30 | 1 | 0 | -2.580839 | 1.602535  | -3.462574 |
| 31 | 1 | 0 | -1.646928 | -3.193913 | -6.58336  |
| 32 | 1 | 0 | -4.359857 | -2.603852 | -4.716509 |
| 33 | 1 | 0 | -3.74532  | -0.721365 | -7.407827 |
| 34 | 1 | 0 | -1.245396 | 4.318994  | -6.848264 |
| 35 | 1 | 0 | -1.935248 | 3.524318  | 0.468614  |
| 36 | 1 | 0 | -0.104525 | 5.24228   | -1.730078 |
| 37 | 1 | 0 | 0.003738  | 6.029853  | 1.543232  |
| 38 | 1 | 0 | 4.294442  | 5.204039  | -1.046699 |
| 39 | 1 | 0 | -0.022739 | -4.314407 | 7.893847  |
| 40 | 1 | 0 | -2.206537 | -6.801495 | 7.459221  |
| 41 | 1 | 0 | -5.878656 | -5.313341 | 5.641874  |
| 42 | 1 | 0 | -5.868278 | -2.998544 | 3.035059  |
| 43 | 1 | 0 | 2.503798  | -6.194199 | 5.104963  |

7\_j

Standard Orientation (A.U.)

| Center number | Atomic number | Atomic Type | X         | Y         | Z         |
|---------------|---------------|-------------|-----------|-----------|-----------|
| 0             | 6             | 0           | 3.056426  | -0.283504 | 3.33907   |
| 1             | 6             | 0           | 3.34018   | 2.132184  | 1.756221  |
| 2             | 6             | 0           | 3.619245  | 1.819279  | -1.132774 |
| 3             | 6             | 0           | 1.074185  | 1.530903  | -2.535521 |
| 4             | 6             | 0           | -0.66651  | -0.719453 | -1.828928 |
| 5             | 6             | 0           | -1.209353 | -1.077467 | 1.006521  |
| 6             | 6             | 0           | 1.013982  | -2.215071 | 2.526677  |
| 7             | 6             | 0           | -0.7196   | 3.820017  | -2.434525 |
| 8             | 6             | 0           | -3.33662  | 2.829266  | -3.292878 |
| 9             | 6             | 0           | -3.1138   | -0.106896 | -3.320973 |
| 10            | 6             | 0           | -3.052087 | -1.160726 | -6.01846  |
| 11            | 8             | 0           | -5.364859 | 3.744262  | -1.773718 |
| 12            | 6             | 0           | 5.055579  | 4.089904  | -2.204555 |
| 13            | 8             | 0           | 5.212229  | -0.30928  | -1.709255 |
| 14            | 6             | 0           | -0.009216 | -3.744122 | 4.74131   |
| 15            | 6             | 0           | -0.253622 | -6.52629  | 4.188935  |
| 16            | 6             | 0           | -0.761824 | -2.756698 | 6.932933  |
| 17            | 8             | 0           | -1.469631 | -7.80712  | 6.198336  |
| 18            | 1             | 0           | 0.143933  | -2.50377  | -2.520452 |
| 19            | 1             | 0           | 1.609119  | 1.243194  | -4.519756 |
| 20            | 1             | 0           | 1.918694  | -3.587951 | 1.245505  |
| 21            | 1             | 0           | 2.679069  | 0.317808  | 5.279889  |
| 22            | 1             | 0           | 4.87942   | -1.262507 | 3.401469  |
| 23            | 1             | 0           | 5.028506  | 3.10608   | 2.460599  |
| 24            | 1             | 0           | 1.758029  | 3.411655  | 2.141489  |
| 25            | 1             | 0           | -2.825479 | -2.364497 | 1.170137  |
| 26            | 1             | 0           | -1.814906 | 0.694771  | 1.90166   |

|    |   |   |           |           |           |
|----|---|---|-----------|-----------|-----------|
| 27 | 1 | 0 | -0.060946 | 5.400552  | -3.591026 |
| 28 | 1 | 0 | -0.905213 | 4.54604   | -0.502316 |
| 29 | 1 | 0 | -3.794366 | 3.517527  | -5.187992 |
| 30 | 1 | 0 | -4.775701 | -0.893963 | -2.364567 |
| 31 | 1 | 0 | -2.91804  | -3.227444 | -6.009847 |
| 32 | 1 | 0 | -4.768338 | -0.636222 | -7.051611 |
| 33 | 1 | 0 | -1.431791 | -0.431421 | -7.084644 |
| 34 | 1 | 0 | -5.084125 | 3.136637  | -0.066337 |
| 35 | 1 | 0 | 4.158904  | 5.868983  | -1.650082 |
| 36 | 1 | 0 | 5.133435  | 4.000594  | -4.270261 |
| 37 | 1 | 0 | 6.992813  | 4.077118  | -1.481203 |
| 38 | 1 | 0 | 4.283771  | -1.827966 | -1.281263 |
| 39 | 1 | 0 | -1.303826 | -6.761644 | 2.397348  |
| 40 | 1 | 0 | 1.657477  | -7.296626 | 3.844457  |
| 41 | 1 | 0 | -1.569297 | -3.943112 | 8.393927  |
| 42 | 1 | 0 | -0.606141 | -0.748949 | 7.330612  |
| 43 | 1 | 0 | -1.467325 | -9.593765 | 5.805641  |

**7\_k**

Standard Orientation (A.U.)

| Center number | Atomic number | Atomic Type | X         | Y         | Z         |
|---------------|---------------|-------------|-----------|-----------|-----------|
| 0             | 6             | 0           | 2.223233  | -0.982448 | 3.604622  |
| 1             | 6             | 0           | 1.979974  | 1.84758   | 2.992572  |
| 2             | 6             | 0           | 3.15061   | 2.574691  | 0.420719  |
| 3             | 6             | 0           | 1.796275  | 1.472346  | -1.910458 |
| 4             | 6             | 0           | 0.834856  | -1.30328  | -1.879457 |
| 5             | 6             | 0           | -1.114396 | -1.899054 | 0.204999  |
| 6             | 6             | 0           | -0.046242 | -2.610823 | 2.831894  |
| 7             | 6             | 0           | -0.50434  | 2.943203  | -2.918519 |
| 8             | 6             | 0           | -1.789784 | 1.139747  | -4.843548 |
| 9             | 6             | 0           | -0.459837 | -1.469946 | -4.505066 |
| 10            | 6             | 0           | 1.396544  | -2.036586 | -6.655617 |
| 11            | 8             | 0           | -4.468543 | 1.030093  | -4.56531  |
| 12            | 6             | 0           | 3.34539   | 5.461029  | 0.214981  |
| 13            | 8             | 0           | 5.668385  | 1.53705   | 0.248465  |
| 14            | 6             | 0           | -2.191765 | -2.642846 | 4.74415   |
| 15            | 6             | 0           | -4.311352 | -4.493204 | 4.211155  |
| 16            | 6             | 0           | -2.329144 | -1.162104 | 6.786545  |
| 17            | 8             | 0           | -3.429675 | -6.977825 | 3.643621  |
| 18            | 1             | 0           | 2.412748  | -2.637882 | -1.73995  |
| 19            | 1             | 0           | 3.25628   | 1.556866  | -3.378702 |
| 20            | 1             | 0           | 0.617927  | -4.571062 | 2.675225  |
| 21            | 1             | 0           | 2.582076  | -1.25201  | 5.625301  |
| 22            | 1             | 0           | 3.906922  | -1.679829 | 2.630225  |
| 23            | 1             | 0           | 2.963701  | 2.95713   | 4.448317  |
| 24            | 1             | 0           | 0.00491   | 2.471873  | 3.059236  |
| 25            | 1             | 0           | -2.285541 | -3.479804 | -0.438067 |
| 26            | 1             | 0           | -2.400674 | -0.287015 | 0.440559  |
| 27            | 1             | 0           | 0.019402  | 4.747533  | -3.777107 |
| 28            | 1             | 0           | -1.854116 | 3.383305  | -1.407755 |
| 29            | 1             | 0           | -1.522505 | 1.825929  | -6.775345 |
| 30            | 1             | 0           | -1.913816 | -2.945696 | -4.520497 |
| 31            | 1             | 0           | 0.404845  | -2.111    | -8.472457 |
| 32            | 1             | 0           | 2.870738  | -0.590303 | -6.80939  |
| 33            | 1             | 0           | 2.335596  | -3.858898 | -6.363437 |
| 34            | 1             | 0           | -4.812069 | 0.32384   | -2.909112 |
| 35            | 1             | 0           | 4.578865  | 6.194755  | 1.712048  |
| 36            | 1             | 0           | 1.500059  | 6.373391  | 0.420727  |
| 37            | 1             | 0           | 4.156339  | 6.008936  | -1.60731  |
| 38            | 1             | 0           | 6.610655  | 2.155932  | 1.696832  |
| 39            | 1             | 0           | -5.646454 | -4.511604 | 5.804483  |
| 40            | 1             | 0           | -5.375806 | -3.919626 | 2.530869  |
| 41            | 1             | 0           | -3.918447 | -1.293005 | 8.082988  |
| 42            | 1             | 0           | -0.904863 | 0.239013  | 7.246193  |
| 43            | 1             | 0           | -2.456965 | -7.54359  | 5.09154   |

**7\_l**

Standard Orientation (A.U.)

| Center number | Atomic number | Atomic Type | X        | Y         | Z         |
|---------------|---------------|-------------|----------|-----------|-----------|
| 0             | 6             | 0           | 3.14743  | -2.759871 | 1.477411  |
| 1             | 6             | 0           | 2.141485 | -1.035948 | 3.579406  |
| 2             | 6             | 0           | 1.682416 | 1.787377  | 2.852203  |
| 3             | 6             | 0           | 1.480502 | 2.220921  | -0.033977 |

| 4                | 6                | 0              | -0.600071                   | 0.771827  | -1.495219 |
|------------------|------------------|----------------|-----------------------------|-----------|-----------|
| 5                | 6                | 0              | -1.194861                   | -1.916505 | -0.623377 |
| 6                | 6                | 0              | 1.116666                    | -3.698988 | -0.425517 |
| 7                | 6                | 0              | 0.99286                     | 5.00449   | -0.777615 |
| 8                | 6                | 0              | -1.830657                   | 5.238257  | -1.515332 |
| 9                | 6                | 0              | -2.921528                   | 2.53797   | -1.473108 |
| 10               | 6                | 0              | -4.844026                   | 2.035987  | -3.566386 |
| 11               | 8                | 0              | -3.298441                   | 6.743758  | 0.188413  |
| 12               | 6                | 0              | -0.544935                   | 2.810439  | 4.39878   |
| 13               | 8                | 0              | 3.920696                    | 3.226371  | 3.469108  |
| 14               | 6                | 0              | 0.153826                    | -6.35219  | 0.122851  |
| 15               | 6                | 0              | -0.681108                   | -7.849543 | -2.162996 |
| 16               | 6                | 0              | 0.00131                     | -7.375486 | 2.427355  |
| 17               | 8                | 0              | 1.339816                    | -8.239287 | -3.911841 |
| 18               | 1                | 0              | 0.069164                    | 0.65547   | -3.463337 |
| 19               | 1                | 0              | 3.333783                    | 1.66499   | -0.755155 |
| 20               | 1                | 0              | 1.991928                    | -3.786265 | -2.302835 |
| 21               | 1                | 0              | 4.057221                    | -4.408438 | 2.334622  |
| 22               | 1                | 0              | 4.649686                    | -1.766166 | 0.461392  |
| 23               | 1                | 0              | 3.501912                    | -1.021442 | 5.144127  |
| 24               | 1                | 0              | 0.401898                    | -1.845951 | 4.356488  |
| 25               | 1                | 0              | -2.560581                   | -2.743028 | -1.944579 |
| 26               | 1                | 0              | -2.160832                   | -1.863164 | 1.208453  |
| 27               | 1                | 0              | 2.175579                    | 5.484841  | -2.408222 |
| 28               | 1                | 0              | 1.508351                    | 6.311903  | 0.735912  |
| 29               | 1                | 0              | -1.997801                   | 6.035661  | -3.429951 |
| 30               | 1                | 0              | -3.881422                   | 2.343591  | 0.353211  |
| 31               | 1                | 0              | -5.673283                   | 0.145114  | -3.407942 |
| 32               | 1                | 0              | -6.388601                   | 3.4117    | -3.479182 |
| 33               | 1                | 0              | -3.958326                   | 2.182554  | -5.436406 |
| 34               | 1                | 0              | -2.668562                   | 8.461043  | 0.081608  |
| 35               | 1                | 0              | -0.966996                   | 4.779355  | 3.94965   |
| 36               | 1                | 0              | -0.1023                     | 2.667371  | 6.42285   |
| 37               | 1                | 0              | -2.262836                   | 1.707179  | 4.077075  |
| 38               | 1                | 0              | 4.061621                    | 3.243059  | 5.297341  |
| 39               | 1                | 0              | -1.520523                   | -9.656633 | -1.568492 |
| 40               | 1                | 0              | -2.117865                   | -6.819999 | -3.241646 |
| 41               | 1                | 0              | -0.750291                   | -9.267706 | 2.705804  |
| 42               | 1                | 0              | 0.599969                    | -6.381834 | 4.120459  |
| 43               | 1                | 0              | 2.6857                      | -9.06808  | -2.981045 |
| 7_m              |                  |                | Standard Orientation (A.U.) |           |           |
| Center<br>number | Atomic<br>number | Atomic<br>Type | X                           | Y         | Z         |
| 0                | 6                | 0              | 0.012381                    | 1.086088  | 2.900747  |
| 1                | 6                | 0              | 2.448947                    | 2.598039  | 2.503555  |
| 2                | 6                | 0              | 3.938327                    | 2.257616  | 0.013117  |
| 3                | 6                | 0              | 2.382089                    | 1.34906   | -2.282819 |
| 4                | 6                | 0              | 1.02014                     | -1.302292 | -2.119776 |
| 5                | 6                | 0              | 1.361234                    | -2.861805 | 0.303664  |
| 6                | 6                | 0              | 0.233128                    | -1.801056 | 2.811538  |
| 7                | 6                | 0              | 0.328729                    | 3.212028  | -3.202404 |
| 8                | 6                | 0              | -1.588415                   | 1.53445   | -4.58662  |
| 9                | 6                | 0              | -1.746424                   | -0.836066 | -2.942799 |
| 10               | 6                | 0              | -3.009625                   | -3.08597  | -4.224638 |
| 11               | 8                | 0              | -4.03818                    | 2.612526  | -4.847571 |
| 12               | 6                | 0              | 5.282206                    | 4.751338  | -0.631063 |
| 13               | 8                | 0              | 5.869871                    | 0.411333  | 0.576319  |
| 14               | 6                | 0              | -2.236899                   | -3.122451 | 3.466833  |
| 15               | 6                | 0              | -1.953629                   | -5.798816 | 4.433685  |
| 16               | 6                | 0              | -4.53809                    | -2.084315 | 3.3496    |
| 17               | 8                | 0              | -0.582096                   | -5.885531 | 6.759811  |
| 18               | 1                | 0              | 1.878654                    | -2.46456  | -3.612172 |
| 19               | 1                | 0              | 3.778819                    | 1.19288   | -3.816383 |
| 20               | 1                | 0              | 1.554972                    | -2.357613 | 4.310401  |
| 21               | 1                | 0              | -1.399697                   | 1.731439  | 1.539679  |
| 22               | 1                | 0              | -0.743405                   | 1.607416  | 4.760471  |
| 23               | 1                | 0              | 3.792529                    | 2.191249  | 4.02667   |
| 24               | 1                | 0              | 1.951928                    | 4.600997  | 2.691518  |
| 25               | 1                | 0              | 3.383358                    | -3.142033 | 0.580244  |
| 26               | 1                | 0              | 0.553705                    | -4.73612  | -0.056837 |
| 27               | 1                | 0              | 1.095514                    | 4.719149  | -4.397542 |

|    |   |   |           |           |           |
|----|---|---|-----------|-----------|-----------|
| 28 | 1 | 0 | -0.642325 | 4.117439  | -1.613078 |
| 29 | 1 | 0 | -0.829095 | 1.014033  | -6.460257 |
| 30 | 1 | 0 | -2.892118 | -0.318387 | -1.301649 |
| 31 | 1 | 0 | -1.922815 | -3.707646 | -5.879097 |
| 32 | 1 | 0 | -3.170694 | -4.69     | -2.925636 |
| 33 | 1 | 0 | -4.913662 | -2.580619 | -4.856424 |
| 34 | 1 | 0 | -3.904133 | 4.037417  | -5.990421 |
| 35 | 1 | 0 | 6.490839  | 4.523575  | -2.301552 |
| 36 | 1 | 0 | 6.481054  | 5.321682  | 0.955419  |
| 37 | 1 | 0 | 3.939565  | 6.27626   | -1.020917 |
| 38 | 1 | 0 | 6.808252  | 0.123781  | -0.974201 |
| 39 | 1 | 0 | -3.822729 | -6.687854 | 4.63091   |
| 40 | 1 | 0 | -0.843846 | -6.956628 | 3.12604   |
| 41 | 1 | 0 | -6.211679 | -3.165374 | 3.854147  |
| 42 | 1 | 0 | -4.86497  | -0.152847 | 2.742365  |
| 43 | 1 | 0 | -1.474415 | -4.792141 | 7.931411  |

| 7_n           |               |             | Standard Orientation (A.U.) |           |           |
|---------------|---------------|-------------|-----------------------------|-----------|-----------|
| Center number | Atomic number | Atomic Type | X                           | Y         | Z         |
| 0             | 6             | 0           | 2.38974                     | 0.739344  | 3.62502   |
| 1             | 6             | 0           | 2.188702                    | 3.0775    | 1.917853  |
| 2             | 6             | 0           | 3.013157                    | 2.781131  | -0.866761 |
| 3             | 6             | 0           | 0.932451                    | 1.684311  | -2.597192 |
| 4             | 6             | 0           | -0.146956                   | -0.970397 | -1.981098 |
| 5             | 6             | 0           | -1.006404                   | -1.3987   | 0.76508   |
| 6             | 6             | 0           | 1.180017                    | -1.749459 | 2.675397  |
| 7             | 6             | 0           | -1.454088                   | 3.314217  | -2.934471 |
| 8             | 6             | 0           | -3.473209                   | 1.546665  | -4.100653 |
| 9             | 6             | 0           | -2.393397                   | -1.182266 | -3.852105 |
| 10            | 6             | 0           | -1.591699                   | -2.266167 | -6.415775 |
| 11            | 8             | 0           | -5.911636                   | 1.849634  | -2.995586 |
| 12            | 6             | 0           | 3.857844                    | 5.351686  | -1.890066 |
| 13            | 8             | 0           | 5.241293                    | 1.231191  | -1.039391 |
| 14            | 6             | 0           | 0.31826                     | -3.466597 | 4.818059  |
| 15            | 6             | 0           | 0.926884                    | -6.230871 | 4.401631  |
| 16            | 6             | 0           | -0.976321                   | -2.699508 | 6.840691  |
| 17            | 8             | 0           | -0.227568                   | -7.930119 | 6.111097  |
| 18            | 1             | 0           | 1.259021                    | -2.439049 | -2.410081 |
| 19            | 1             | 0           | 1.841289                    | 1.516758  | -4.455218 |
| 20            | 1             | 0           | 2.647826                    | -2.813866 | 1.648011  |
| 21            | 1             | 0           | 1.544001                    | 1.254984  | 5.438832  |
| 22            | 1             | 0           | 4.387096                    | 0.370931  | 4.02414   |
| 23            | 1             | 0           | 3.370909                    | 4.543435  | 2.78268   |
| 24            | 1             | 0           | 0.255705                    | 3.819325  | 1.969189  |
| 25            | 1             | 0           | -2.163922                   | -3.118407 | 0.784919  |
| 26            | 1             | 0           | -2.25576                    | 0.121936  | 1.425332  |
| 27            | 1             | 0           | -1.117552                   | 4.99287   | -4.091027 |
| 28            | 1             | 0           | -2.164145                   | 3.993946  | -1.109539 |
| 29            | 1             | 0           | -3.779025                   | 2.000617  | -6.094346 |
| 30            | 1             | 0           | -3.881798                   | -2.400608 | -3.079464 |
| 31            | 1             | 0           | -0.862456                   | -4.194272 | -6.2169   |
| 32            | 1             | 0           | -3.195795                   | -2.321392 | -7.72408  |
| 33            | 1             | 0           | -0.105424                   | -1.12074  | -7.295078 |
| 34            | 1             | 0           | -5.756873                   | 1.440833  | -1.21458  |
| 35            | 1             | 0           | 2.394453                    | 6.785273  | -1.607462 |
| 36            | 1             | 0           | 4.289412                    | 5.231367  | -3.909981 |
| 37            | 1             | 0           | 5.568188                    | 5.954155  | -0.896214 |
| 38            | 1             | 0           | 4.754791                    | -0.490082 | -0.649348 |
| 39            | 1             | 0           | 0.475744                    | -6.726257 | 2.423028  |
| 40            | 1             | 0           | 2.970578                    | -6.521462 | 4.611911  |
| 41            | 1             | 0           | -1.564036                   | -4.038749 | 8.278739  |
| 42            | 1             | 0           | -1.459186                   | -0.73094  | 7.157787  |
| 43            | 1             | 0           | -2.039897                   | -7.695736 | 5.957575  |

| 7_o           |               |             | Standard Orientation (A.U.) |           |           |
|---------------|---------------|-------------|-----------------------------|-----------|-----------|
| Center number | Atomic number | Atomic Type | X                           | Y         | Z         |
| 0             | 6             | 0           | 3.999454                    | -1.786776 | -0.127874 |
| 1             | 6             | 0           | 3.648602                    | -0.530686 | 2.463226  |
| 2             | 6             | 0           | 2.124995                    | 1.988035  | 2.551289  |
| 3             | 6             | 0           | 0.805216                    | 2.645123  | 0.013234  |
| 4             | 6             | 0           | -1.134344                   | 0.693732  | -1.073557 |

|    |   |   |           |           |           |
|----|---|---|-----------|-----------|-----------|
| 5  | 6 | 0 | -0.84778  | -2.066648 | -0.276004 |
| 6  | 6 | 0 | 1.68276   | -3.296584 | -1.071641 |
| 7  | 6 | 0 | -0.662459 | 5.194923  | 0.080646  |
| 8  | 6 | 0 | -3.290935 | 4.660461  | -1.057281 |
| 9  | 6 | 0 | -3.744196 | 1.847606  | -0.514091 |
| 10 | 6 | 0 | -5.956753 | 0.73931   | -1.987727 |
| 11 | 8 | 0 | -5.234638 | 6.30914   | -0.218364 |
| 12 | 6 | 0 | 0.36744   | 1.941104  | 4.861978  |
| 13 | 8 | 0 | 4.028072  | 3.90095   | 2.967218  |
| 14 | 6 | 0 | 1.676023  | -6.062515 | -0.284052 |
| 15 | 6 | 0 | 0.033267  | -7.791107 | -1.865853 |
| 16 | 6 | 0 | 3.004389  | -7.026629 | 1.636858  |
| 17 | 8 | 0 | 0.706329  | -7.736204 | -4.479881 |
| 18 | 1 | 0 | -0.910406 | 0.739988  | -3.142358 |
| 19 | 1 | 0 | 2.363445  | 2.837394  | -1.326015 |
| 20 | 1 | 0 | 1.721316  | -3.301985 | -3.14568  |
| 21 | 1 | 0 | 5.630343  | -3.058518 | -0.042228 |
| 22 | 1 | 0 | 4.50064   | -0.350962 | -1.528872 |
| 23 | 1 | 0 | 5.500125  | -0.07726  | 3.26498   |
| 24 | 1 | 0 | 2.776306  | -1.891155 | 3.755298  |
| 25 | 1 | 0 | -2.403117 | -3.137546 | -1.12403  |
| 26 | 1 | 0 | -1.080081 | -2.258455 | 1.772304  |
| 27 | 1 | 0 | 0.318432  | 6.708422  | -0.92939  |
| 28 | 1 | 0 | -0.948108 | 5.872375  | 2.020285  |
| 29 | 1 | 0 | -3.238424 | 4.932633  | -3.111415 |
| 30 | 1 | 0 | -4.125365 | 1.661818  | 1.527477  |
| 31 | 1 | 0 | -6.364569 | -1.211757 | -1.430245 |
| 32 | 1 | 0 | -7.660814 | 1.8705    | -1.672676 |
| 33 | 1 | 0 | -5.555698 | 0.748343  | -4.022609 |
| 34 | 1 | 0 | -5.393454 | 6.075647  | 1.594887  |
| 35 | 1 | 0 | -0.561938 | 3.762594  | 5.181576  |
| 36 | 1 | 0 | 1.492026  | 1.519232  | 6.545968  |
| 37 | 1 | 0 | -1.106219 | 0.500936  | 4.68787   |
| 38 | 1 | 0 | 3.173595  | 5.524034  | 2.994961  |
| 39 | 1 | 0 | 0.112074  | -9.726093 | -1.109608 |
| 40 | 1 | 0 | -1.94724  | -7.191634 | -1.82156  |
| 41 | 1 | 0 | 2.900414  | -9.02671  | 2.097987  |
| 42 | 1 | 0 | 4.227913  | -5.890575 | 2.827582  |
| 43 | 1 | 0 | 2.475558  | -8.210388 | -4.577693 |

| 7_p           |               |             | Standard Orientation (A.U.) |           |           |
|---------------|---------------|-------------|-----------------------------|-----------|-----------|
| Center number | Atomic number | Atomic Type | X                           | Y         | Z         |
| 0             | 6             | 0           | 0.207292                    | 0.997055  | 4.381056  |
| 1             | 6             | 0           | -0.337201                   | 3.269506  | 2.657743  |
| 2             | 6             | 0           | 1.426802                    | 3.661165  | 0.364037  |
| 3             | 6             | 0           | 0.695066                    | 2.071278  | -1.975361 |
| 4             | 6             | 0           | 0.613029                    | -0.84716  | -1.731023 |
| 5             | 6             | 0           | -0.829047                   | -1.910417 | 0.558635  |
| 6             | 6             | 0           | 0.604522                    | -1.593207 | 3.089736  |
| 7             | 6             | 0           | -1.862935                   | 2.74039   | -3.214649 |
| 8             | 6             | 0           | -2.686958                   | 0.388713  | -4.765241 |
| 9             | 6             | 0           | -0.630154                   | -1.644942 | -4.258974 |
| 10            | 6             | 0           | 1.282115                    | -1.806864 | -6.430035 |
| 11            | 8             | 0           | -5.180503                   | -0.444526 | -4.157239 |
| 12            | 6             | 0           | 1.441033                    | 6.464783  | -0.352638 |
| 13            | 8             | 0           | 4.006792                    | 3.133701  | 1.049558  |
| 14            | 6             | 0           | 0.024158                    | -3.815981 | 4.821417  |
| 15            | 6             | 0           | 1.939426                    | -5.9222   | 4.767378  |
| 16            | 6             | 0           | -2.035968                   | -3.999596 | 6.265506  |
| 17            | 8             | 0           | 2.38457                     | -6.635104 | 2.198679  |
| 18            | 1             | 0           | 2.534142                    | -1.629243 | -1.626595 |
| 19            | 1             | 0           | 2.184174                    | 2.490468  | -3.356346 |
| 20            | 1             | 0           | 2.617031                    | -1.774183 | 2.609496  |
| 21            | 1             | 0           | -1.370397                   | 0.86616   | 5.712697  |
| 22            | 1             | 0           | 1.881564                    | 1.408216  | 5.527349  |
| 23            | 1             | 0           | -0.228897                   | 4.962198  | 3.848584  |
| 24            | 1             | 0           | -2.294239                   | 3.185872  | 1.985301  |
| 25            | 1             | 0           | -1.114559                   | -3.929264 | 0.226491  |
| 26            | 1             | 0           | -2.718783                   | -1.066301 | 0.7428    |
| 27            | 1             | 0           | -1.731409                   | 4.440341  | -4.383006 |
| 28            | 1             | 0           | -3.328333                   | 3.117385  | -1.801259 |

|    |   |   |           |           |           |
|----|---|---|-----------|-----------|-----------|
| 29 | 1 | 0 | -2.793433 | 0.82308   | -6.783357 |
| 30 | 1 | 0 | -1.553884 | -3.49108  | -4.079631 |
| 31 | 1 | 0 | 2.225275  | 0.006937  | -6.765316 |
| 32 | 1 | 0 | 2.748735  | -3.210577 | -6.021898 |
| 33 | 1 | 0 | 0.344091  | -2.35606  | -8.192711 |
| 34 | 1 | 0 | -5.155122 | -1.014598 | -2.415072 |
| 35 | 1 | 0 | 2.296609  | 7.559619  | 1.179285  |
| 36 | 1 | 0 | -0.480092 | 7.163266  | -0.666848 |
| 37 | 1 | 0 | 2.550592  | 6.776424  | -2.071043 |
| 38 | 1 | 0 | 4.18035   | 1.316311  | 1.18778   |
| 39 | 1 | 0 | 3.710415  | -5.236979 | 5.631705  |
| 40 | 1 | 0 | 1.271984  | -7.535791 | 5.894152  |
| 41 | 1 | 0 | -2.414949 | -5.685292 | 7.375569  |
| 42 | 1 | 0 | -3.421818 | -2.492324 | 6.407086  |
| 43 | 1 | 0 | 3.84897   | -7.733438 | 2.169205  |

**7\_q**

Standard Orientation (A.U.)

| Center number | Atomic number | Atomic Type | X         | Y         | Z         |
|---------------|---------------|-------------|-----------|-----------|-----------|
| 0             | 6             | 0           | 1.230214  | 0.408472  | 3.80283   |
| 1             | 6             | 0           | 2.598082  | 2.113901  | 1.895084  |
| 2             | 6             | 0           | 3.794782  | 0.792101  | -0.417046 |
| 3             | 6             | 0           | 1.936949  | 0.414487  | -2.625262 |
| 4             | 6             | 0           | -0.516929 | -1.127532 | -2.157226 |
| 5             | 6             | 0           | -1.979592 | -0.642584 | 0.312667  |
| 6             | 6             | 0           | -0.591968 | -1.59593  | 2.688079  |
| 7             | 6             | 0           | 1.063666  | 2.890638  | -3.930568 |
| 8             | 6             | 0           | -1.660559 | 2.440326  | -4.852467 |
| 9             | 6             | 0           | -2.131675 | -0.419245 | -4.497448 |
| 10            | 6             | 0           | -1.386241 | -1.90954  | -6.869251 |
| 11            | 8             | 0           | -3.274264 | 3.963292  | -3.298404 |
| 12            | 6             | 0           | 6.082528  | 2.326962  | -1.33612  |
| 13            | 8             | 0           | 4.6415    | -1.719233 | 0.204106  |
| 14            | 6             | 0           | -2.363634 | -2.536005 | 4.746773  |
| 15            | 6             | 0           | -1.423538 | -4.712924 | 6.336681  |
| 16            | 6             | 0           | -4.616901 | -1.500172 | 5.234619  |
| 17            | 8             | 0           | 0.867192  | -4.145048 | 7.658588  |
| 18            | 1             | 0           | -0.05621  | -3.147955 | -2.195947 |
| 19            | 1             | 0           | 3.025304  | -0.672778 | -4.013703 |
| 20            | 1             | 0           | 0.582852  | -3.199371 | 2.11113   |
| 21            | 1             | 0           | 0.154255  | 1.64858   | 5.071156  |
| 22            | 1             | 0           | 2.602149  | -0.582861 | 4.990958  |
| 23            | 1             | 0           | 4.08439   | 3.134096  | 2.926109  |
| 24            | 1             | 0           | 1.304089  | 3.577269  | 1.211452  |
| 25            | 1             | 0           | -3.773817 | -1.666723 | 0.143729  |
| 26            | 1             | 0           | -2.480577 | 1.358222  | 0.478282  |
| 27            | 1             | 0           | 2.322583  | 3.397104  | -5.489847 |
| 28            | 1             | 0           | 1.029156  | 4.502779  | -2.637576 |
| 29            | 1             | 0           | -1.906165 | 2.996127  | -6.841668 |
| 30            | 1             | 0           | -4.147068 | -0.764481 | -4.129214 |
| 31            | 1             | 0           | -1.633253 | -3.942704 | -6.569769 |
| 32            | 1             | 0           | -2.54976  | -1.355748 | -8.4917   |
| 33            | 1             | 0           | 0.593106  | -1.5922   | -7.388497 |
| 34            | 1             | 0           | -5.00532  | 3.509305  | -3.695788 |
| 35            | 1             | 0           | 5.57102   | 4.285893  | -1.764917 |
| 36            | 1             | 0           | 6.900652  | 1.468134  | -3.031633 |
| 37            | 1             | 0           | 7.543515  | 2.371043  | 0.134807  |
| 38            | 1             | 0           | 5.744     | -1.586089 | 1.663348  |
| 39            | 1             | 0           | -2.908222 | -5.329203 | 7.656753  |
| 40            | 1             | 0           | -0.944275 | -6.326435 | 5.129372  |
| 41            | 1             | 0           | -5.811061 | -2.19682  | 6.755459  |
| 42            | 1             | 0           | -5.36439  | 0.063861  | 4.133509  |
| 43            | 1             | 0           | 0.524737  | -2.658446 | 8.676409  |

**7\_r**

Standard Orientation (A.U.)

| Center number | Atomic number | Atomic Type | X         | Y         | Z         |
|---------------|---------------|-------------|-----------|-----------|-----------|
| 0             | 6             | 0           | 3.508137  | -0.18559  | 2.815325  |
| 1             | 6             | 0           | 1.245874  | 1.513295  | 3.477621  |
| 2             | 6             | 0           | 0.674385  | 3.546001  | 1.460779  |
| 3             | 6             | 0           | -0.379168 | 2.537194  | -1.058917 |
| 4             | 6             | 0           | 0.801637  | 0.142359  | -2.278456 |
| 5             | 6             | 0           | 0.697111  | -2.235716 | -0.598333 |



|    |   |   |           |           |           |
|----|---|---|-----------|-----------|-----------|
| 6  | 6 | 0 | 2.907701  | -2.5889   | 1.269801  |
| 7  | 6 | 0 | -3.235285 | 1.972961  | -1.149273 |
| 8  | 6 | 0 | -3.644463 | 0.40548   | -3.596323 |
| 9  | 6 | 0 | -0.946146 | -0.220775 | -4.602177 |
| 10 | 6 | 0 | -0.207568 | 1.442105  | -6.855951 |
| 11 | 8 | 0 | -5.178874 | -1.777864 | -3.207224 |
| 12 | 6 | 0 | -1.118552 | 5.535027  | 2.575721  |
| 13 | 8 | 0 | 2.989575  | 4.79617   | 0.736814  |
| 14 | 6 | 0 | 2.456674  | -4.889534 | 2.935058  |
| 15 | 6 | 0 | 0.685067  | -4.677169 | 5.1688    |
| 16 | 6 | 0 | 3.585239  | -7.099998 | 2.457285  |
| 17 | 8 | 0 | -1.884246 | -4.165227 | 4.474295  |
| 18 | 1 | 0 | 2.759983  | 0.491682  | -2.859938 |
| 19 | 1 | 0 | -0.022163 | 4.09488   | -2.378018 |
| 20 | 1 | 0 | 4.589204  | -3.011938 | 0.130484  |
| 21 | 1 | 0 | 4.498811  | -0.741803 | 4.548473  |
| 22 | 1 | 0 | 4.844806  | 0.967691  | 1.740697  |
| 23 | 1 | 0 | 1.668585  | 2.519578  | 5.246161  |
| 24 | 1 | 0 | -0.462565 | 0.407338  | 3.853734  |
| 25 | 1 | 0 | 0.665046  | -3.916106 | -1.813597 |
| 26 | 1 | 0 | -1.068022 | -2.265938 | 0.477008  |
| 27 | 1 | 0 | -4.381893 | 3.691306  | -1.129242 |
| 28 | 1 | 0 | -3.839905 | 0.845053  | 0.481075  |
| 29 | 1 | 0 | -4.691177 | 1.499048  | -5.004401 |
| 30 | 1 | 0 | -0.932911 | -2.192056 | -5.239226 |
| 31 | 1 | 0 | -1.499192 | 1.129695  | -8.444767 |
| 32 | 1 | 0 | -0.271962 | 3.459051  | -6.390562 |
| 33 | 1 | 0 | 1.713473  | 1.010866  | -7.498031 |
| 34 | 1 | 0 | -4.321772 | -2.820775 | -1.967641 |
| 35 | 1 | 0 | -0.218566 | 6.474113  | 4.190968  |
| 36 | 1 | 0 | -2.881316 | 4.686967  | 3.247991  |
| 37 | 1 | 0 | -1.571434 | 6.979705  | 1.166033  |
| 38 | 1 | 0 | 3.736812  | 5.479006  | 2.267896  |
| 39 | 1 | 0 | 0.796697  | -6.40753  | 6.312785  |
| 40 | 1 | 0 | 1.219913  | -3.094085 | 6.386396  |
| 41 | 1 | 0 | 3.259851  | -8.757889 | 3.628303  |
| 42 | 1 | 0 | 4.89094   | -7.33106  | 0.887075  |
| 43 | 1 | 0 | -2.414492 | -5.540401 | 3.382676  |
